# Supplementary material for: Copper-mediated tandem reaction of β-ketoesters/ketones with tertiary amines for the synthesis of 2,3-dihydrofurans
Source: Royal Society of Chemistry journal article supplement (doi:10.1039/c5ob00191a), 2015-01-01

Supporting Information for:

**Copper-mediated tandem reaction of  $\beta$ -ketoesters/ketones with tertiary amines  
for the synthesis of 2,3-dihydrofurans**

Shengmei Guo, Lin Lu, Jiuhan Gong,

Zheng Zhu, Feng Xu, Zhenhong Wei and Hu Cai\*

College of Chemistry, Nanchang University, Nanchang, Jiangxi 330031, P. R. China

E-mail: Caihu@ncu.edu.cn

**CONTENTS**

- 1 General experimental details and materials**
- 2 Optimization of the reaction conditions**
- 3 General procedure Copper Promoted Tandem Reaction**
- 4 Experimental characterization data and X-Ray for products**
- 5 Copies of product  $^1\text{H}$  NMR and  $^{13}\text{C}$  NMR**

**General experiment detail and metrials**

**Experimental:** All non-aqueous reactions and manipulations were performed in air atmosphere using standard Schlenk techniques. All solvents before use were dried and degassed by standard methods and stored under nitrogen. All reactions were monitored by TLC with silica gel-coated plates. NMR spectra were recorded on Agilent 400 spectrometers. Chemical shifts are reported in parts per million (ppm) down field from TMS with the solvent resonance as the internal standard. Coupling constants (J) are reported in Hz and refer to apparent peak multiplications. High resolution mass spectra (HRMS) Bruker Compass DataAnalysis 4.0 mass instrument (ESI). Single-crystal X-ray diffraction analysis was used on a Bruker Apex-II area-detector diffractometer at *ca* 293 K.

## Optimization of the Reaction Conditions

A solution of CuX, ethyl 3-oxo-3-phenylpropanoate (96 mg, 0.5 mmol), TMEDA (70 mg, 1.2 equiv) in 2 mL of solvent was stirred 80-120 °C for 6 h under oxidative conditions. After warming to room temperature, the mixture was washed with water; then EA extract three times. Organic layer was dried over Na<sub>2</sub>SO<sub>4</sub> and concentrated under reduced pressure to leave a crude solid, which was purified by column chromatography on silica gel.

**Table 1** Screen of CuX <sup>[a]</sup>

| 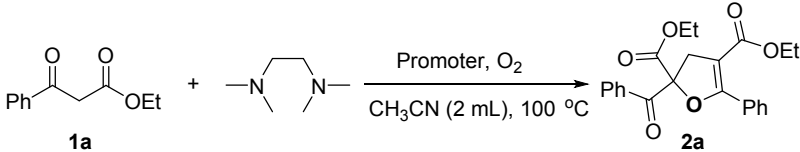 |                       |                        |
|------------------------------------------------------------------------------------|-----------------------|------------------------|
| entry                                                                              | CuX                   | yield (%) <sup>b</sup> |
| 1                                                                                  | no                    | 0                      |
| 2                                                                                  | CuCl                  | trace                  |
| 3                                                                                  | CuI                   | trace                  |
| 4                                                                                  | CuBr                  | trace                  |
| 5                                                                                  | CuF                   | trace                  |
| 6                                                                                  | Cu <sub>2</sub> O     | trace                  |
| 7                                                                                  | CuCl <sub>2</sub>     | 63                     |
| 8                                                                                  | CuBr <sub>2</sub>     | 24                     |
| 9                                                                                  | CuCN                  | trace                  |
| 10                                                                                 | CuOAc                 | trace                  |
| 11                                                                                 | Cu(OAc) <sub>2</sub>  | trace                  |
| 12 <sup>c</sup>                                                                    | Cu(acac) <sub>2</sub> | trace                  |
| 13                                                                                 | CuSO <sub>4</sub>     | trace                  |
| 14                                                                                 | I <sub>2</sub>        | 0                      |

<sup>a</sup> **1a** (0.5 mmol), TMEDA (0.6 mmol), copper (0.6 mmol), O<sub>2</sub> (1 atm), CH<sub>3</sub>CN (2 mL), 100 °C, 6 h;

<sup>b</sup> Isolated yield;

**Table 2** Screen of solvent<sup>[a]</sup>

CCOC(=O)CC(=O)c1ccccc1 + CN1CCN(C1)
 $\xrightarrow[\text{solvent (2 mL), 100 } ^\circ\text{C}]{\text{CuCl}_2, \text{O}_2 (1\text{ atm})}$ 
CCOC(=O)C1=C(c2ccccc2)C(=O)C(=O)C1C(=O)c3ccccc3

**1a**  **2a**

| entry           | Solvent(1mL)       | Yield (%) <sup>b</sup> |
|-----------------|--------------------|------------------------|
| 1               | DMSO               | 17                     |
| 2               | THF                | trace                  |
| 3               | Dioxane            | trace                  |
| 4               | CH <sub>3</sub> CN | 64                     |
| 6               | DMF                | trace                  |
| 7               | hexane             | trace                  |
| 8               | Xyl                | trace                  |
| 9               | DMA                | 22                     |
| 10              | TBME               | trace                  |
| 11              | DCM                | trace                  |
| 12 <sup>c</sup> | EtOH               | 28                     |
| 13              | Toluene            | trace                  |
| 14              | DME                | trace                  |
| 15              | Mesitylene         | trace                  |

<sup>a</sup> **1a** (0.5 mmol), TMEDA (0.6 mmol), CuCl<sub>2</sub> (0.6 mmol), O<sub>2</sub> (1 atm), solvent (2 mL), 100 °C 6 h;

<sup>b</sup> Isolated yield;

**Table 3** Screen of Oxidant <sup>[a]</sup>

CCOC(=O)CC(=O)c1ccccc1 + CN1CCN(C1)
 $\xrightarrow[\text{CH}_3\text{CN (2 mL), 100 } ^\circ\text{C}]{\text{CuCl}_2, \text{Oxidant (2 eq)}}$ 
CCOC(=O)C1=C(c2ccccc2)C(=O)C(=O)C1C(=O)c3ccccc3

**1a**  **2a**

| entry | Oxidant        | Yield (%) <sup>b</sup> |
|-------|----------------|------------------------|
| 1     | TBHP(70% , aq) | trace                  |
| 2     | DTBP           | 81                     |
| 3     | Oxone          | trace                  |

|   |                                              |       |
|---|----------------------------------------------|-------|
| 4 | m-CPBA                                       | trace |
| 5 | K <sub>2</sub> S <sub>2</sub> O <sub>8</sub> | trace |
| 6 | DDQ                                          | 38    |
| 7 | O <sub>2</sub>                               | 64    |
| 8 | Benzoyl Peroxide                             | trace |

<sup>a</sup>**1a** (0.5 mmol), TMEDA (0.6 mmol), CuCl<sub>2</sub> (0.6 mmol), Oxidant (4 equiv), solvent (2 mL), 100 °C, 6 h; <sup>b</sup> isolated yield.

**Table 4** Screen of other conditions <sup>[a]</sup>

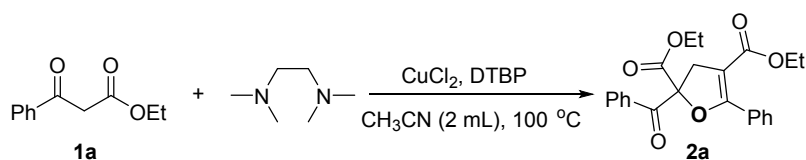

| entry           | promoter                      | Yield (%) <sup>b</sup> |
|-----------------|-------------------------------|------------------------|
| 1               | CuCl <sub>2</sub> (2 equiv)   | trace                  |
| 2               | CuCl <sub>2</sub> (0.2 equiv) | trace                  |
| 3               | CuCl <sub>2</sub> (1.5 equiv) | 70                     |
| 4               | CuCl <sub>2</sub> (1 equiv)   | 64                     |
| 5               | CuCl <sub>2</sub> (1.2 equiv) | 81                     |
| 6 <sup>c</sup>  | CuCl <sub>2</sub> (1.2 equiv) | 79                     |
| 7 <sup>d</sup>  | CuCl <sub>2</sub> (1.2 equiv) | 68                     |
| 8 <sup>e</sup>  | CuCl <sub>2</sub> (1.2 equiv) | 82                     |
| 9 <sup>f</sup>  | CuCl <sub>2</sub> (1.2 equiv) | 70                     |
| 10 <sup>g</sup> | CuCl <sub>2</sub> (1.2 equiv) | 66                     |
| 11 <sup>h</sup> | CuCl <sub>2</sub> (1.2 equiv) | 74                     |
| 12 <sup>i</sup> | CuCl <sub>2</sub> (1.2 equiv) | 80                     |

<sup>a</sup>**1a** (0.5 mmol), TMEDA (0.6 mmol), CuCl<sub>2</sub> (0.6 mmol), DTBP (4 eq), CH<sub>3</sub>CN (2 mL), 100 °C, 6 h; <sup>b</sup> isolated yield; <sup>c</sup>120 °C; <sup>d</sup> 80 °C ;<sup>e</sup> DTBP (2 eq); <sup>f</sup> DTBP (1.2 equiv); <sup>g</sup> DTBP (2 eq), 2 h; <sup>h</sup> DTBP (2 equiv), 4 h; <sup>i</sup> DTBP (1 equiv), 12 h.

**Table 4** Screen of other condition <sup>[a]</sup>

| entry | Amine                              | Yield (%) <sup>b</sup> |
|-------|------------------------------------|------------------------|
| 1     | Et <sub>3</sub> N                  | trace                  |
| 2     | PhNHCH <sub>3</sub>                | 46                     |
| 3     | BnNHCH <sub>3</sub>                | trace                  |
| 4     | PhN(CH <sub>3</sub> ) <sub>2</sub> | trace                  |

<sup>a</sup>1a (0.5 mmol), Amine (0.6 mmol), CuCl<sub>2</sub> (0.6 mmol), DTBP (4 eq), CH<sub>3</sub>CN (2 mL), 100 °C, 6 h; <sup>b</sup> isolated yield;

### General procedure Cu- promoter Tandem Reaction

CuCl<sub>2</sub> (80.7 mg, 0.6 mmol), β-ketoester derivatives (0.5 mmol, 1 eq) were added to a 50 mL Schleck tube under air. Then CH<sub>3</sub>CN (2 mL), TMEDA (1.2 equiv) and DTBP (2 equiv) were added. The Schleck tube was sealed with a rubber septum and stirred for 6 h at 100 °C. The mixture was allowed to cool to room temperature, and washed with water, EA extract three times. The organic layer dried over anhydrous Na<sub>2</sub>SO<sub>4</sub>. The solvent was removed under reduced pressure, and the residue was purified by column chromatography on silica gel and eluted with EtOAc/hexanes (1/20–1/10) to afford the desired product.

**1. Diethyl 2-benzoyl-5-phenyl-2,3-dihydrofuran-2,4-dicarboxylate (2a).** The title compound was prepared according to the general procedure and purified by column

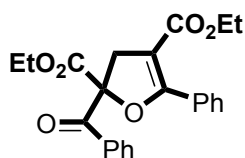

chromatography to give a white solid, 82% yield. <sup>1</sup>H NMR (400 MHz, CDCl<sub>3</sub>) δ 8.10 (d, *J* = 7.6 Hz, 2H), 7.81 (d, *J* = 7.2 Hz, 2H), 7.58 (t, *J* = 7.2 Hz, 1H), 7.46 (t, *J* = 7.6 Hz, 2H), 7.37 (dt, *J* = 14.4, 7.2 Hz, 3H), 4.19 (dq, *J* = 32, 6.8 Hz, 5H), 3.45 (d, *J* = 16.4 Hz, 1H), 1.23 (t, *J* = 7.2 Hz, 3H), 1.14 (t, *J* = 7.2 Hz, 3H); <sup>13</sup>C NMR (101 MHz, CDCl<sub>3</sub>) δ 190.10, 169.27, 164.22, 162.65, 133.96, 133.64, 130.83, 129.95, 129.70, 128.88, 128.78, 127.78, 102.46, 90.15, 62.79, 60.33, 38.40, 14.32, 13.95. HRMS (ESI) calcd. for C<sub>23</sub>H<sub>22</sub> Na O<sub>6</sub> [M+23]: 417.1309, found: 417.1330

**2. Dimethyl 2-benzoyl-5-phenyl-2,3-dihydrofuran-2,4-dicarboxylate (2b).** The title

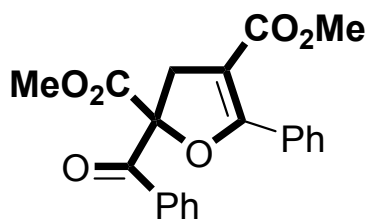

compound was prepared according to the general procedure and purified by column chromatography to give a white solid, 67% yield. <sup>1</sup>H NMR (400 MHz, CDCl<sub>3</sub>) δ 8.10 (d, *J* = 8.2 Hz, 2H), 7.82 (d, *J* = 8.0 Hz, 2H), 7.59 (t, *J* = 14.8 Hz, 1H), 7.47 (t, *J* =

14.8 Hz, 2H), 7.38 (dt, *J* = 14.8, 7.4 Hz, 3H), 4.20 (d, *J* = 16 Hz, 1H), 3.77 (s, 3H), 3.70 (s, 3H), 3.50 (d, *J* = 16 Hz, 1H); <sup>13</sup>C NMR (101 MHz, CDCl<sub>3</sub>) δ 190.03, 169.67, 164.53, 162.85, 134.03, 133.46, 130.93, 129.92, 129.61, 128.83, 128.67, 127.84, 102.08, 90.24, 53.61, 51.45, 38.48. HRMS (ESI) calcd. for C<sub>21</sub>H<sub>18</sub> Na O<sub>6</sub> [M+23]: 389.0996, found: 389.0995.

**3. Diethyl 2-(4-nitrobenzoyl)-5-(4-nitrophenyl)-2,3-dihydrofuran-2,4-dicarboxylate (2c).** The title compound was prepared according to the general procedure and

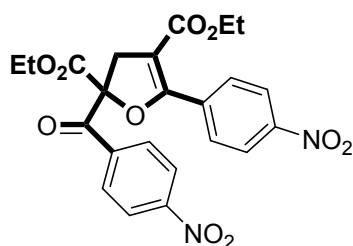

purified by column chromatography to give a white solid, 83% yield. <sup>1</sup>H NMR (400 MHz, CDCl<sub>3</sub>) δ 8.34 (d, *J* = 8.8 Hz, 2H), 8.30 – 8.20 (m, 4H), 8.00 (d, *J* = 8.8 Hz, 2H), 4.29 (td, *J* = 7.2, 4.0 Hz, 2H), 4.25 (dd, *J* = 9.2, 3.2 Hz, 1H), 4.22 – 4.15 (m, 2H), 3.49 (d, *J* =

17.2 Hz, 1H), 1.27 (t, *J* = 7.2 Hz, 3H), 1.19 (t, *J* = 7.2 Hz, 3H); <sup>13</sup>C NMR (101 MHz, CDCl<sub>3</sub>) δ 188.46, 168.39, 163.37, 159.49, 150.88, 149.00, 137.99, 134.48, 131.01, 130.73, 124.05, 123.13, 105.70, 90.29, 63.51, 61.02, 38.52, 14.31, 14.03. HRMS (ESI) calcd. for C<sub>21</sub>H<sub>16</sub> N<sub>2</sub>Na O<sub>10</sub> [M+23]: 479.0702, found: 479.0708.

**4. Diethyl 2-(2,3,4,5-tetrafluorobenzoyl)-5-(2,3,4,5-tetrafluorophenyl)-2,3-dihydrofuran-2,4-dicarboxylate (2d).** The title compound was prepared according to the

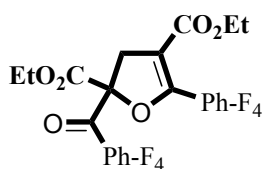

general procedure and purified by column chromatography to give a white solid, 93% yield. <sup>1</sup>H NMR (400 MHz, CDCl<sub>3</sub>) δ 7.60 (d, *J* = 7.2 Hz, 1H), 7.19 (d, *J* = 7.6 Hz, 1H), 4.35 (dd, *J* = 11.2, 6.8 Hz, 2H), 4.14 (q, *J* = 7.2 Hz, 2H),

3.95 (d, *J* = 16.8 Hz, 1H), 3.55 (d, *J* = 16.8 Hz, 1H), 1.30 (t, *J* = 7.2 Hz, 3H), 1.20 (t, *J* = 7.2 Hz, 3H); <sup>13</sup>C NMR (101 MHz, CDCl<sub>3</sub>) δ 187.39, 186.85, 166.86, 162.75, 154.17, 148.59, 148.00, 146.07, 145.45, 142.95, 142.40, 140.83, 139.71, 112.60, 107.49, 91.62, 62.88, 60.90, 38.12, 14.06. HRMS (ESI) calcd. for C<sub>23</sub>H<sub>14</sub>F<sub>8</sub> Na O<sub>6</sub> [M+23]: 561.0555, found: 561.0552.

**5. Dimethyl 2-(4-bromobenzoyl)-5-(4-bromophenyl)-2,3-dihydrofuran-2,4-dicarboxylate (2e).** The title compound was prepared according to the

**oxylate (2e).** The title compound was prepared according to the general procedure and purified by column chromatography to give a white solid, 87% yield. <sup>1</sup>H NMR

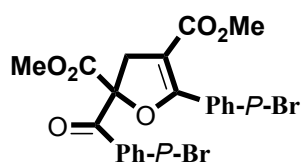

(400 MHz, CDCl<sub>3</sub>) δ 7.95 (d, *J* = 8.4 Hz, 2H), 7.71 (d, *J* = 8.4 Hz, 2H), 7.63 (d, *J* = 8.4 Hz, 2H), 7.52 (d, *J* = 8.4 Hz, 2H), 4.18 (d, *J* = 16.8 Hz, 1H), 3.78 (s, 3H), 3.71 (s, 3H), 3.44 (d, *J* = 16.4 Hz, 1H); <sup>13</sup>C NMR (101 MHz, CDCl<sub>3</sub>) δ 188.99, 169.44, 164.33, 161.55, 132.32, 132.15, 131.44, 131.27, 131.17, 129.75, 127.43, 125.64, 102.81, 90.20, 53.78, 51.67, 38.46. HRMS (ESI) calcd. for C<sub>21</sub>H<sub>16</sub>Br<sub>2</sub>Na O<sub>6</sub> [M+23]: 544.9206, found: 544.9209.

**6. Dimethyl 2-(4-chlorobenzoyl)-5-(4-chlorophenyl)-2,3-dihydrofuran-2,4-dicarboxylate (2f).** The title compound was prepared according to the general procedure and purified by column chromatography to give a white solid, 99% yield. <sup>1</sup>H NMR

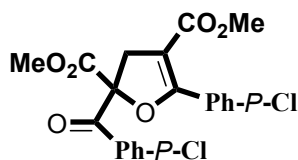

(400 MHz, CDCl<sub>3</sub>) δ 8.04 (d, *J* = 8.4 Hz, 2H), 7.79 (d, *J* = 8.4 Hz, 2H), 7.46 (d, *J* = 8.4 Hz, 2H), 7.36 (d, *J* = 8.4 Hz, 2H), 4.19 (d, *J* = 16.4 Hz, 1H), 3.78 (s, 3H), 3.71 (s, 3H), 3.45 (d, *J* = 16.4 Hz, 1H); <sup>13</sup>C NMR (101 MHz, CDCl<sub>3</sub>) δ 188.76, 169.45, 164.33, 161.47, 140.85, 137.13, 131.73, 131.38, 130.99, 129.30, 128.27, 126.97, 102.70, 90.19, 53.74, 51.58, 38.43. HRMS (ESI) calcd. for C<sub>21</sub>H<sub>16</sub>Cl<sub>2</sub>Na O<sub>6</sub> [M+23]: 457.0216, found: 457.0195.

**7. Dimethyl 2-(4-fluorobenzoyl)-5-(4-fluorophenyl)-2,3-dihydrofuran-2,4-dicarboxylate (2g).** The title compound was prepared according to the general procedure

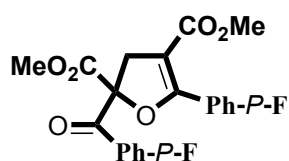

and purified by column chromatography to give a white solid, 80% yield. <sup>1</sup>H NMR (400 MHz, CDCl<sub>3</sub>) δ 8.19 – 8.10 (m, 2H), 7.92 – 7.82 (m, 2H), 7.16 (t, *J* = 8.0 Hz, 2H), 7.07 (t, *J* = 8.4 Hz, 2H), 4.20 (d, *J* = 16.4 Hz, 1H), 3.78 (s, 3H), 3.71 (s, 3H), 3.46 (d, *J* = 16.4 Hz, 1H); <sup>13</sup>C NMR (101 MHz, CDCl<sub>3</sub>) δ 188.40, 169.60, 167.58, 165.47, 165.02, 164.47, 162.97, 161.69, 132.88, 131.99, 129.85, 124.69, 116.07, 114.99, 102.08, 90.20, 53.69, 51.52, 38.41. HRMS (ESI) calcd. for C<sub>21</sub>H<sub>16</sub>F<sub>2</sub>Na O<sub>6</sub> [M+23]: 425.0807, found: 425.0797.

**8. Dimethyl 2-(4-methoxybenzoyl)-5-(4-methoxyphenyl)-2,3-dihydrofuran-2,4-dicarboxylate (2h).** The title compound was prepared according to the general procedure and purified by column chromatography to give a white solid, 68% yield. <sup>1</sup>H NMR (400 MHz, CDCl<sub>3</sub>) δ 8.11 (d, *J* = 8.4 Hz, 2H), 7.87 (d, *J* = 8.4 Hz, 2H), 6.95

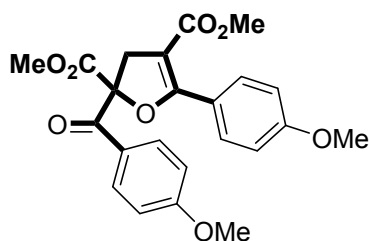

(d,  $J = 8.8$  Hz, 2H), 6.89 (d,  $J = 8.8$  Hz, 2H), 4.18 (d,  $J = 16.0$  Hz, 1H), 3.87 (s, 3H), 3.82 (s, 3H), 3.76 (s, 3H), 3.70 (s, 3H), 3.44 (d,  $J = 16.2$  Hz, 1H);  $^{13}\text{C}$  NMR (101 MHz,  $\text{CDCl}_3$ )  $\delta$  188.42, 169.95, 164.75, 164.08, 162.69, 161.53, 132.35, 131.34, 126.28, 120.97, 113.97, 113.13, 100.35, 90.00, 55.53, 55.32, 53.35, 51.25, 38.30. HRMS (ESI) calcd. for  $\text{C}_{23}\text{H}_{22}\text{NaO}_8$   $[\text{M}+23]$ : 449.1207, found: 449.1212.

**9. Dimethyl 2-(4-methylbenzoyl)-5-(p-tolyl)-2,3-dihydrofuran-2,4-dicarboxylate**

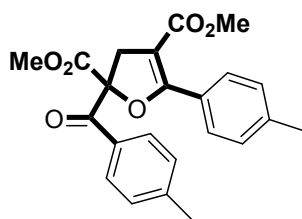

(2i). The title compound was prepared according to the general procedure and purified by column chromatography to give a white solid, 78% yield.  $^1\text{H}$  NMR (400 MHz,  $\text{CDCl}_3$ )  $\delta$  8.00 (d,  $J = 8.0$  Hz, 2H), 7.74 (d,  $J = 8.0$  Hz, 2H), 7.26 (d,  $J = 8.0$  Hz, 2H), 7.18 (d,  $J = 8.0$  Hz, 2H), 4.17 (d,  $J = 16.4$  Hz, 1H), 3.76 (s, 3H), 3.69 (s, 3H), 3.46 (d,  $J = 16.4$  Hz, 1H), 2.41 (s, 3H), 2.36 (s, 3H);  $^{13}\text{C}$  NMR (101 MHz,  $\text{CDCl}_3$ )  $\delta$  189.63, 169.90, 164.72, 163.15, 145.11, 141.33, 130.94, 130.12, 129.57, 128.56, 125.87, 101.37, 90.18, 53.51, 51.36, 38.42, 29.81, 21.85, 14.24. HRMS (ESI) calcd. for  $\text{C}_{23}\text{H}_{22}\text{NaO}_6$   $[\text{M}+23]$ : 417.1309, found: 417.1312.

**10. Dimethyl 5-(benzo[d][1,3]dioxol-5-yl)-2-(benzo[d][1,3]dioxole-5-carbonyl)-2,3-dihydrofuran-2,4-dicarboxylate (2j).**

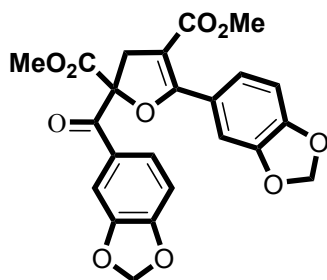

the general procedure and purified by column chromatography to give a white solid, 70% yield.  $^1\text{H}$  NMR (400 MHz,  $\text{CDCl}_3$ )  $\delta$  7.75 (d,  $J = 8.0$  Hz, 1H), 7.56 (s, 1H), 7.48 (d,  $J = 8.0$  Hz, 1H), 7.39 (s, 1H), 6.87 (d,  $J = 8.4$  Hz, 1H), 6.82 (d,  $J = 8.4$  Hz, 1H), 6.06 (s, 2H), 5.99 (s, 2H), 4.17 (d,  $J = 16.4$  Hz, 1H), 3.77 (s, 3H), 3.71 (s, 3H), 3.42 (d,  $J = 16.4$  Hz, 1H);  $^{13}\text{C}$  NMR (101 MHz,  $\text{CDCl}_3$ )  $\delta$  199.03, 187.99, 169.93, 164.70, 162.29, 152.68, 149.83, 148.36, 147.17, 128.01, 126.84, 124.94, 122.32, 109.96, 109.54, 108.32, 107.87, 102.15, 101.56, 100.99, 90.00, 53.62, 51.43, 38.58. HRMS (ESI) calcd. for  $\text{C}_{23}\text{H}_{18}\text{NaO}_{10}$   $[\text{M}+23]$ : 477.0792, found: 477.0794.

**11. Dimethyl 2-(2-naphthoyl)-5-(naphthalen-2-yl)-2,3-dihydrofuran-2,4-dicarboxylate (2k).** The title compound was prepared according to the general procedure and purified by column chromatography to give a white solid, 95% yield.  $^1\text{H}$  NMR (400



MHz, CDCl<sub>3</sub>)  $\delta$  8.74 (s, 1H), 8.40 (s, 1H), 8.14 (d,  $J$  = 8.8 Hz, 1H), 7.99 (d,  $J$  = 8.0 Hz,

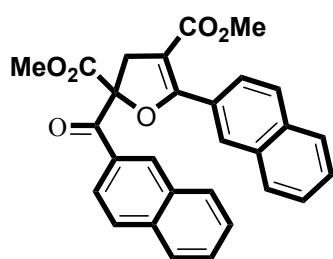

1H), 7.95 – 7.76 (m, 6H), 7.65 – 7.42 (m, 4H), 4.31 (d,  $J$  = 16.4 Hz, 1H), 3.79 (s, 3H), 3.72 (s, 3H), 3.63 (d,  $J$  = 16.4 Hz, 1H); <sup>13</sup>C NMR (101 MHz, CDCl<sub>3</sub>)  $\delta$  190.19, 169.82, 164.63, 162.91, 135.96, 134.44, 132.53, 132.47, 132.40, 130.81, 130.38, 130.18, 129.27, 129.04, 128.71,

127.86, 127.70, 127.59, 127.38, 127.07, 126.42, 126.08, 125.00, 102.45, 90.59, 53.65, 51.54, 38.80. HRMS (ESI) calcd. for C<sub>29</sub>H<sub>23</sub>O<sub>6</sub> [M+1]: 467.1489, found: 467.1502.

**12. Dimethyl-2-(3,4-dichlorobenzoyl)-5-(3,4-dichlorophenyl)-2,3-dihydrofuran-2,4-dicarboxylate (2l).** The title compound was prepared according to the general

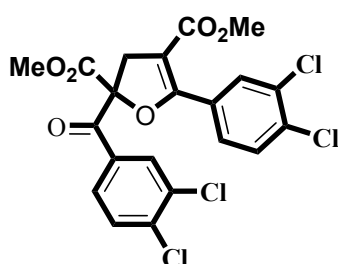

procedure and purified by column chromatography to give a white solid, 87% yield. <sup>1</sup>H NMR (400 MHz, CDCl<sub>3</sub>)  $\delta$  8.18 (s, 1H), 7.97 (s, 1H), 7.92 (d,  $J$  = 8.4 Hz, 1H), 7.73 (d,  $J$  = 7.2 Hz, 1H), 7.59 (d,  $J$  = 8.4 Hz, 1H), 7.48 (d,  $J$  = 8.4 Hz, 1H), 4.19 (d,  $J$  = 24.0 Hz, 1H), 3.81

(s, 3H), 3.73 (s, 3H), 3.49 (d,  $J$  = 16.8 Hz, 1H); <sup>13</sup>C NMR (101 MHz, CDCl<sub>3</sub>)  $\delta$  188.02, 169.01, 164.07, 159.80, 139.21, 135.44, 133.94, 132.94, 132.52, 131.98, 131.51, 131.13, 130.69, 130.17, 128.83, 128.29, 103.80, 90.27, 53.95, 51.93, 38.49. HRMS (ESI) calcd. for C<sub>21</sub>H<sub>14</sub>Cl<sub>4</sub>NaO<sub>6</sub> [M+23]: 524.9437, found: 524.9458.

**13. Dimethyl-2-(3,4-dimethylbenzoyl)-5-(3,4-dimethylphenyl)-2,3-dihydrofuran-2,4-dicarboxylate (2m).** The title compound was prepared according to the general

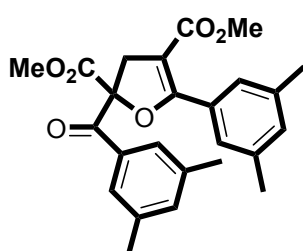

procedure and purified by column chromatography to give a white solid, 86% yield. <sup>1</sup>H NMR (400 MHz, CDCl<sub>3</sub>)  $\delta$  7.68 (d,  $J$  = 8.0 Hz, 1H), 7.19 (d,  $J$  = 7.6 Hz, 1H), 7.08 (s, 1H), 6.98 (d,  $J$  = 9.2 Hz, 3H), 4.07 (d,  $J$  = 16.0 Hz, 1H), 3.75 (s, 3H), 3.60 (s, 3H), 3.47 (d,  $J$  = 16.0 Hz, 1H), 2.50

(s, 3H), 2.31 (d,  $J$  = 6.0 Hz, 6H), 2.19 (s, 3H); <sup>13</sup>C NMR (101 MHz, CDCl<sub>3</sub>)  $\delta$  192.81, 169.91, 164.68, 164.42, 143.04, 140.86, 140.19, 137.39, 133.16, 130.95, 130.84, 130.03, 126.35, 126.25, 126.03, 103.88, 91.45, 53.34, 51.25, 37.93, 21.88, 21.50, 19.54. HRMS (ESI) calcd. for C<sub>25</sub>H<sub>26</sub>NaO<sub>6</sub> [M+23]: 445.1622, found: 445.1619.

**14. (5-phenyl-2,3-dihydrofuran-2,2,4-triyl)tris(phenylmethanone) (2n).** The title compound was prepared according to the general procedure and purified by column chromatography to give a white solid, 73% yield. <sup>1</sup>H NMR (400 MHz, CDCl<sub>3</sub>)  $\delta$  8.06 (d,  $J$  = 7.6 Hz, 4H), 7.54 (t,  $J$  = 7.6 Hz, 2H), 7.50 – 7.37 (m, 6H), 7.28 (s, 2H), 7.23 (s,

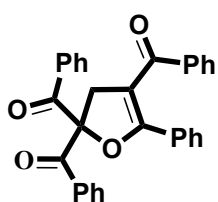

1H), 7.19 (t,  $J = 7.6$  Hz, 1H), 7.08 (dt,  $J = 15.2, 7.7$  Hz, 4H), 4.22 (s, 2H);  $^{13}\text{C}$  NMR (101 MHz,  $\text{CDCl}_3$ )  $\delta$  193.03, 192.76, 162.79, 138.47, 134.28, 133.63, 131.90, 130.61, 130.26, 129.78, 129.29, 129.24, 129.15, 129.04, 128.05, 127.99, 111.48, 96.31,

40.06. HRMS (ESI) calcd. for  $\text{C}_{31}\text{H}_{22}\text{NaO}_4$   $[\text{M}+23]$ : 481.1410 found: 481.1413.

**15. Diethyl 2-acetyl-5-methyl-2,3-dihydrofuran-2,4-dicarboxylate (2o).** The title compound was prepared according to the general procedure and purified by column chromatography to give a white solid, 54% yield.  $^1\text{H}$  NMR

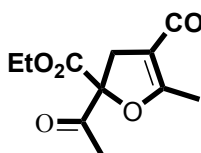

(400 MHz,  $\text{CDCl}_3$ )  $\delta$  4.28 (qd,  $J = 7.2, 2.4$  Hz, 2H), 4.17 (q,  $J = 7.2$  Hz, 2H), 3.35 (dd,  $J = 40.0, 16.0$  Hz, 2H), 2.29 (d,  $J = 5.6$  Hz, 6H), 1.29 (dd,  $J = 17.2, 7.2$  Hz, 6H);  $^{13}\text{C}$  NMR (101

MHz,  $\text{CDCl}_3$ )  $\delta$  201.07, 167.80, 165.50, 164.88, 102.43, 92.01, 62.84, 60.07, 35.88, 25.37, 14.47, 14.10, 13.94. HRMS (ESI) calcd. for  $\text{C}_{13}\text{H}_{18}\text{NaO}_6$   $[\text{M}+23]$ : 293.0996, found: 293.1002.

**16. Diethyl 2,5-diisopropyl-2,3-dihydrofuran-2,4-dicarboxylate (2p).** The title compound was prepared according to the general procedure and purified by column

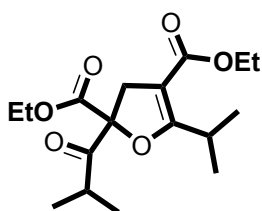

chromatography to give a white solid, 90% yield.  $^1\text{H}$  NMR (400 MHz,  $\text{CDCl}_3$ )  $\delta$  4.26 (dd,  $J = 12.4, 5.6$  Hz, 2H), 4.16 (q,  $J = 7.2$  Hz, 2H), 3.66 (dt,  $J = 13.6, 6.8$  Hz, 1H), 3.37 (d,  $J = 15.6$  Hz, 1H), 3.28 (d,  $J = 15.6$  Hz, 1H), 3.09 (dt,  $J = 13.6,$

6.8 Hz, 1H), 1.28 (dd,  $J = 12.8, 6.4$  Hz, 6H), 1.23 – 1.13 (m, 8H), 1.10 (d,  $J = 6.8$  Hz, 3H), 0.87 (dd,  $J = 15.2, 7.6$  Hz, 1H);  $^{13}\text{C}$  NMR (101 MHz,  $\text{CDCl}_3$ )  $\delta$  207.95, 173.36, 168.30, 164.95, 100.19, 91.79, 62.67, 60.06, 36.79, 36.73, 26.86, 19.73, 19.42, 19.05, 18.96, 14.55, 14.23. HRMS (ESI) calcd. for  $\text{C}_{17}\text{H}_{26}\text{NaO}_6$   $[\text{M}+23]$ : 349.1622, found: 349.1624.

**17. Di-tert-butyl 2-acetyl-5-methyl-2,3-dihydrofuran-2,4-dicarboxylate (2q).** The title compound was prepared according to the general procedure and purified by

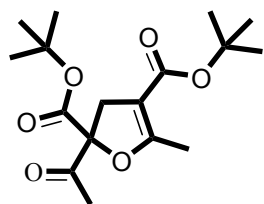

column chromatography to give a white solid, 65% yield.

$^1\text{H}$  NMR (400 MHz,  $\text{CDCl}_3$ )  $\delta$  3.36 (d,  $J = 16.1$  Hz, 1H), 3.13 (d,  $J = 15.4$  Hz, 1H), 2.27 (s, 3H), 2.23 (s, 3H), 1.48 (d,  $J = 2.8$  Hz, 18H);  $^{13}\text{C}$  NMR (101 MHz,  $\text{CDCl}_3$ )  $\delta$  201.22, 166.91, 164.48, 164.32, 103.67, 91.94, 84.05,

80.39, 35.76, 28.45, 27.89, 25.38, 13.92. HRMS (ESI) calcd. for  $\text{C}_{17}\text{H}_{26}\text{NaO}_6$   $[\text{M}+23]$ : 349.1622, found: 349.1615.

**18. Diisopropyl 2-acetyl-5-methyl-2,3-dihydrofuran-2,4-dicarboxylate (2r).** The

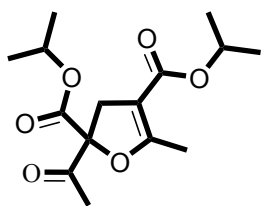

title compound was prepared according to the general procedure and purified by column chromatography to give a white solid, 71% yield.  $^1\text{H}$  NMR (400 MHz,  $\text{CDCl}_3$ )  $\delta$  5.08 (ddt,  $J = 27.2, 12.4, 6.2$  Hz, 2H), 3.39 (d,  $J = 15.6$  Hz, 1H), 3.23 (d,  $J = 15.6$  Hz, 1H), 2.28 (d,  $J = 5.2$  Hz, 6H), 1.27 (dd,  $J = 10.4, 6.2$  Hz, 12H);  $^{13}\text{C}$  NMR (101 MHz,  $\text{CDCl}_3$ )  $\delta$  200.94, 167.36, 165.17, 164.50, 102.70, 91.93, 70.86, 67.42, 35.72, 25.34, 22.14, 21.58, 13.93. HRMS (ESI) calcd. for  $\text{C}_{15}\text{H}_{22}\text{NaO}_6$   $[\text{M}+23]$ : 321.1309, found: 321.1311.

**19. 1,1',1''-(5-methyl-2,3-dihydrofuran-2,2,4-triyl)tris(ethan-1-one) (2s).** The title compound was prepared according to the general procedure and purified by column

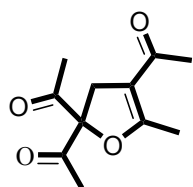

chromatography to give a white solid, 27% yield.  $^1\text{H}$  NMR (400 MHz,  $\text{CDCl}_3$ )  $\delta$  3.33 (s, 2H), 2.27 (t,  $J = 25.2$  Hz, 12H);  $^{13}\text{C}$  NMR (101 MHz,  $\text{CDCl}_3$ )  $\delta$  201.66, 193.71, 164.88, 111.50, 109.99, 97.81, 36.07, 29.58, 25.47, 14.6. HRMS (ESI) calcd. for  $\text{C}_{11}\text{H}_{14}\text{NaO}_4$   $[\text{M}+23]$ : 233.0784, found: 233.0797.

**The X-ray of 2a**

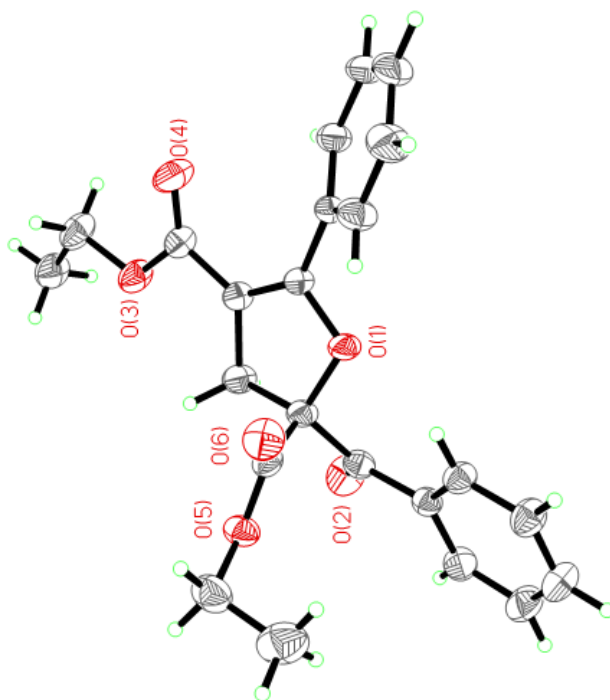

To study the reaction probably mechanism, we first employed methylene-bridged bis-1,3-dicarbonyl compounds as starting material, pyridine (2 equiv) instead of TMEDA was used under optical conditions, which afforded the target product in 74% yield (**eq 1**).  $\text{CuCl}_2$  was used as promoter in the reaction without DTBP, we found there was trace of product existed (**eq 2**). When methylene-bridged bis-1,3-dicarbonyl compounds was used as starting material, NBS (2 eq) was used as halogen reagent in oxidant condition and pyridine as base, we found the reaction could also perform, which means the reaction might undergo a halogenation procedure (**eq 3**). In order to confirm the reaction undergo a carbocation process, the oxidant such  $\text{K}_2\text{S}_2\text{O}_8$  and DTBP were used to oxidize the methylene-bridged bis-1,3-dicarbonyl compounds (**eq 4 and 5**). When  $\text{CuCl}_2$  (20 mol %) instead stoichiometry copper, and NBS as additive were used, the reaction could carry on with middle yields (**eq 6**).

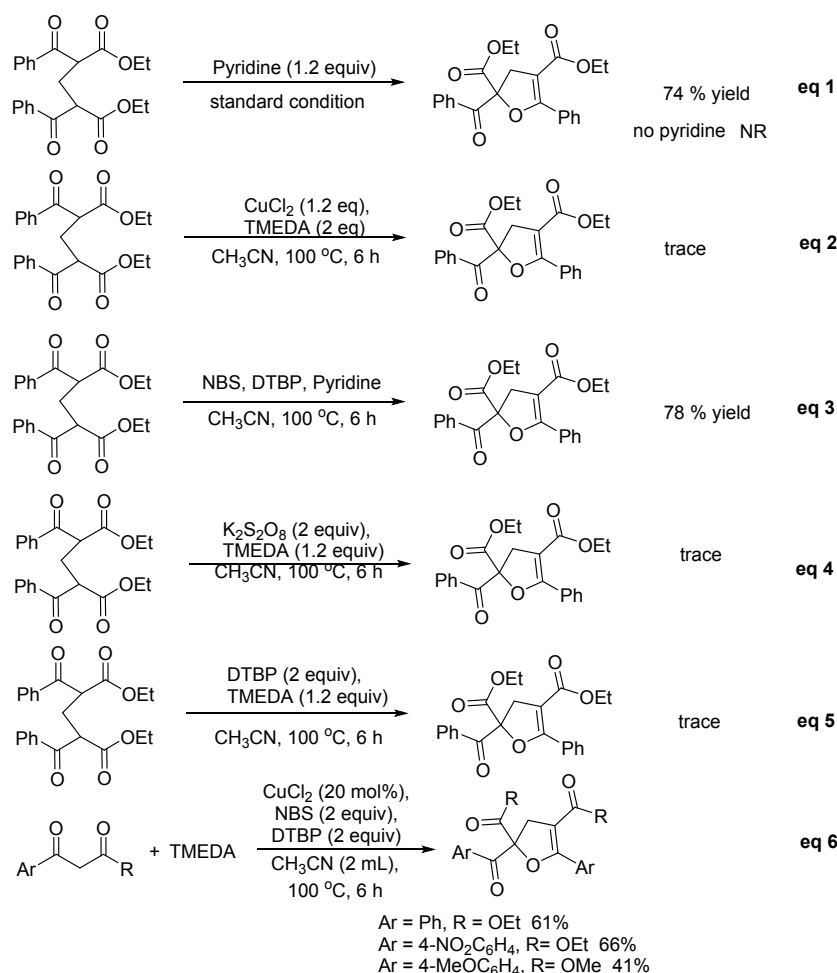

Copies of product  $^1\text{H}$  NMR and  $^{13}\text{C}$  NMR

g-14-3-24-1  
Gradient Shimming

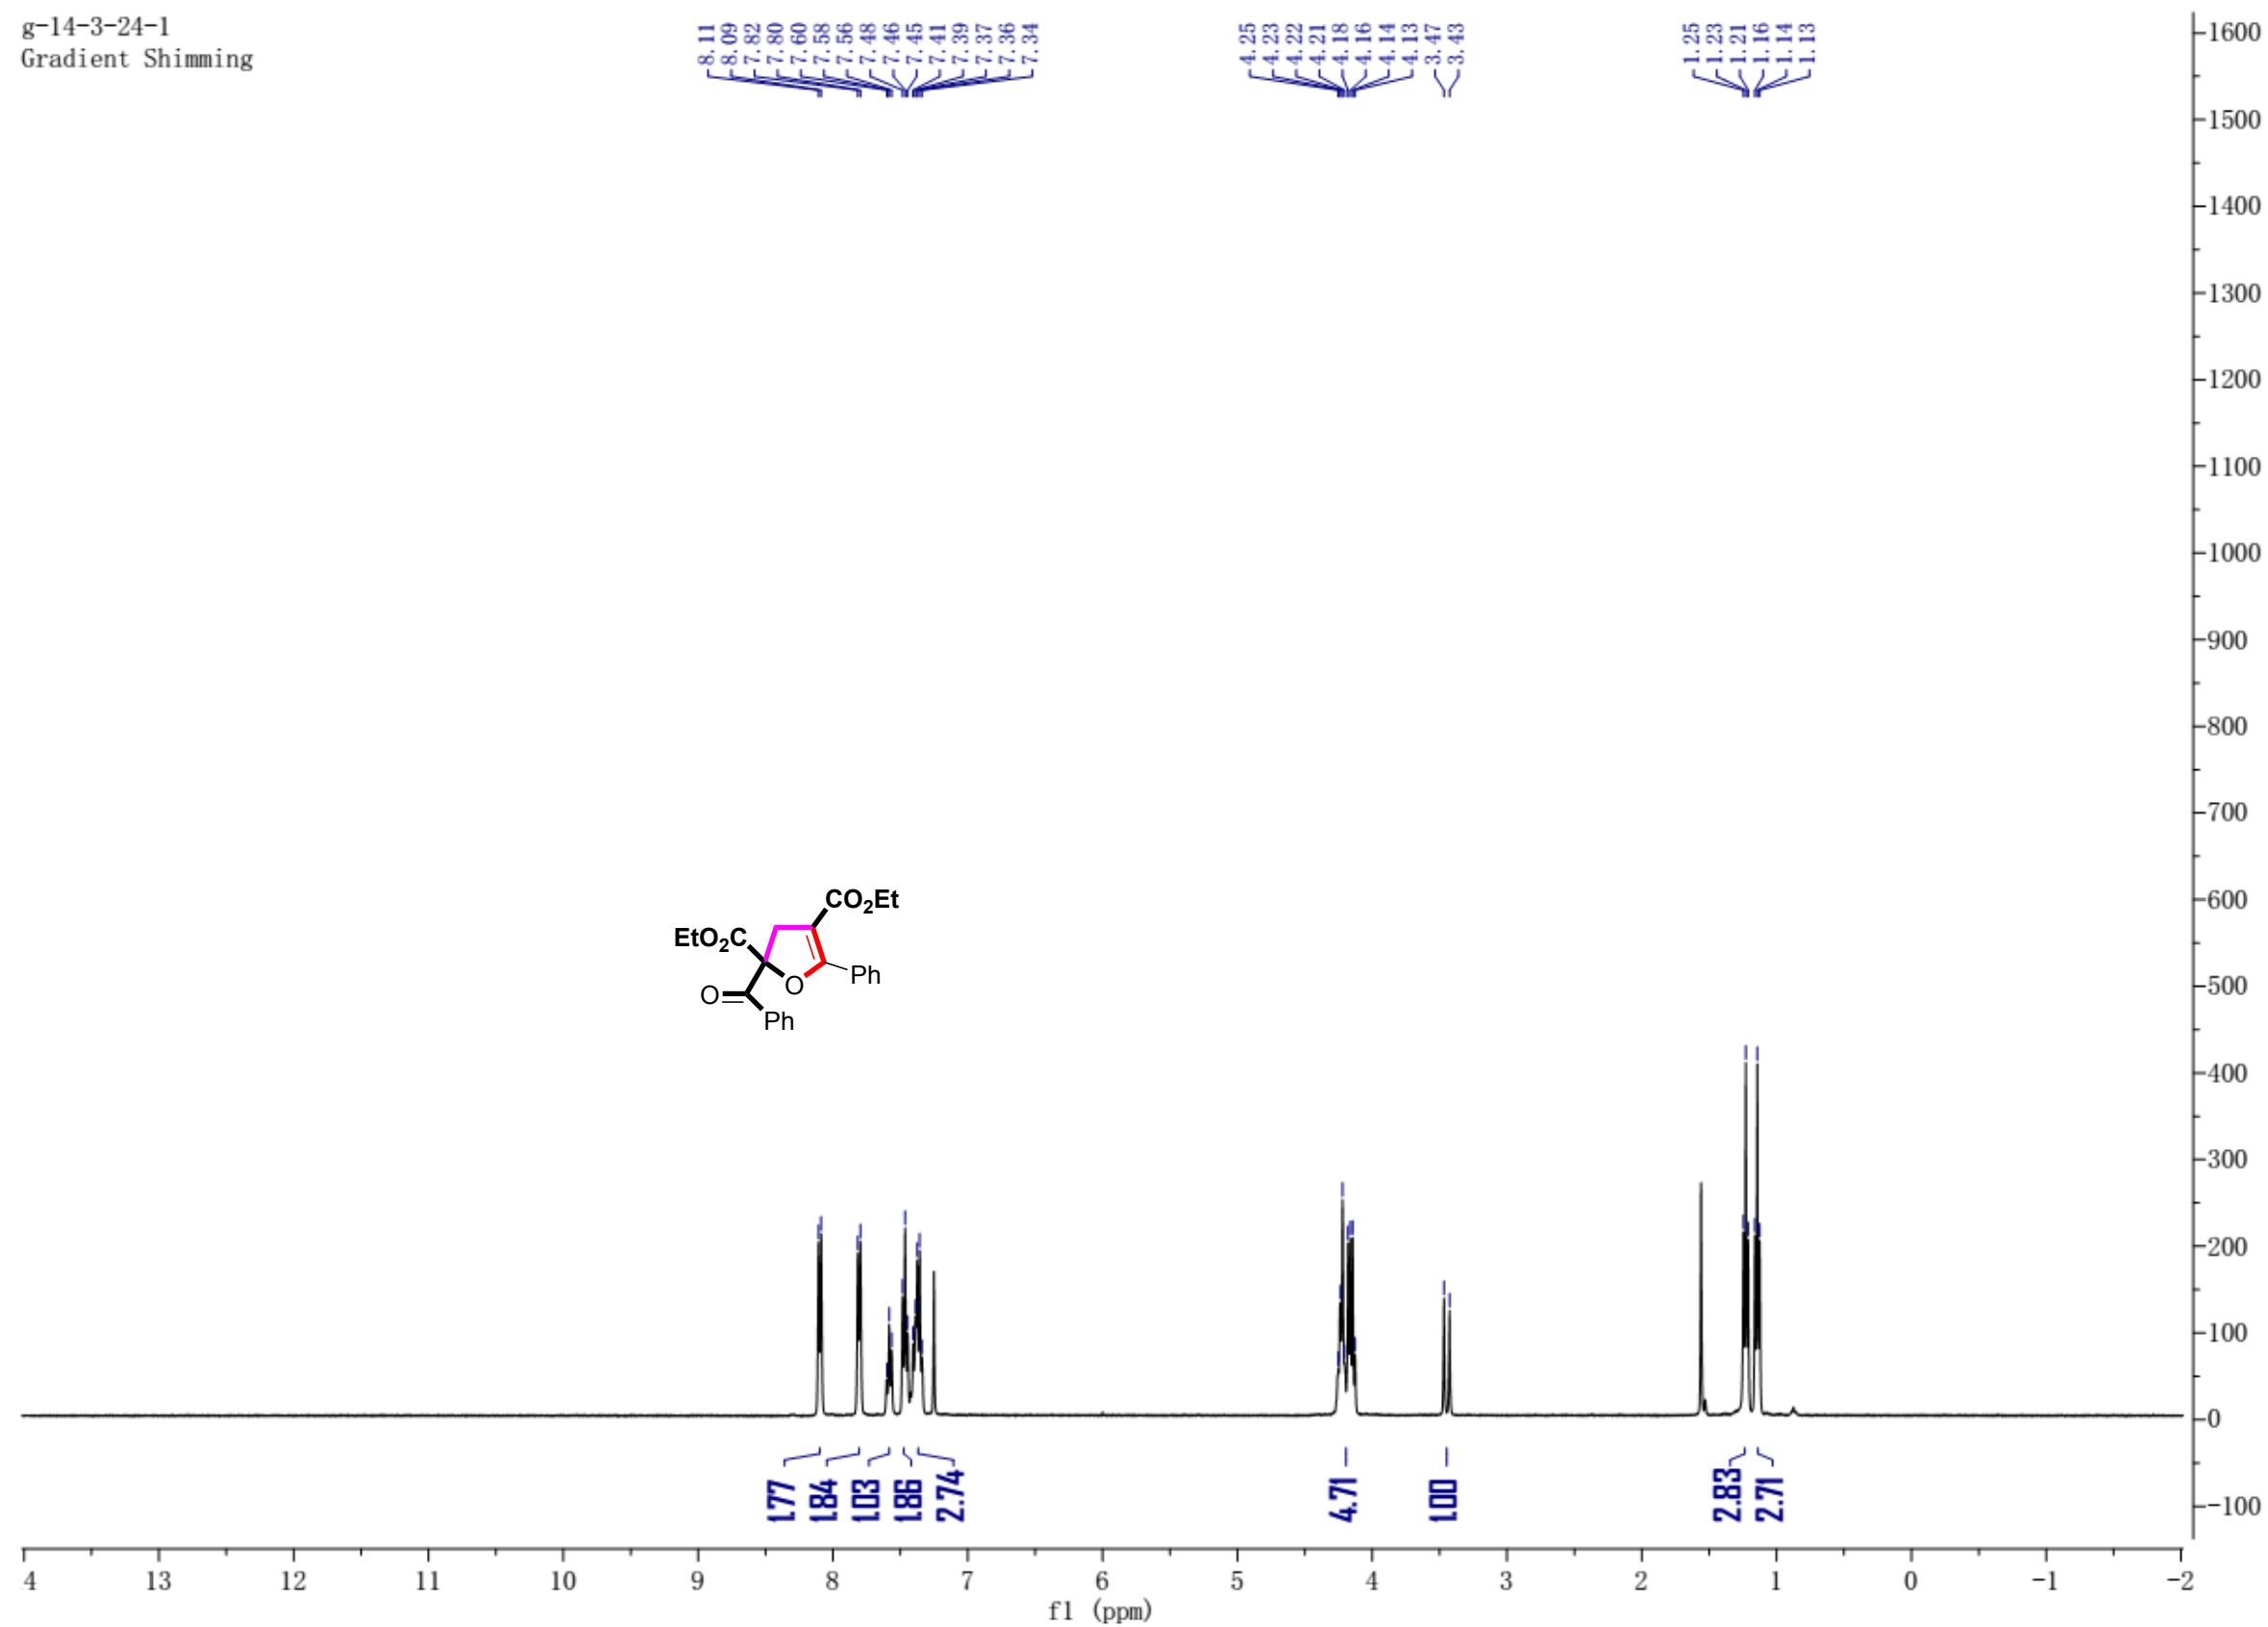

g-14-3-7-3-c  
Gradient Shimming

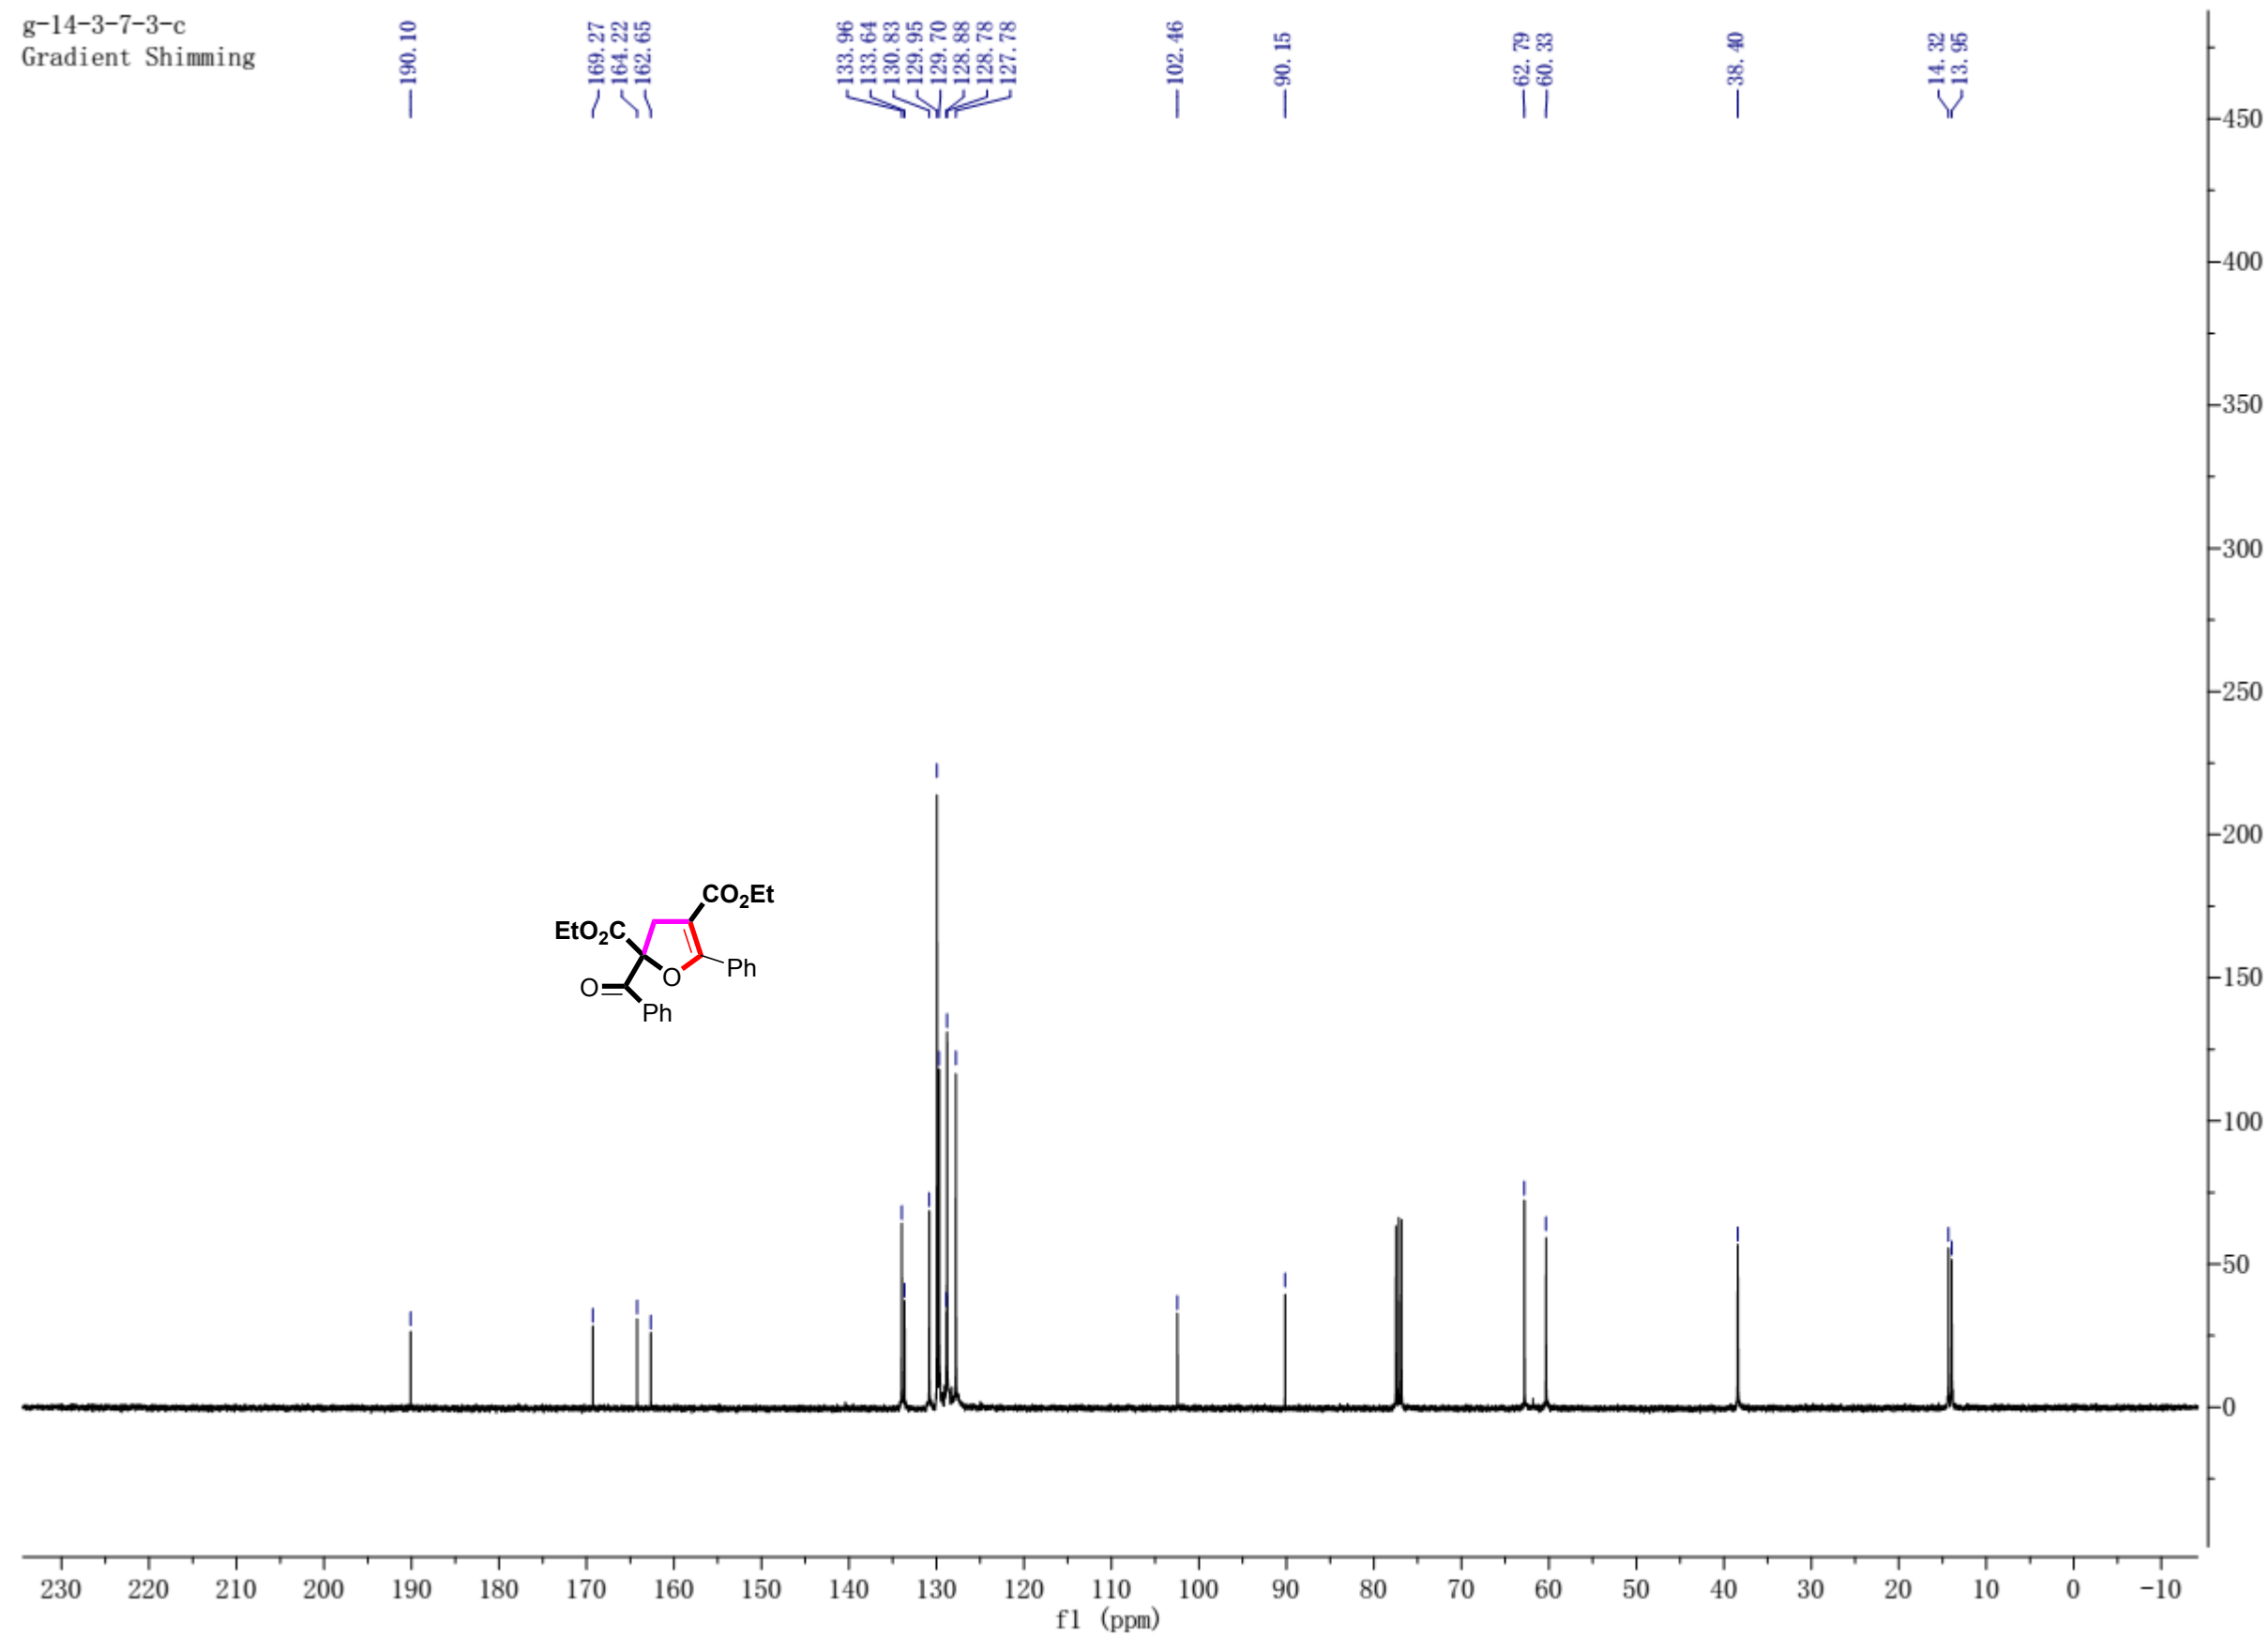

g-2014-4-18-5  
STANDARD CARBON PARAMETERS

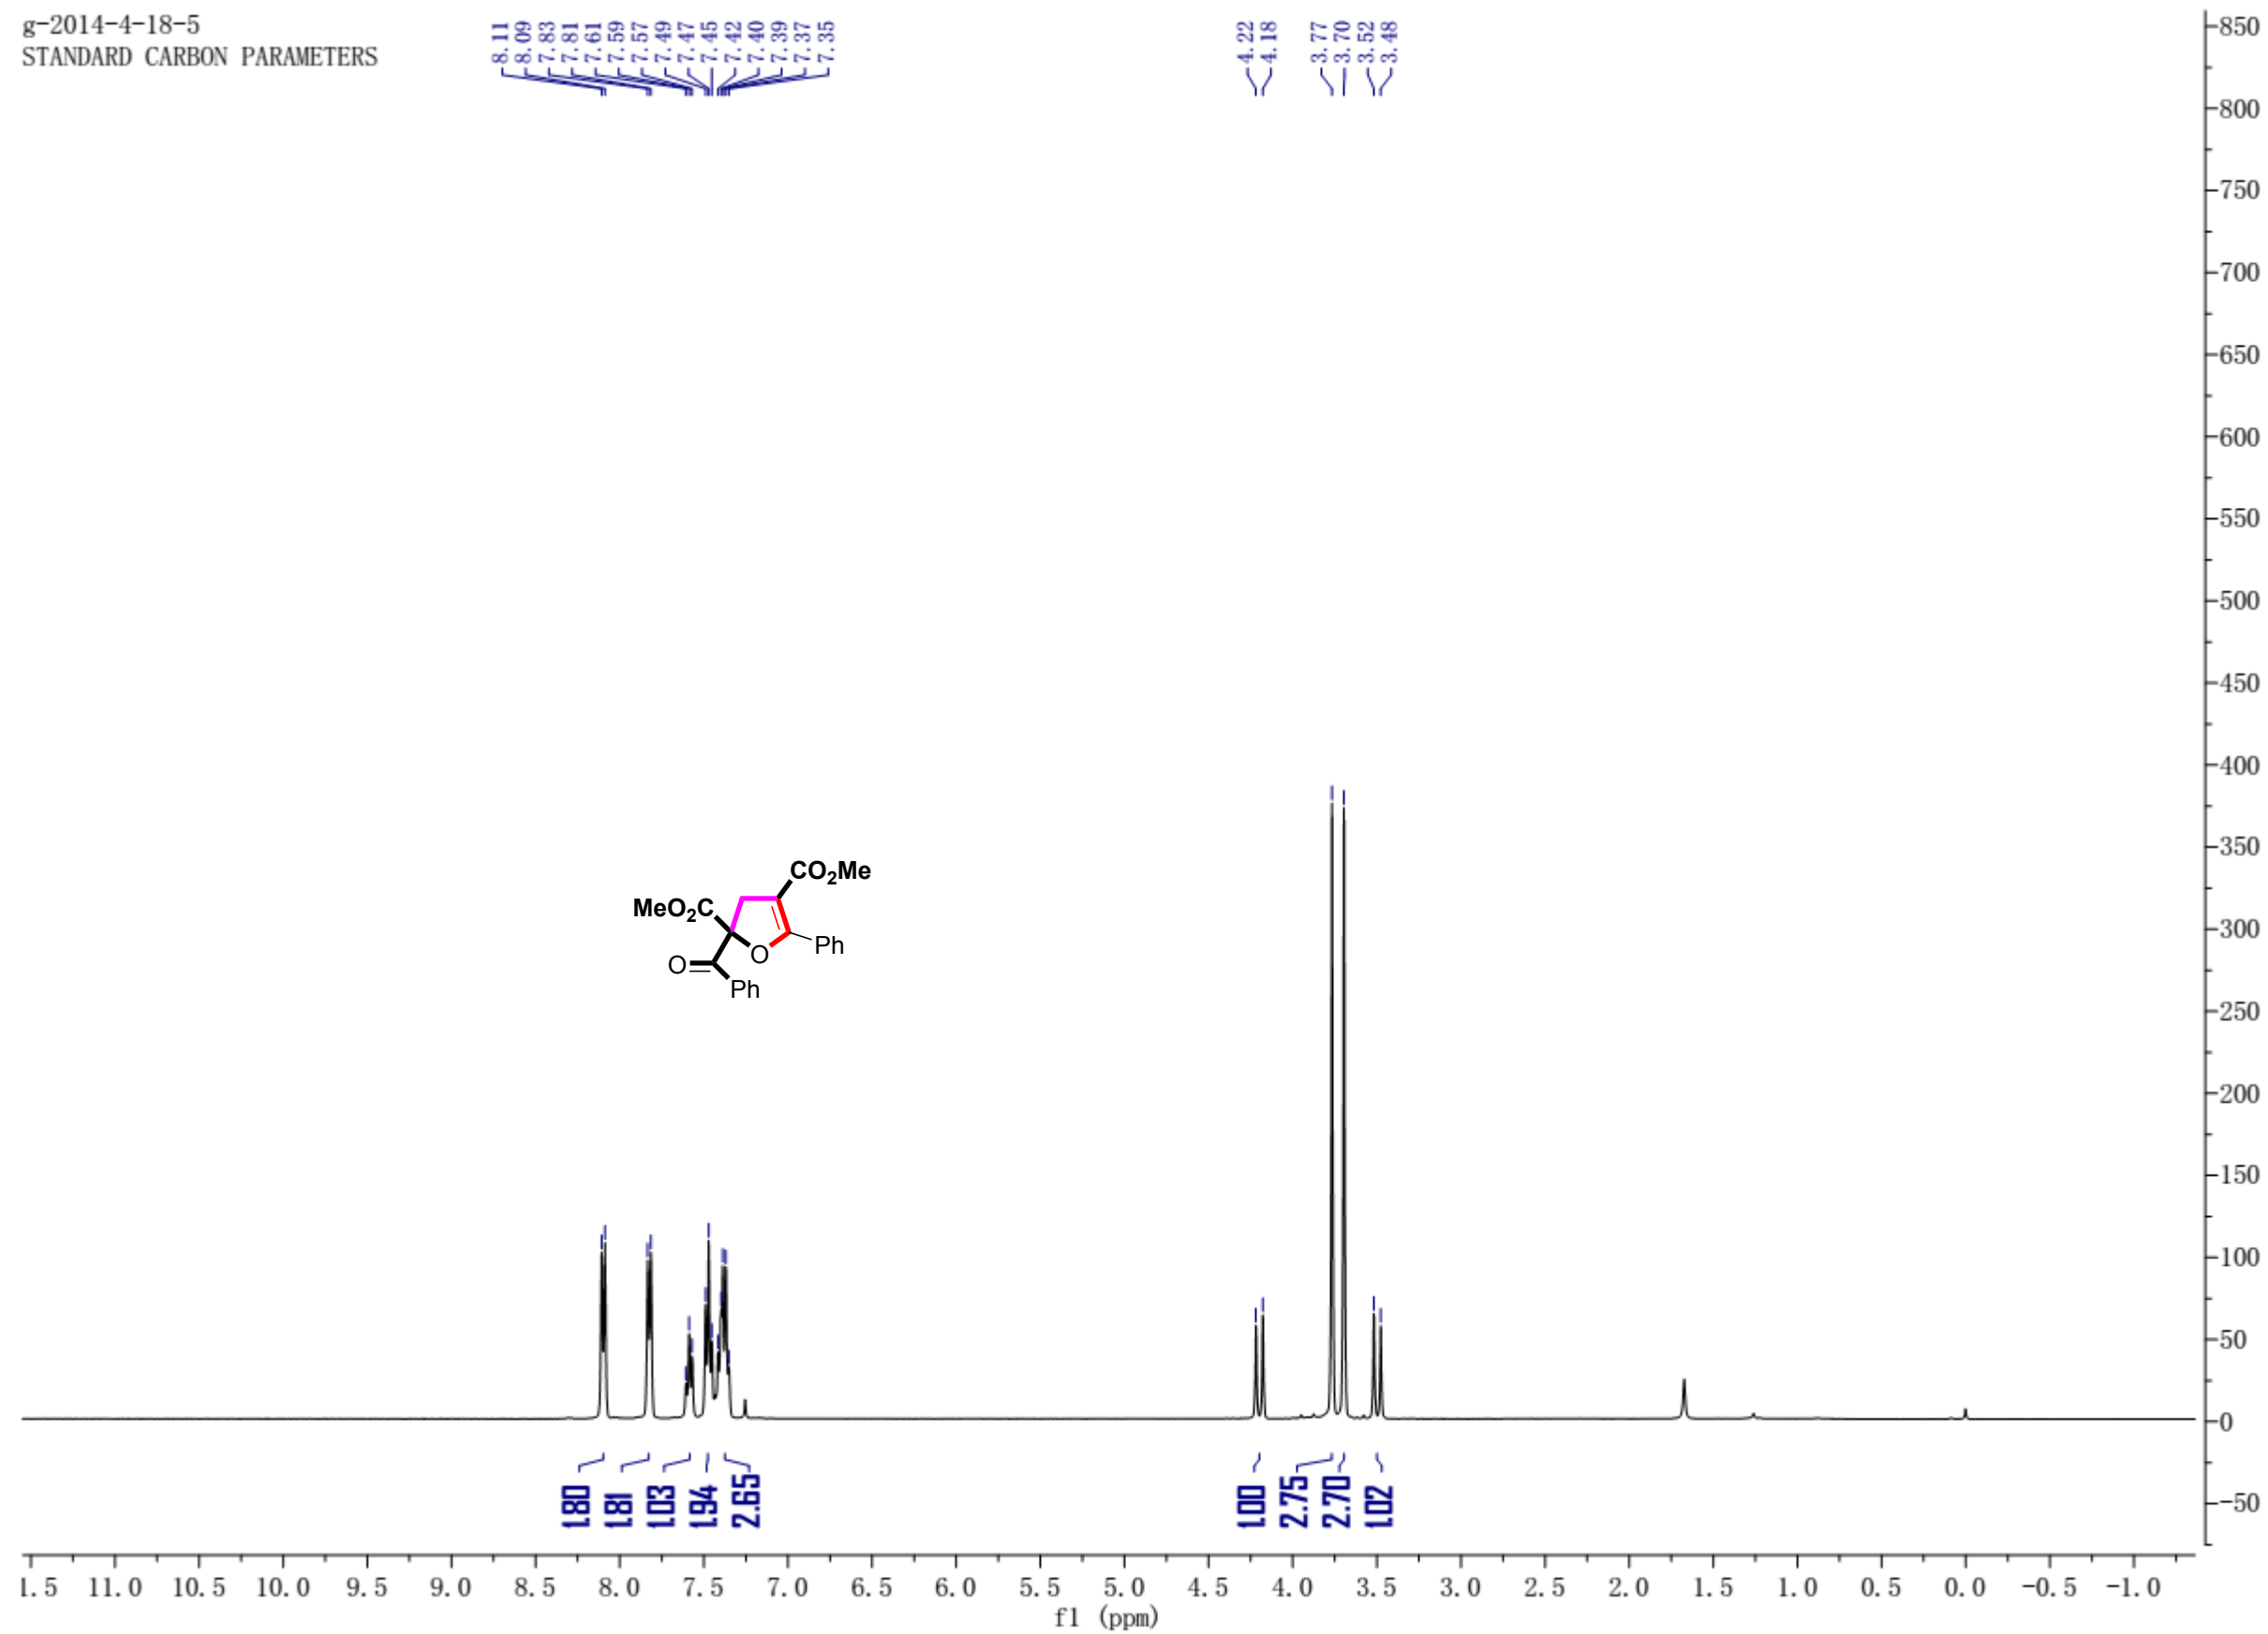

g-2014-4-18-5-c

STANDARD CARBON PARAMETERS

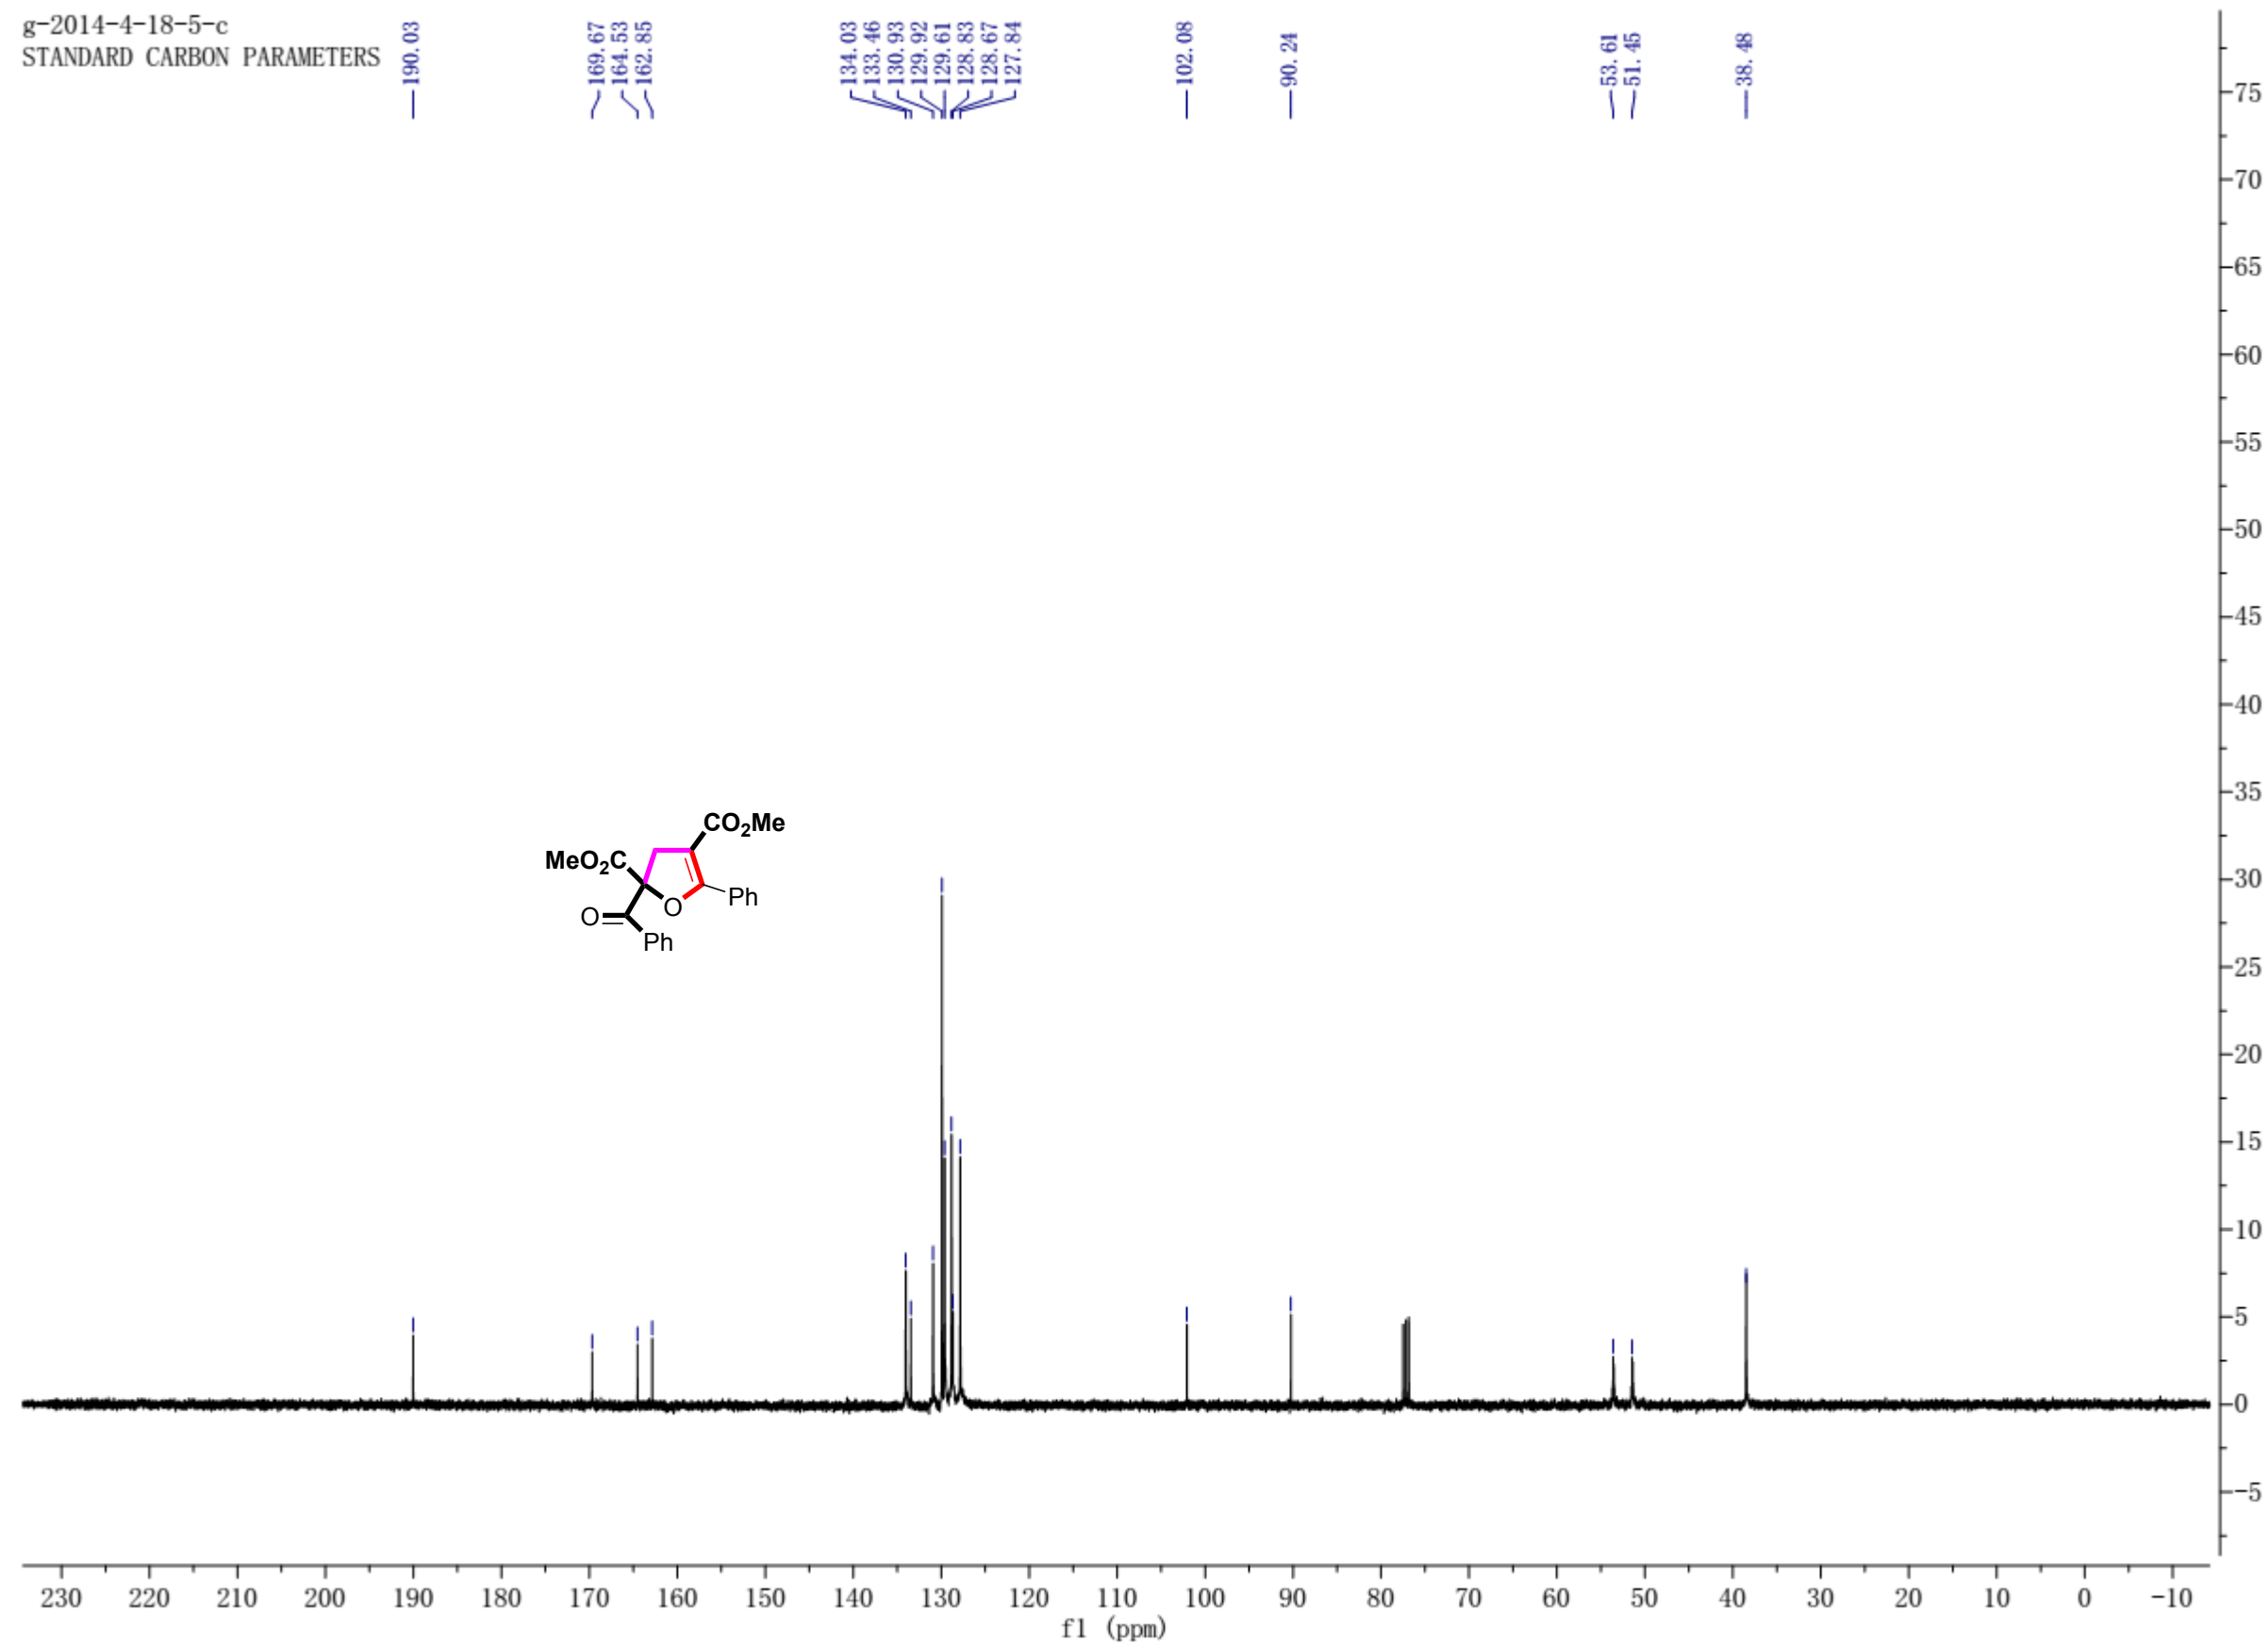



g-2014-4-18-8  
STANDARD CARBON PARAMETERS

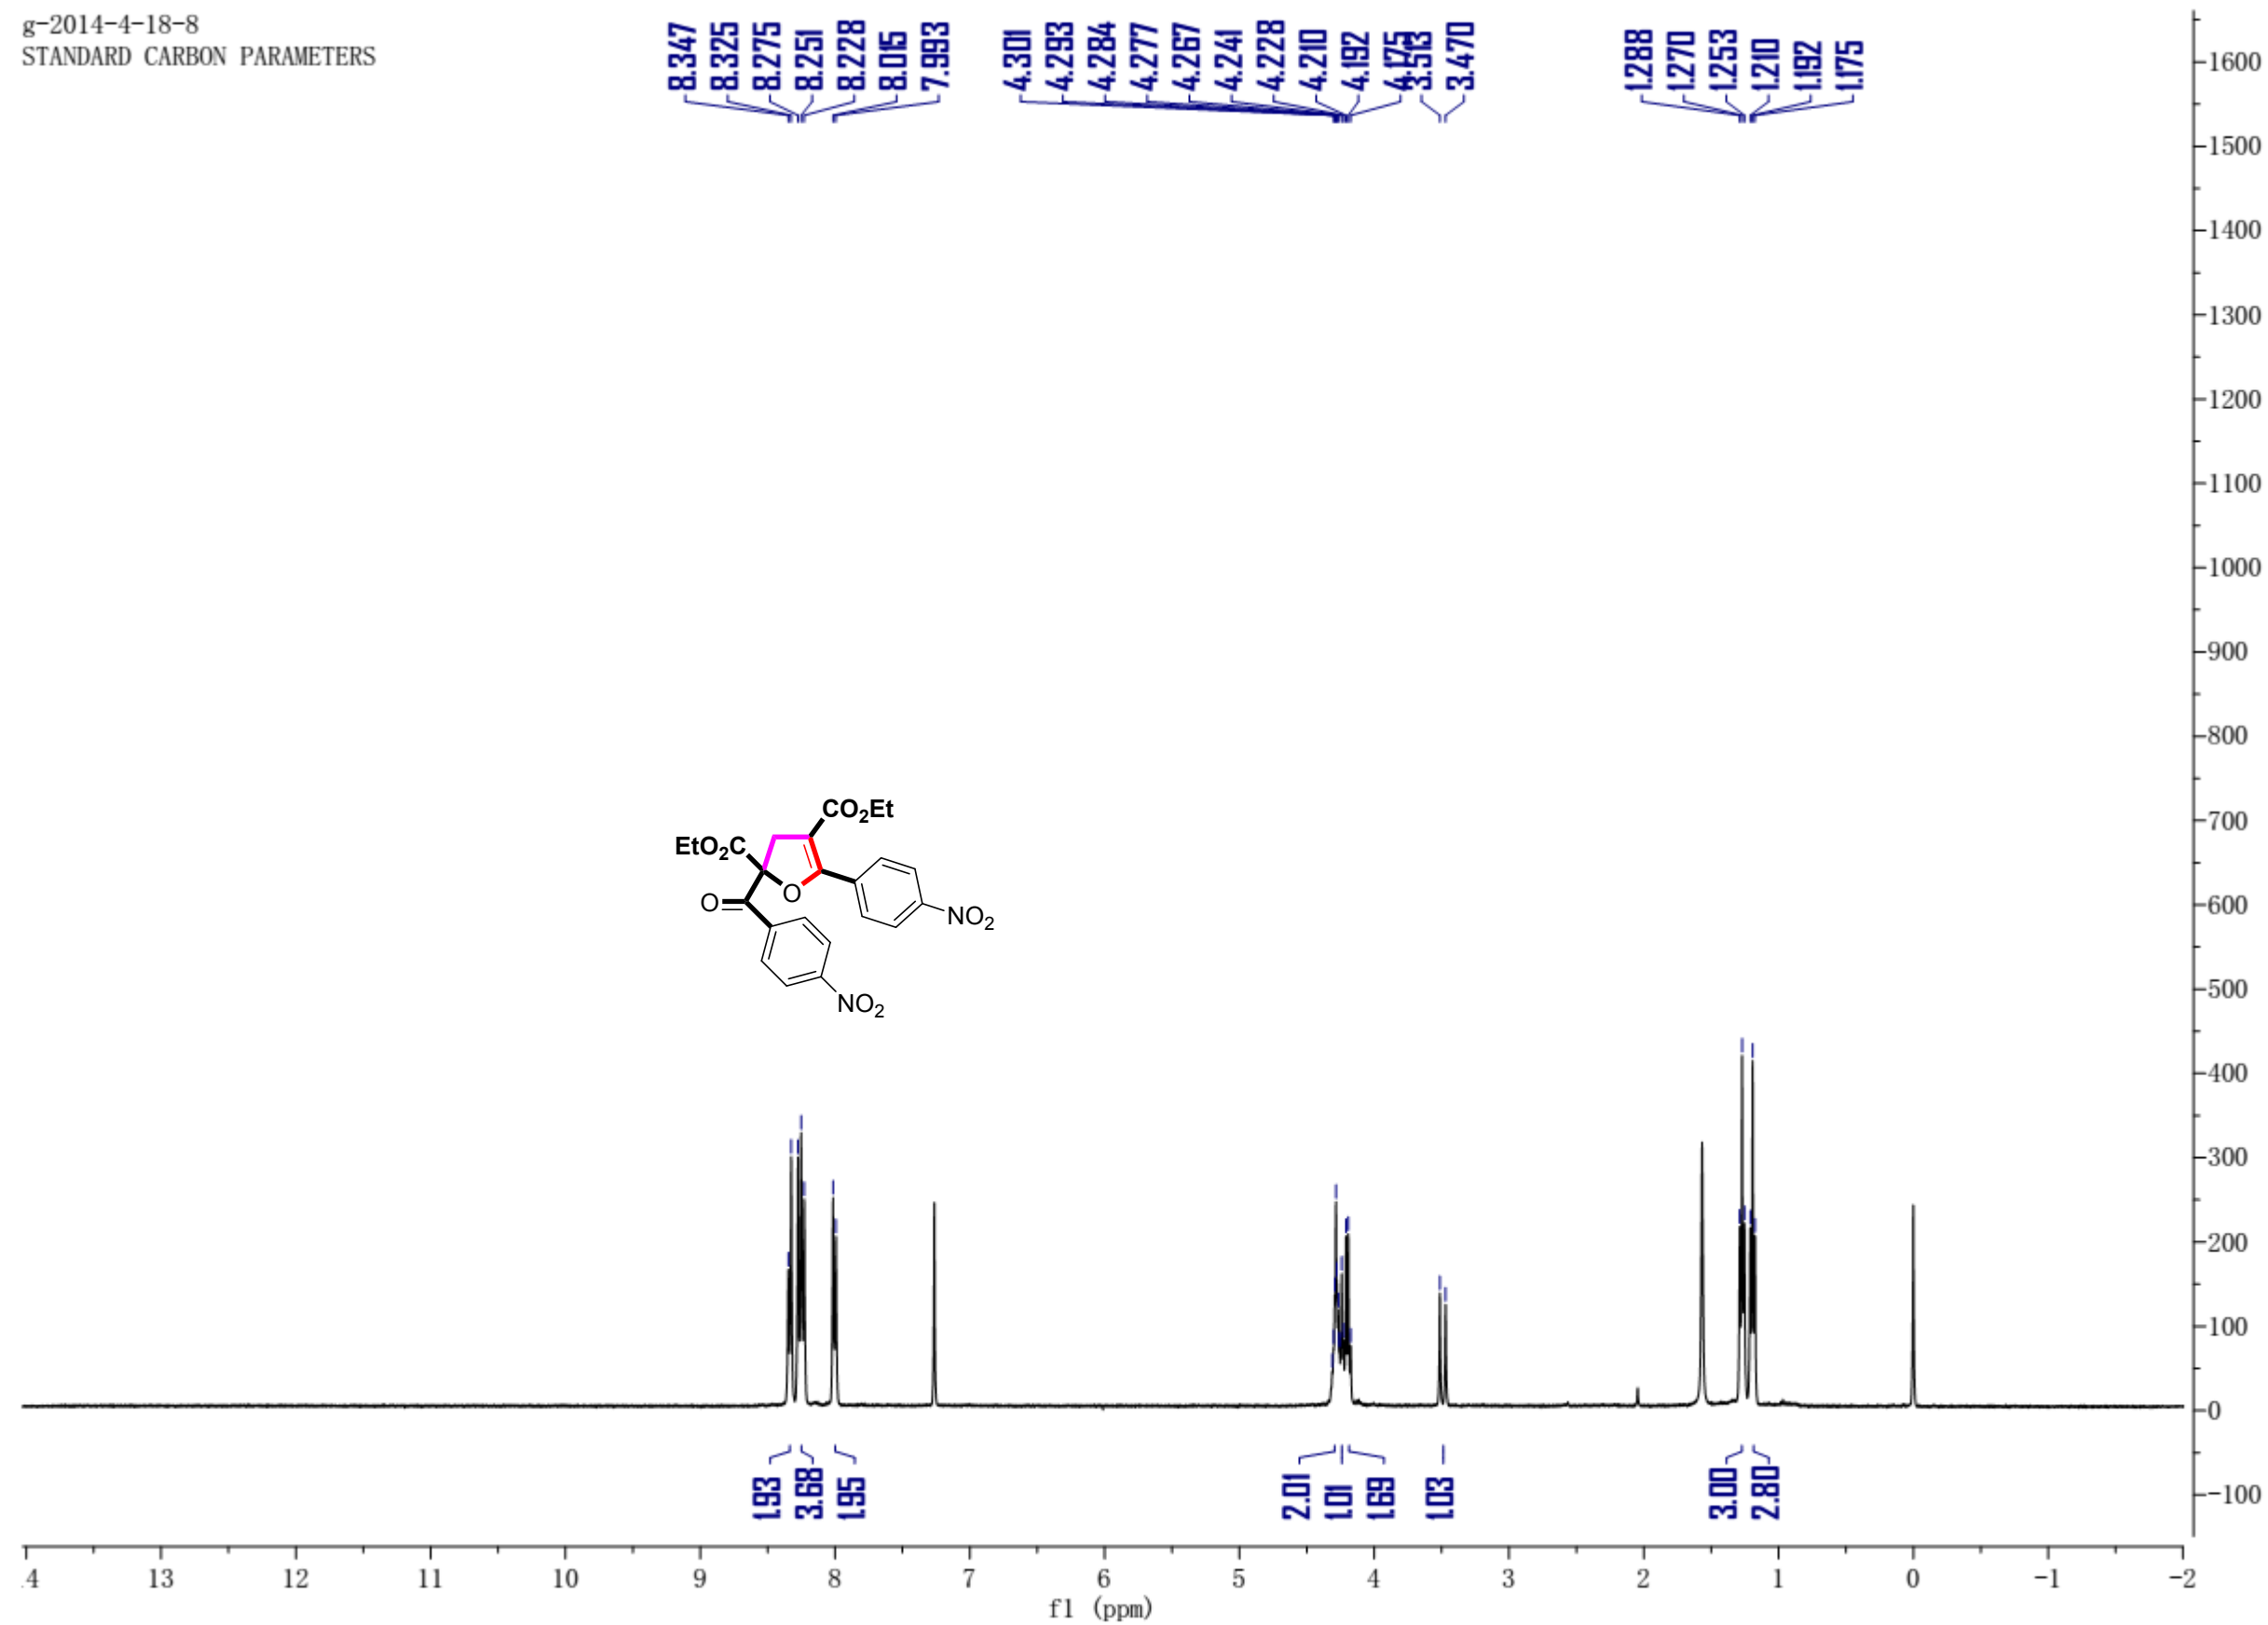

g-2014-4-18-8-c

STANDARD CARBON PARAMETERS

188.46

168.39

163.37

159.49

150.88

149.00

137.99

134.48

131.01

130.73

124.05

123.13

105.70

90.29

63.51

61.02

38.52

14.31

14.03

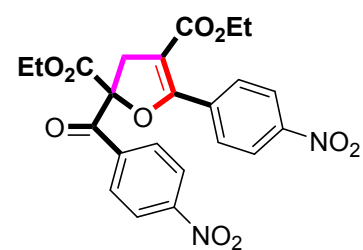

230 220 210 200 190 180 170 160 150 140 130 120 110 100 90 80 70 60 50 40 30 20 10 0 -10

f1 (ppm)

g-2014-4-26-4  
STANDARD CARBON PARAMETERS

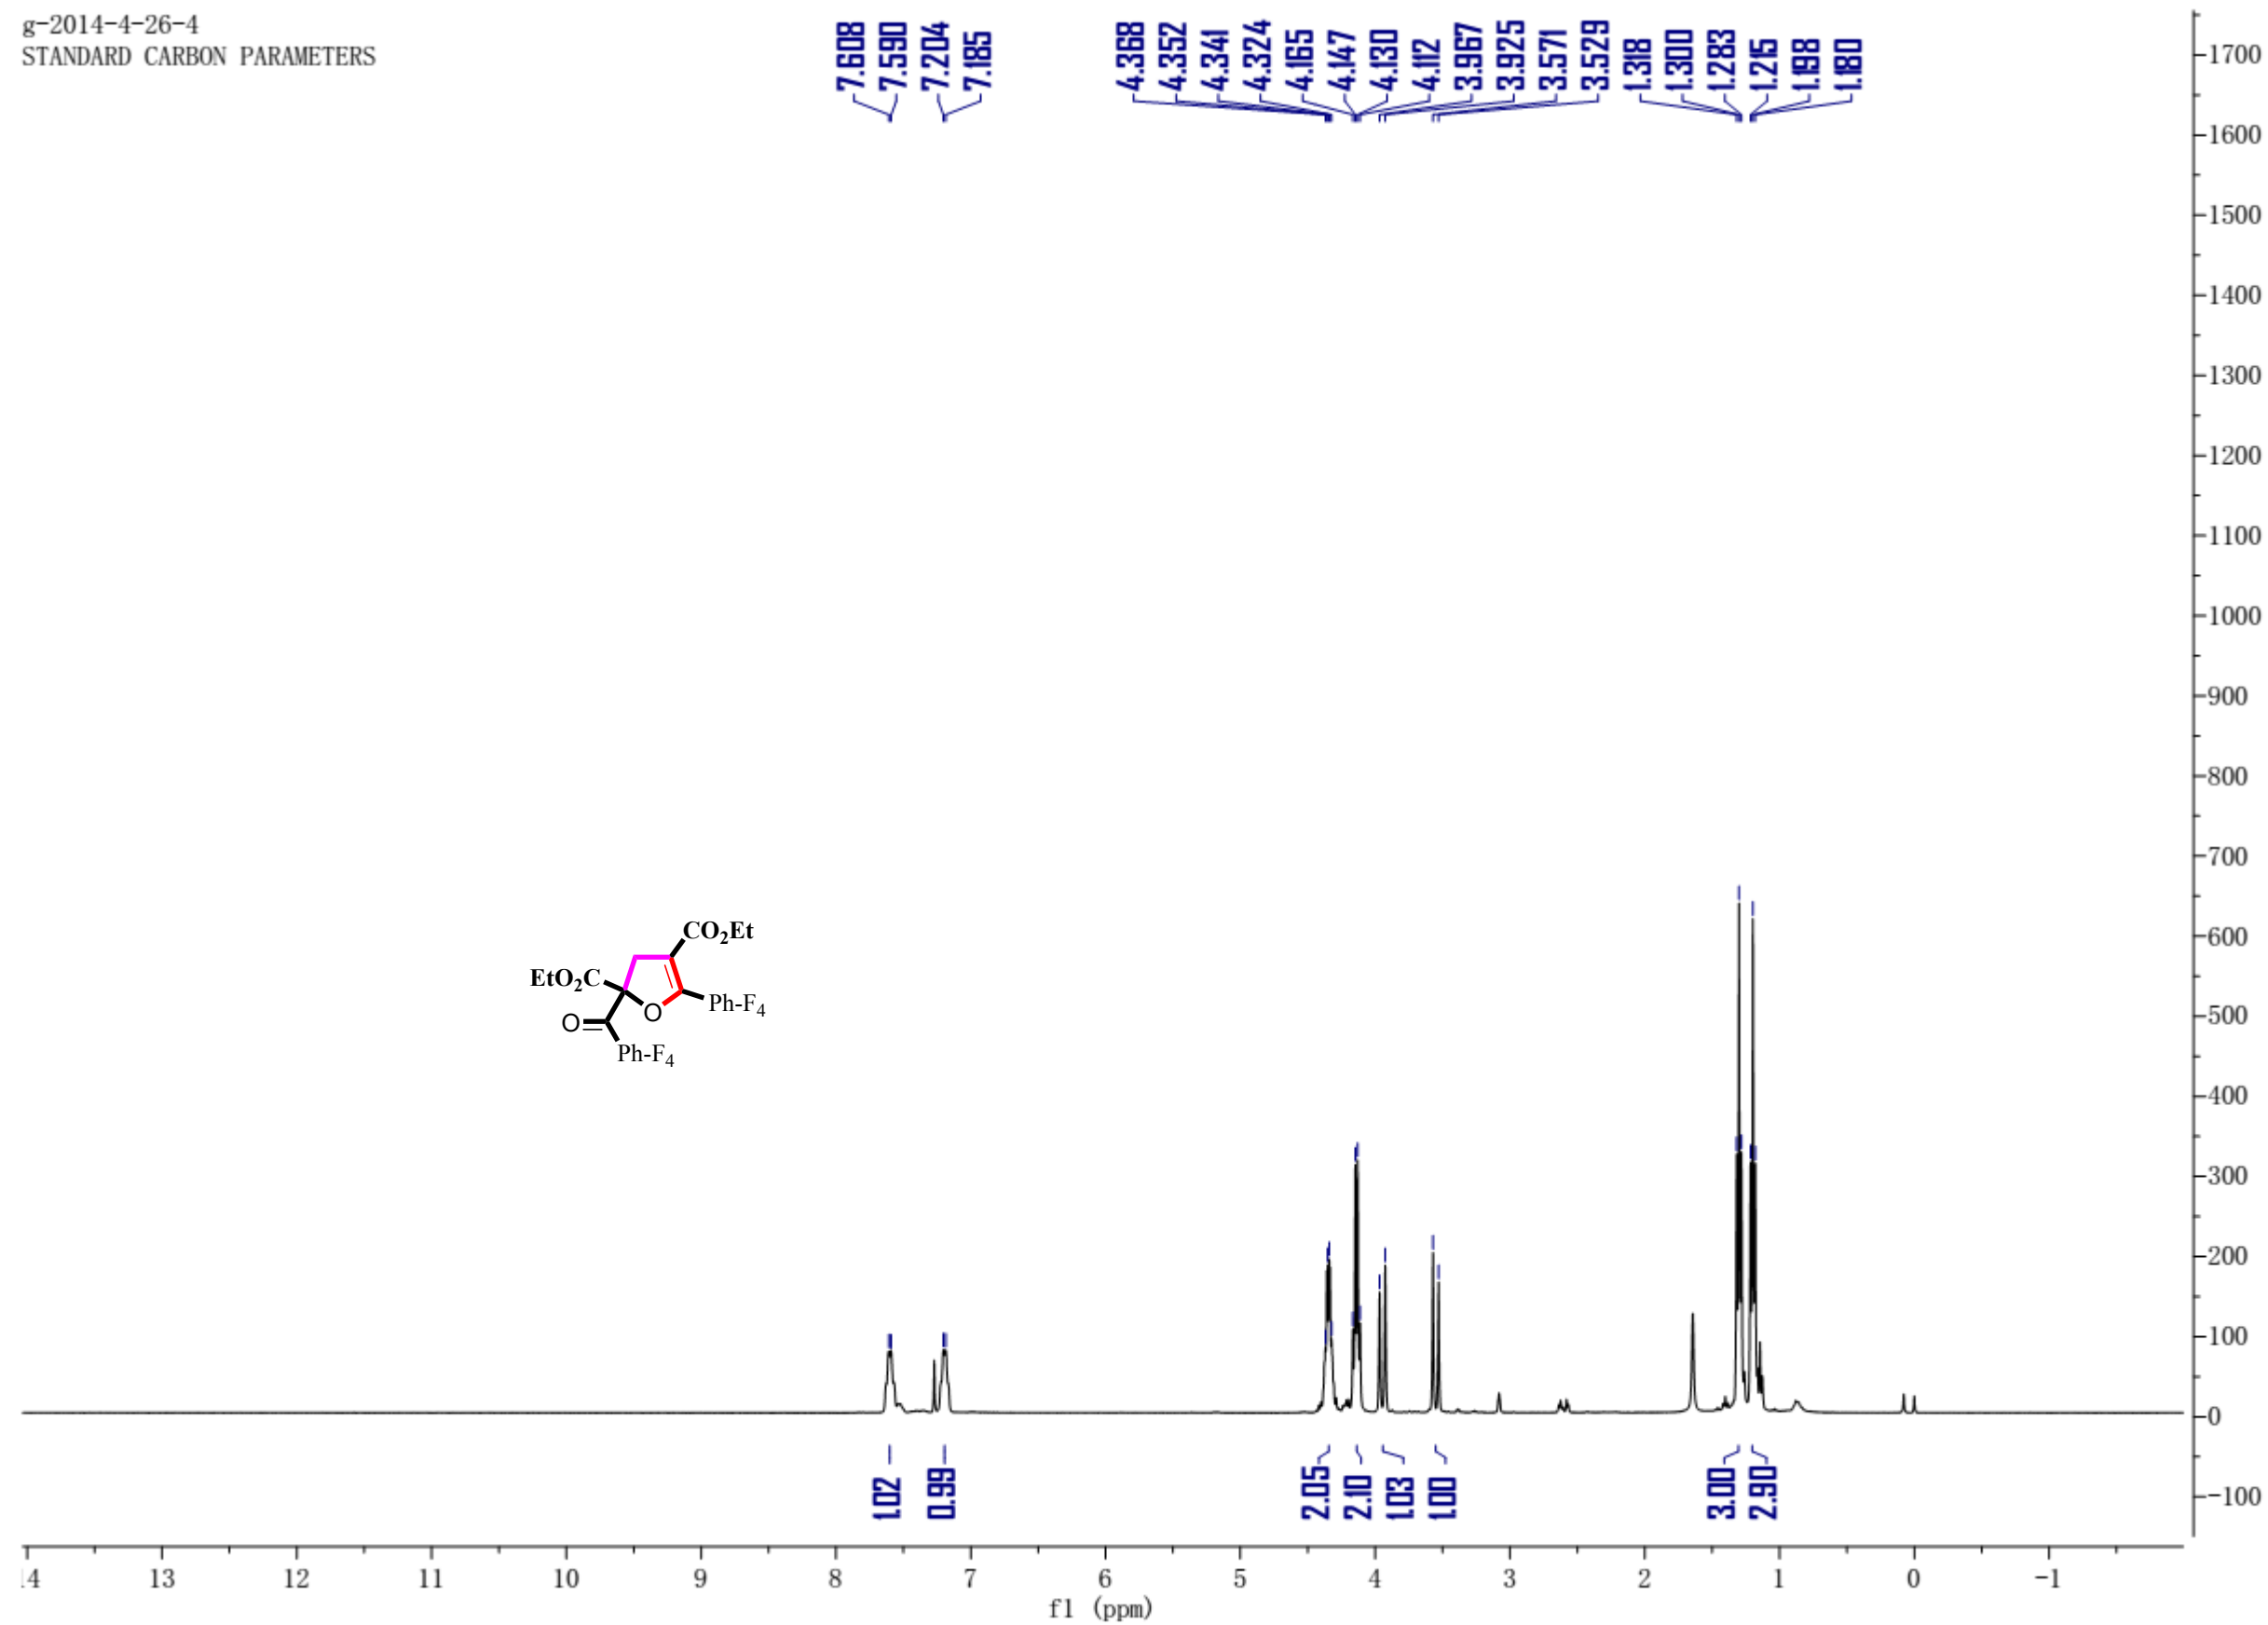

g-2014-4-26-4-c

STANDARD CARBON PARAMETERS

187.39  
186.85

166.86

162.75

154.17

148.59

148.00

146.07

145.45

142.95

142.40

140.83

139.71

112.60

107.49

91.62

62.88

60.90

38.12

14.06

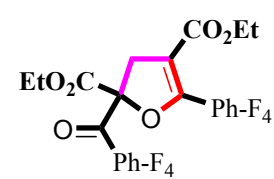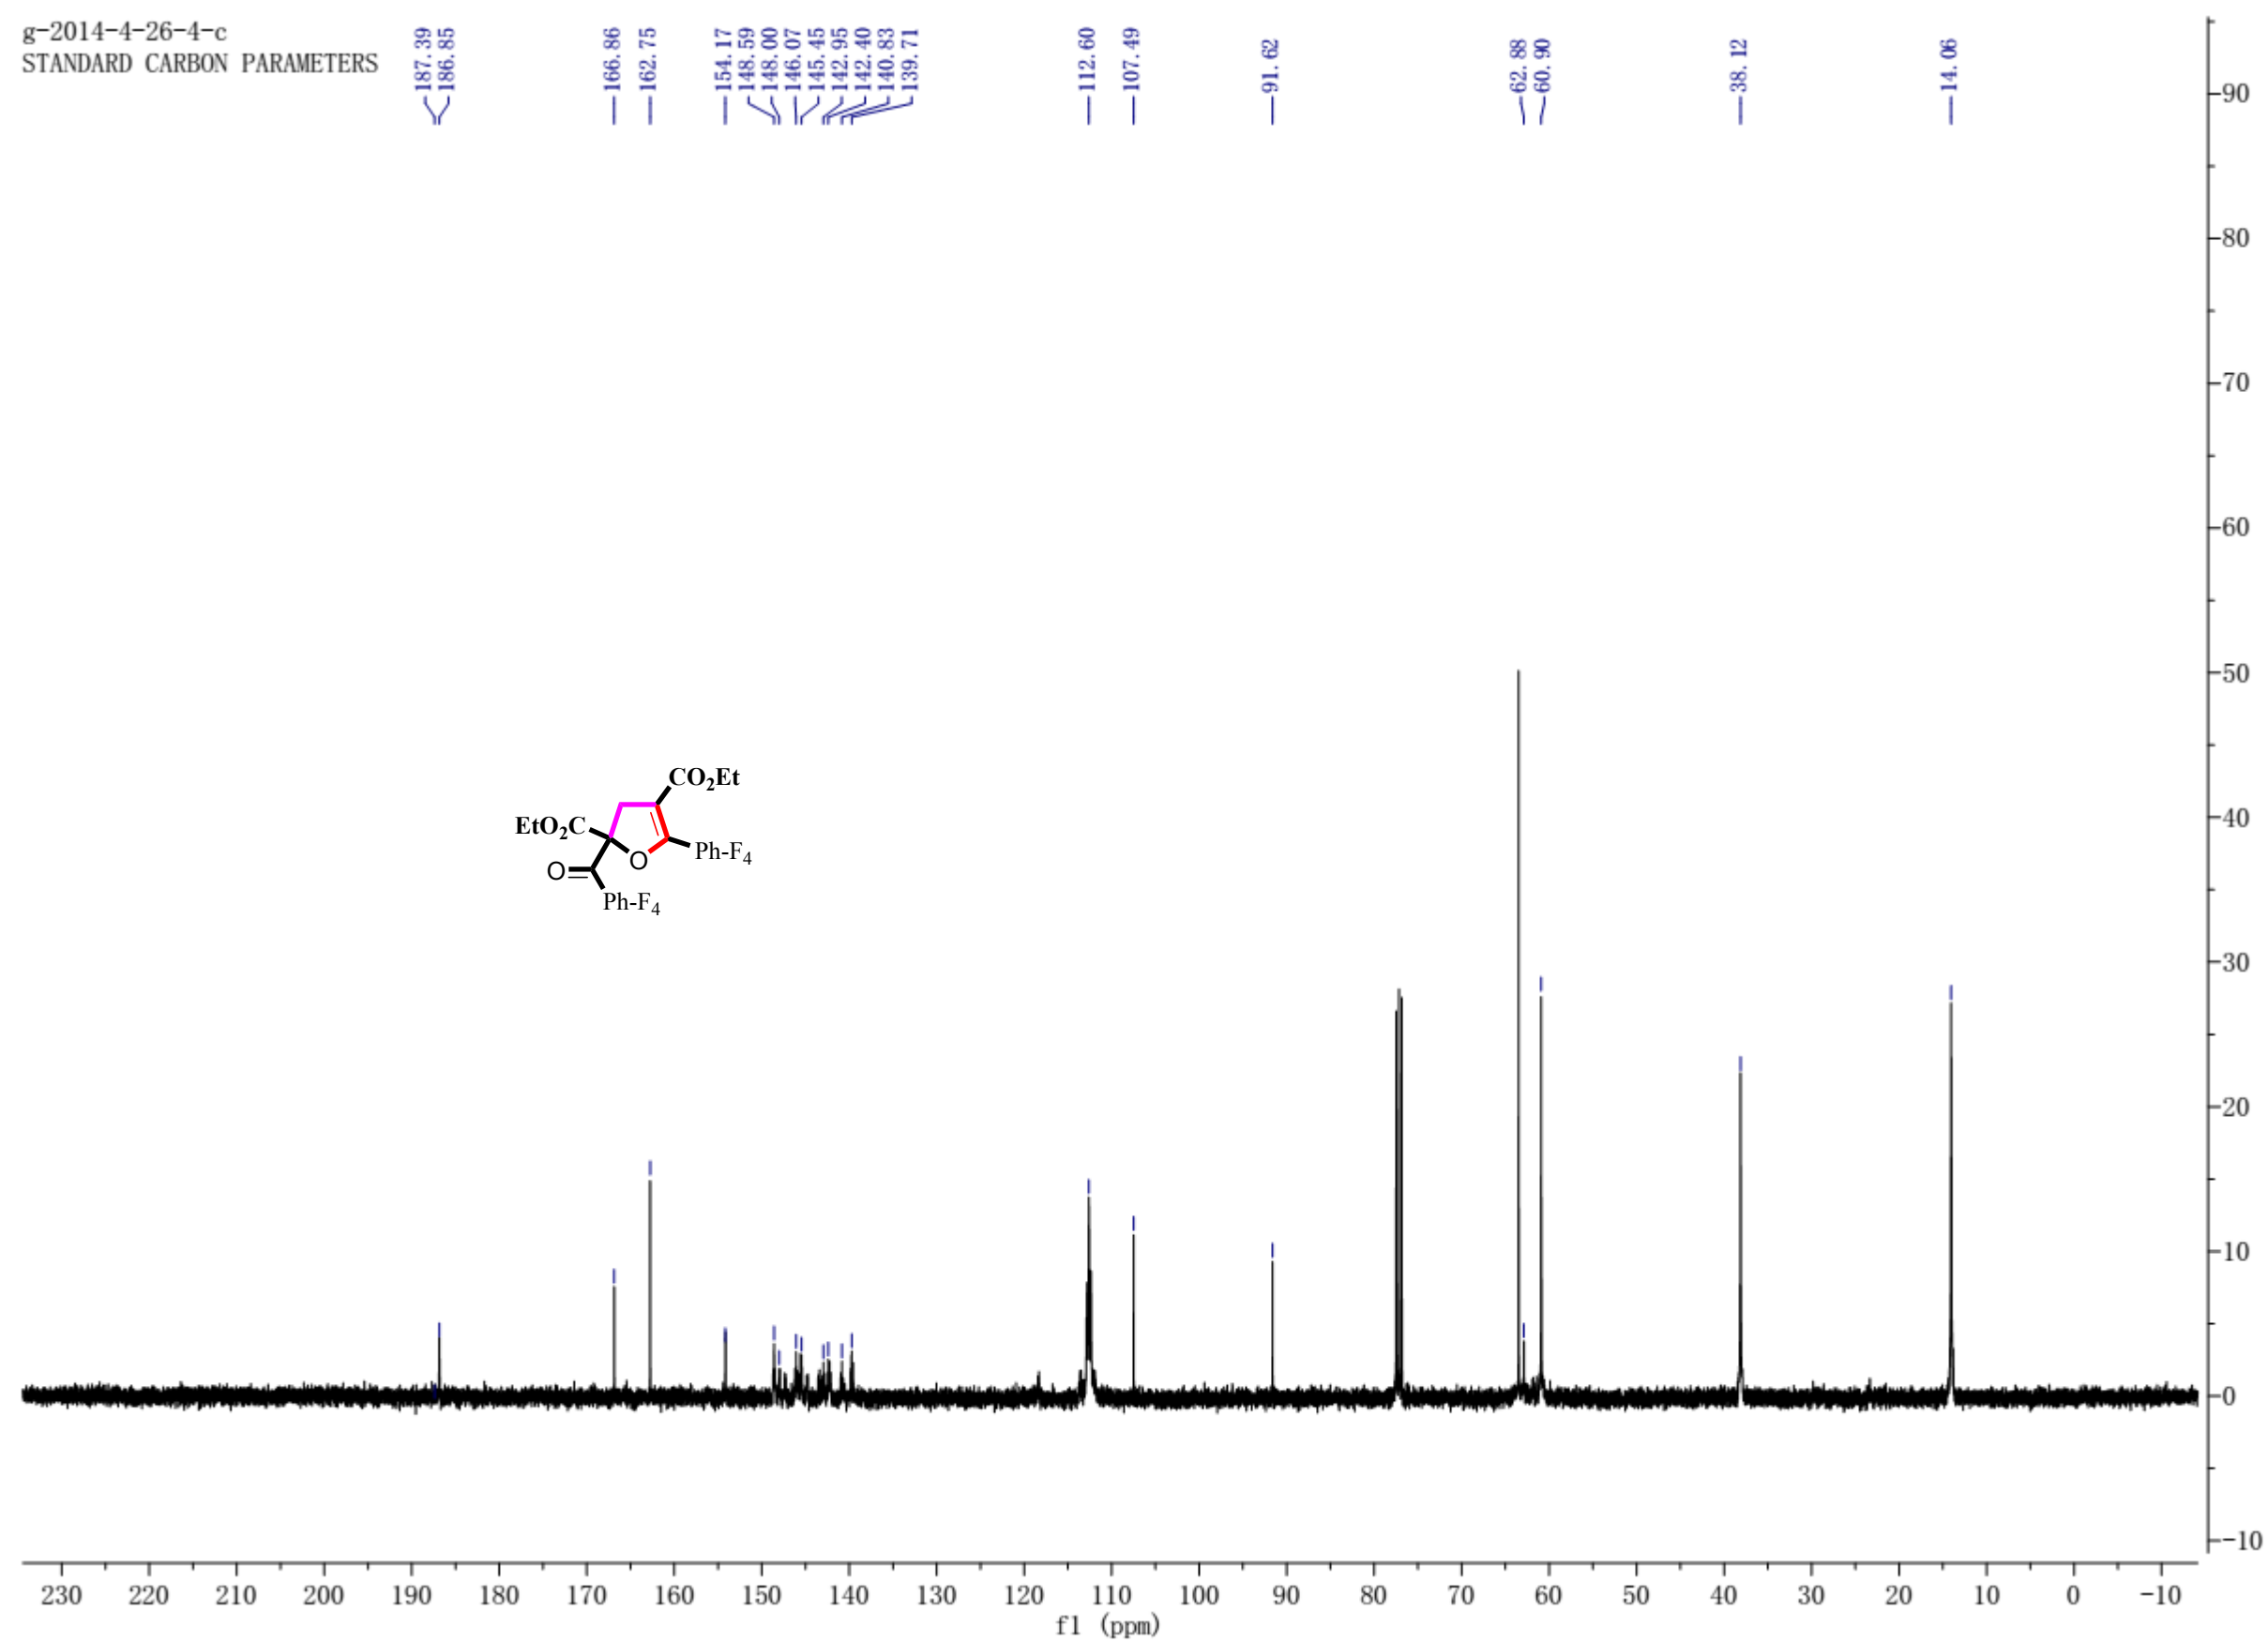

g-2014-4-18-12  
STANDARD CARBON PARAMETERS

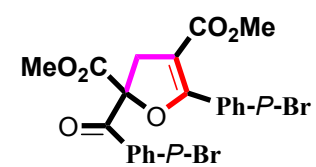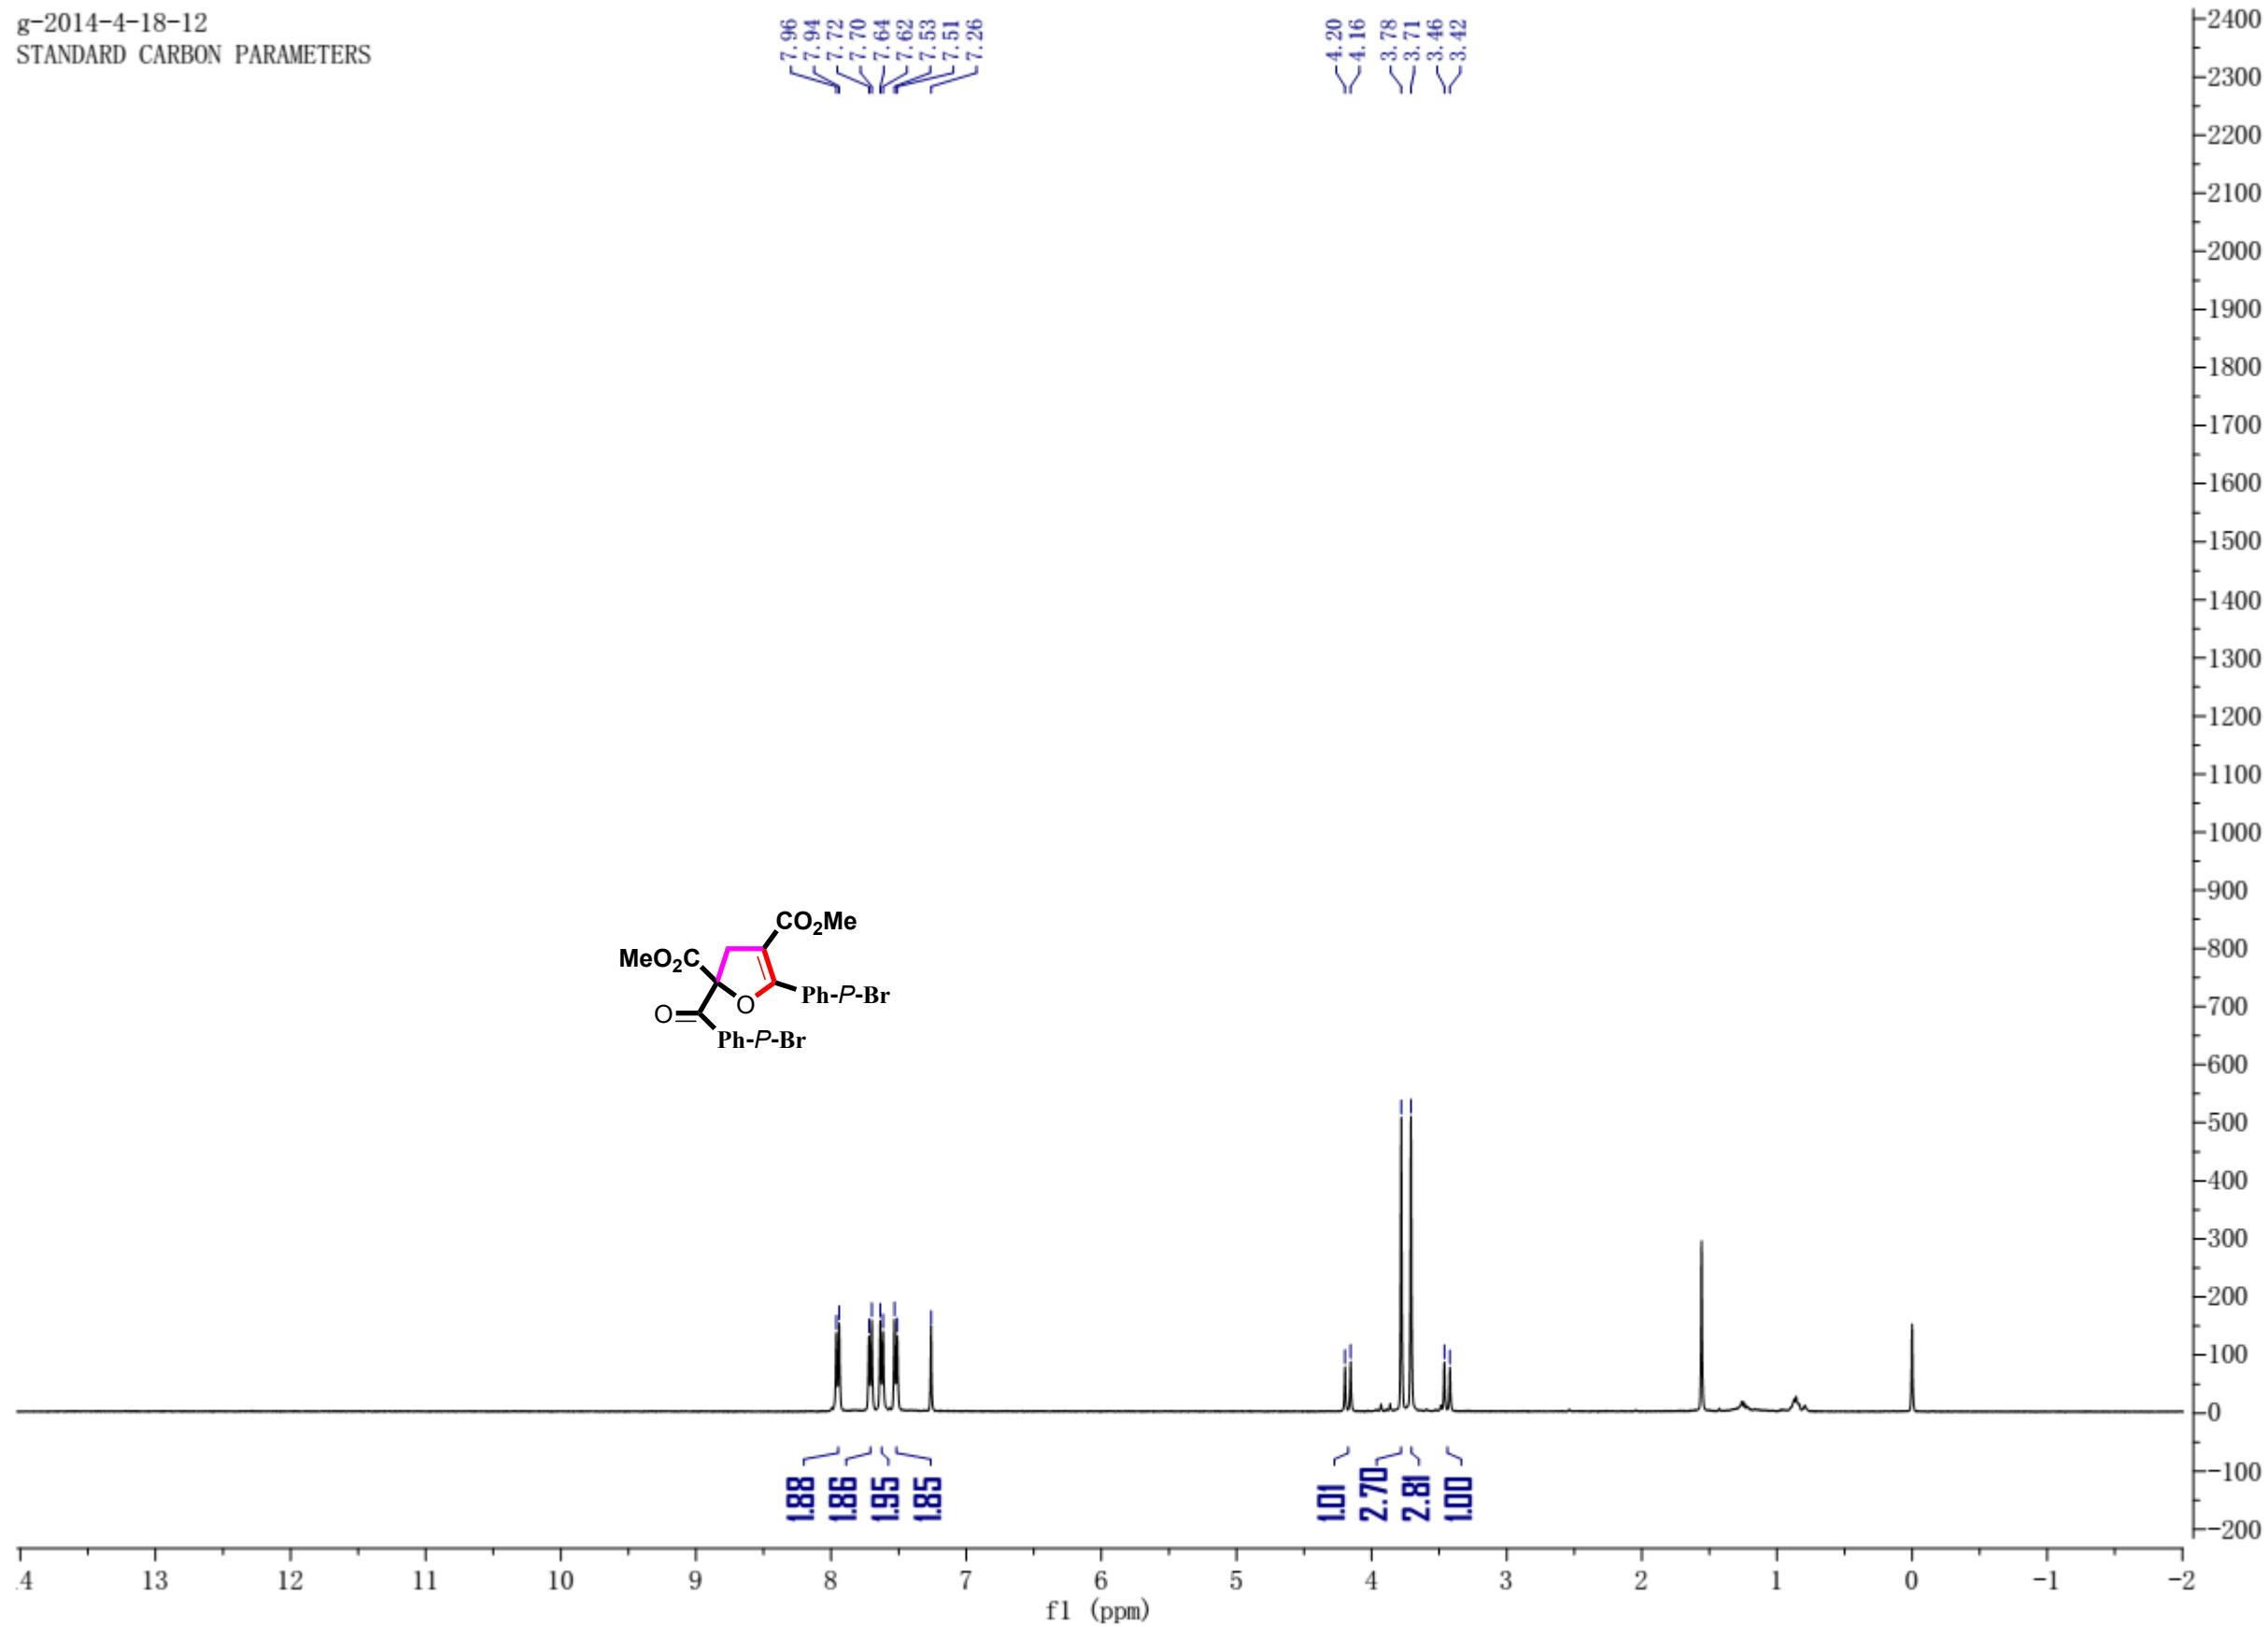

g-2014-4-18-12-c

STANDARD CARBON PARAMETERS

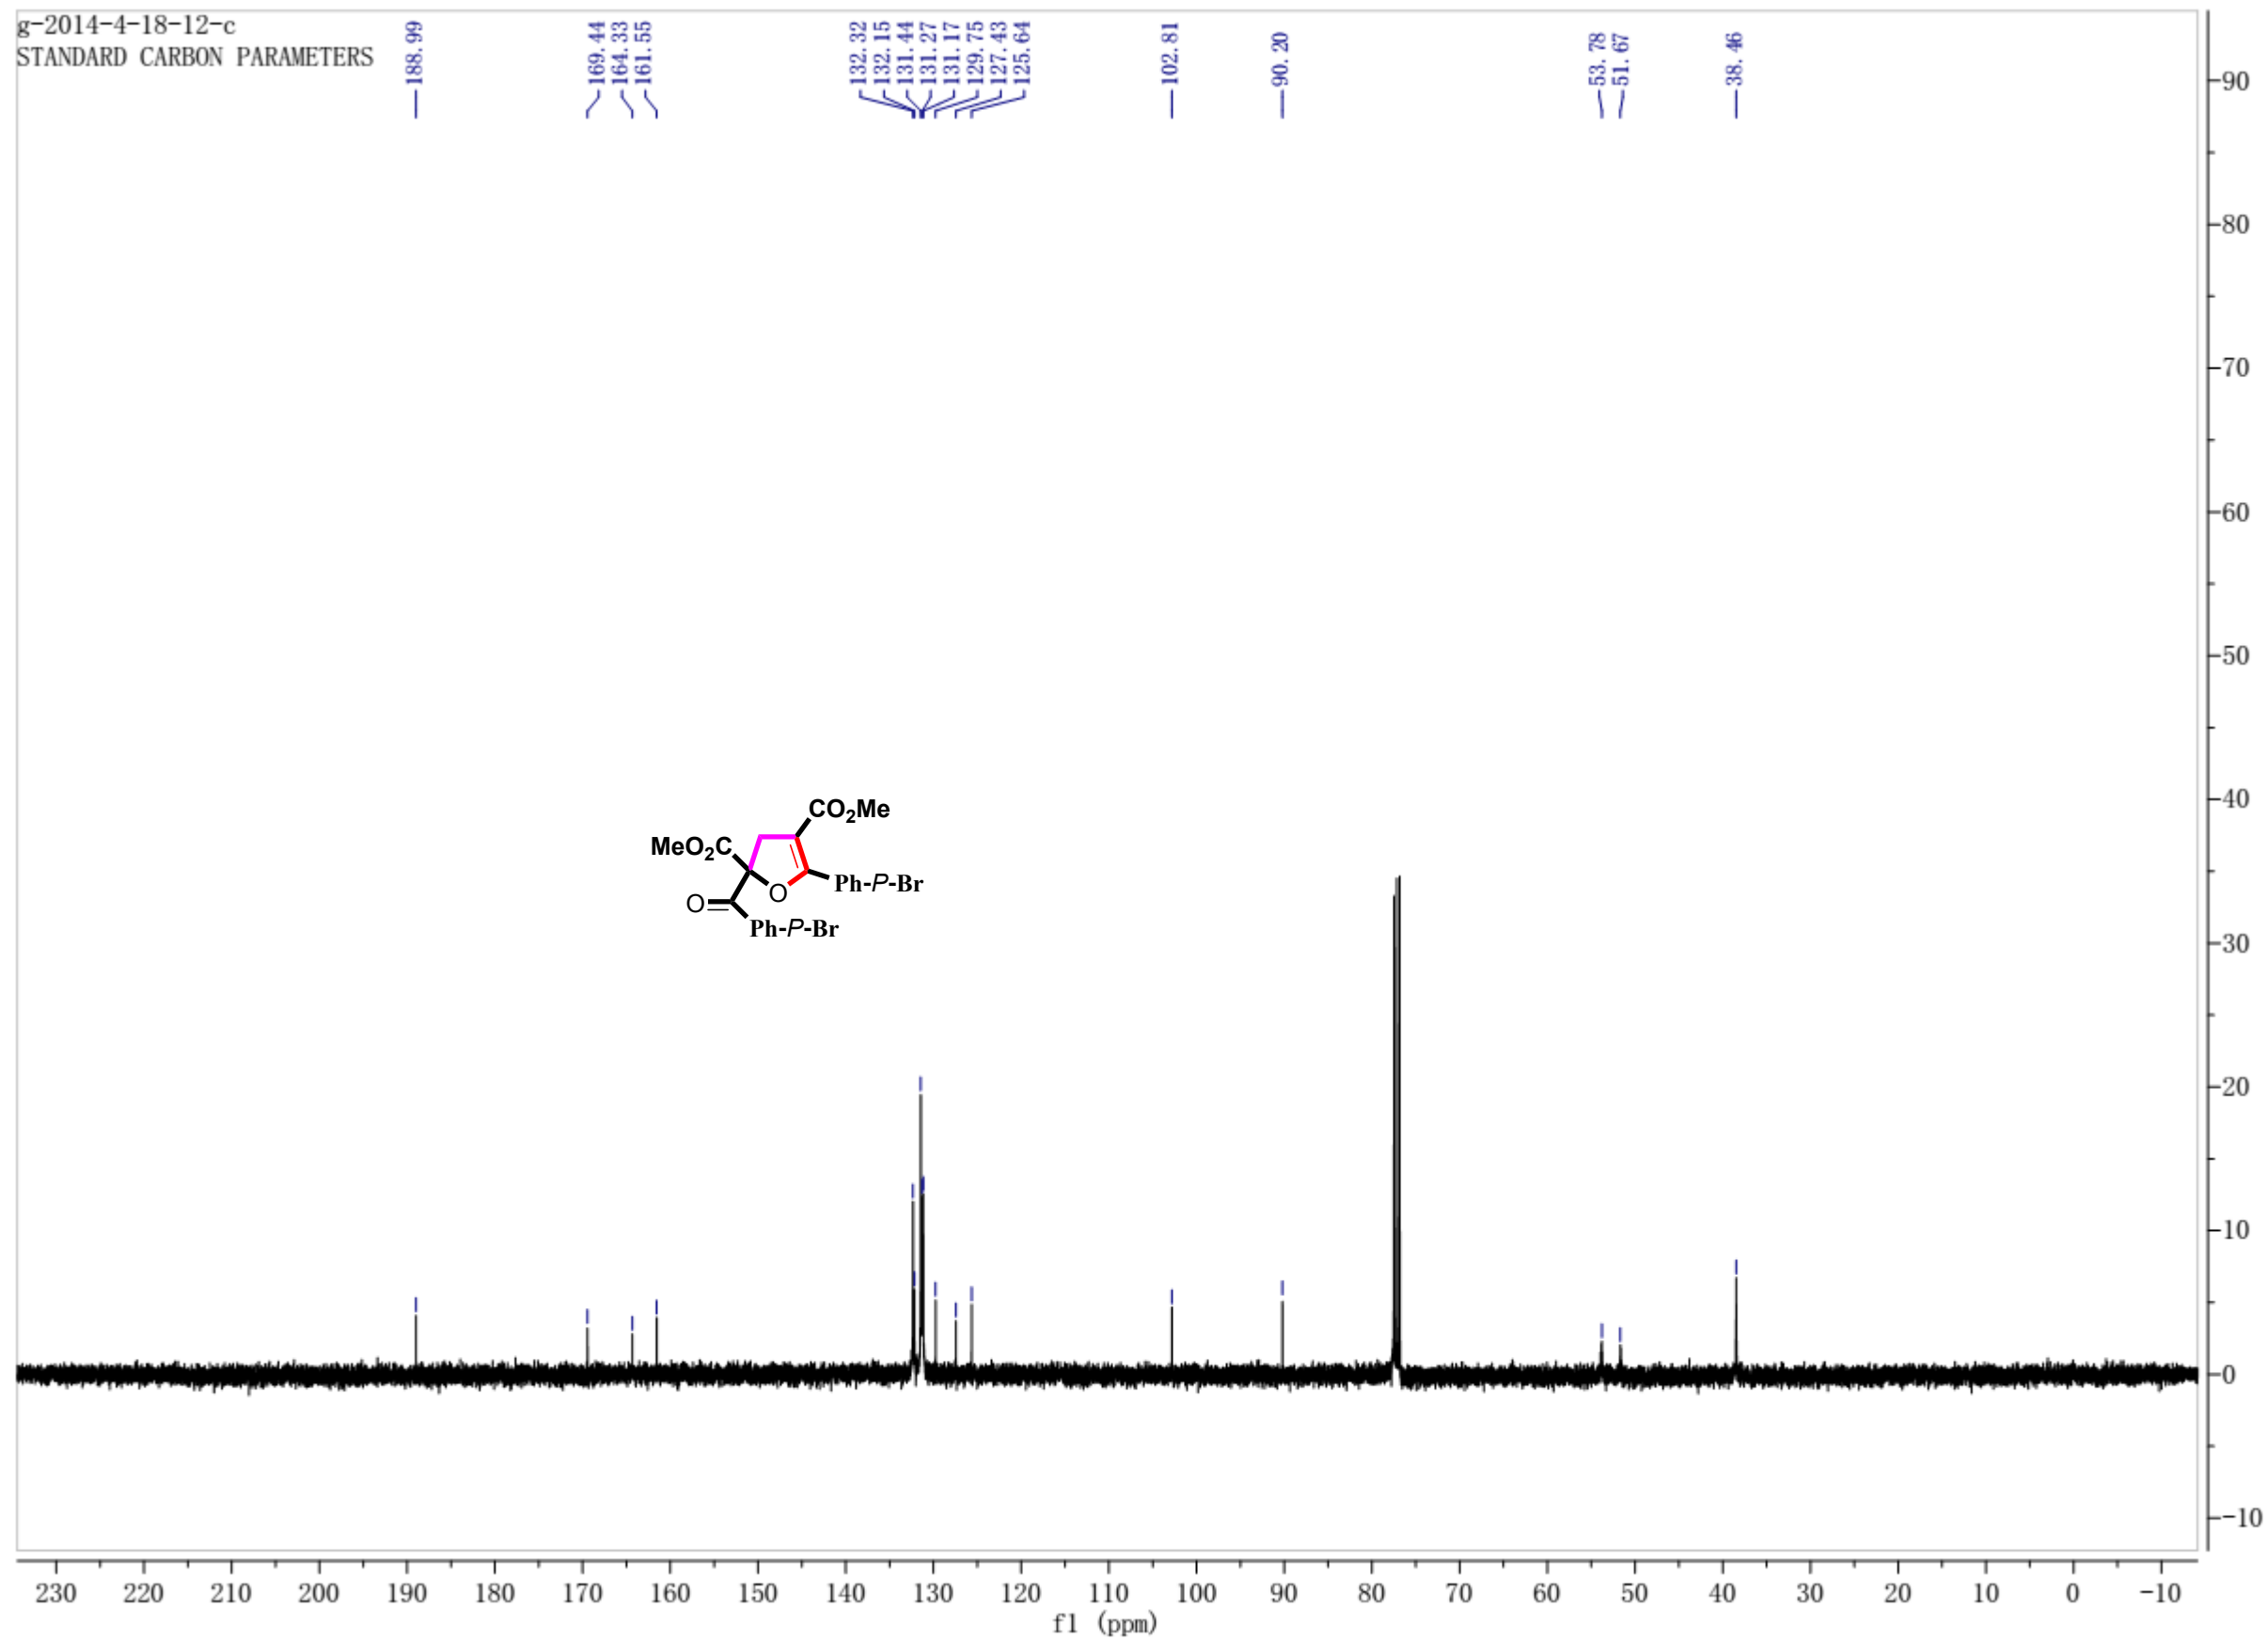

g-2014-4-18-6

STANDARD CARBON PARAMETERS

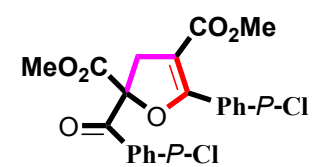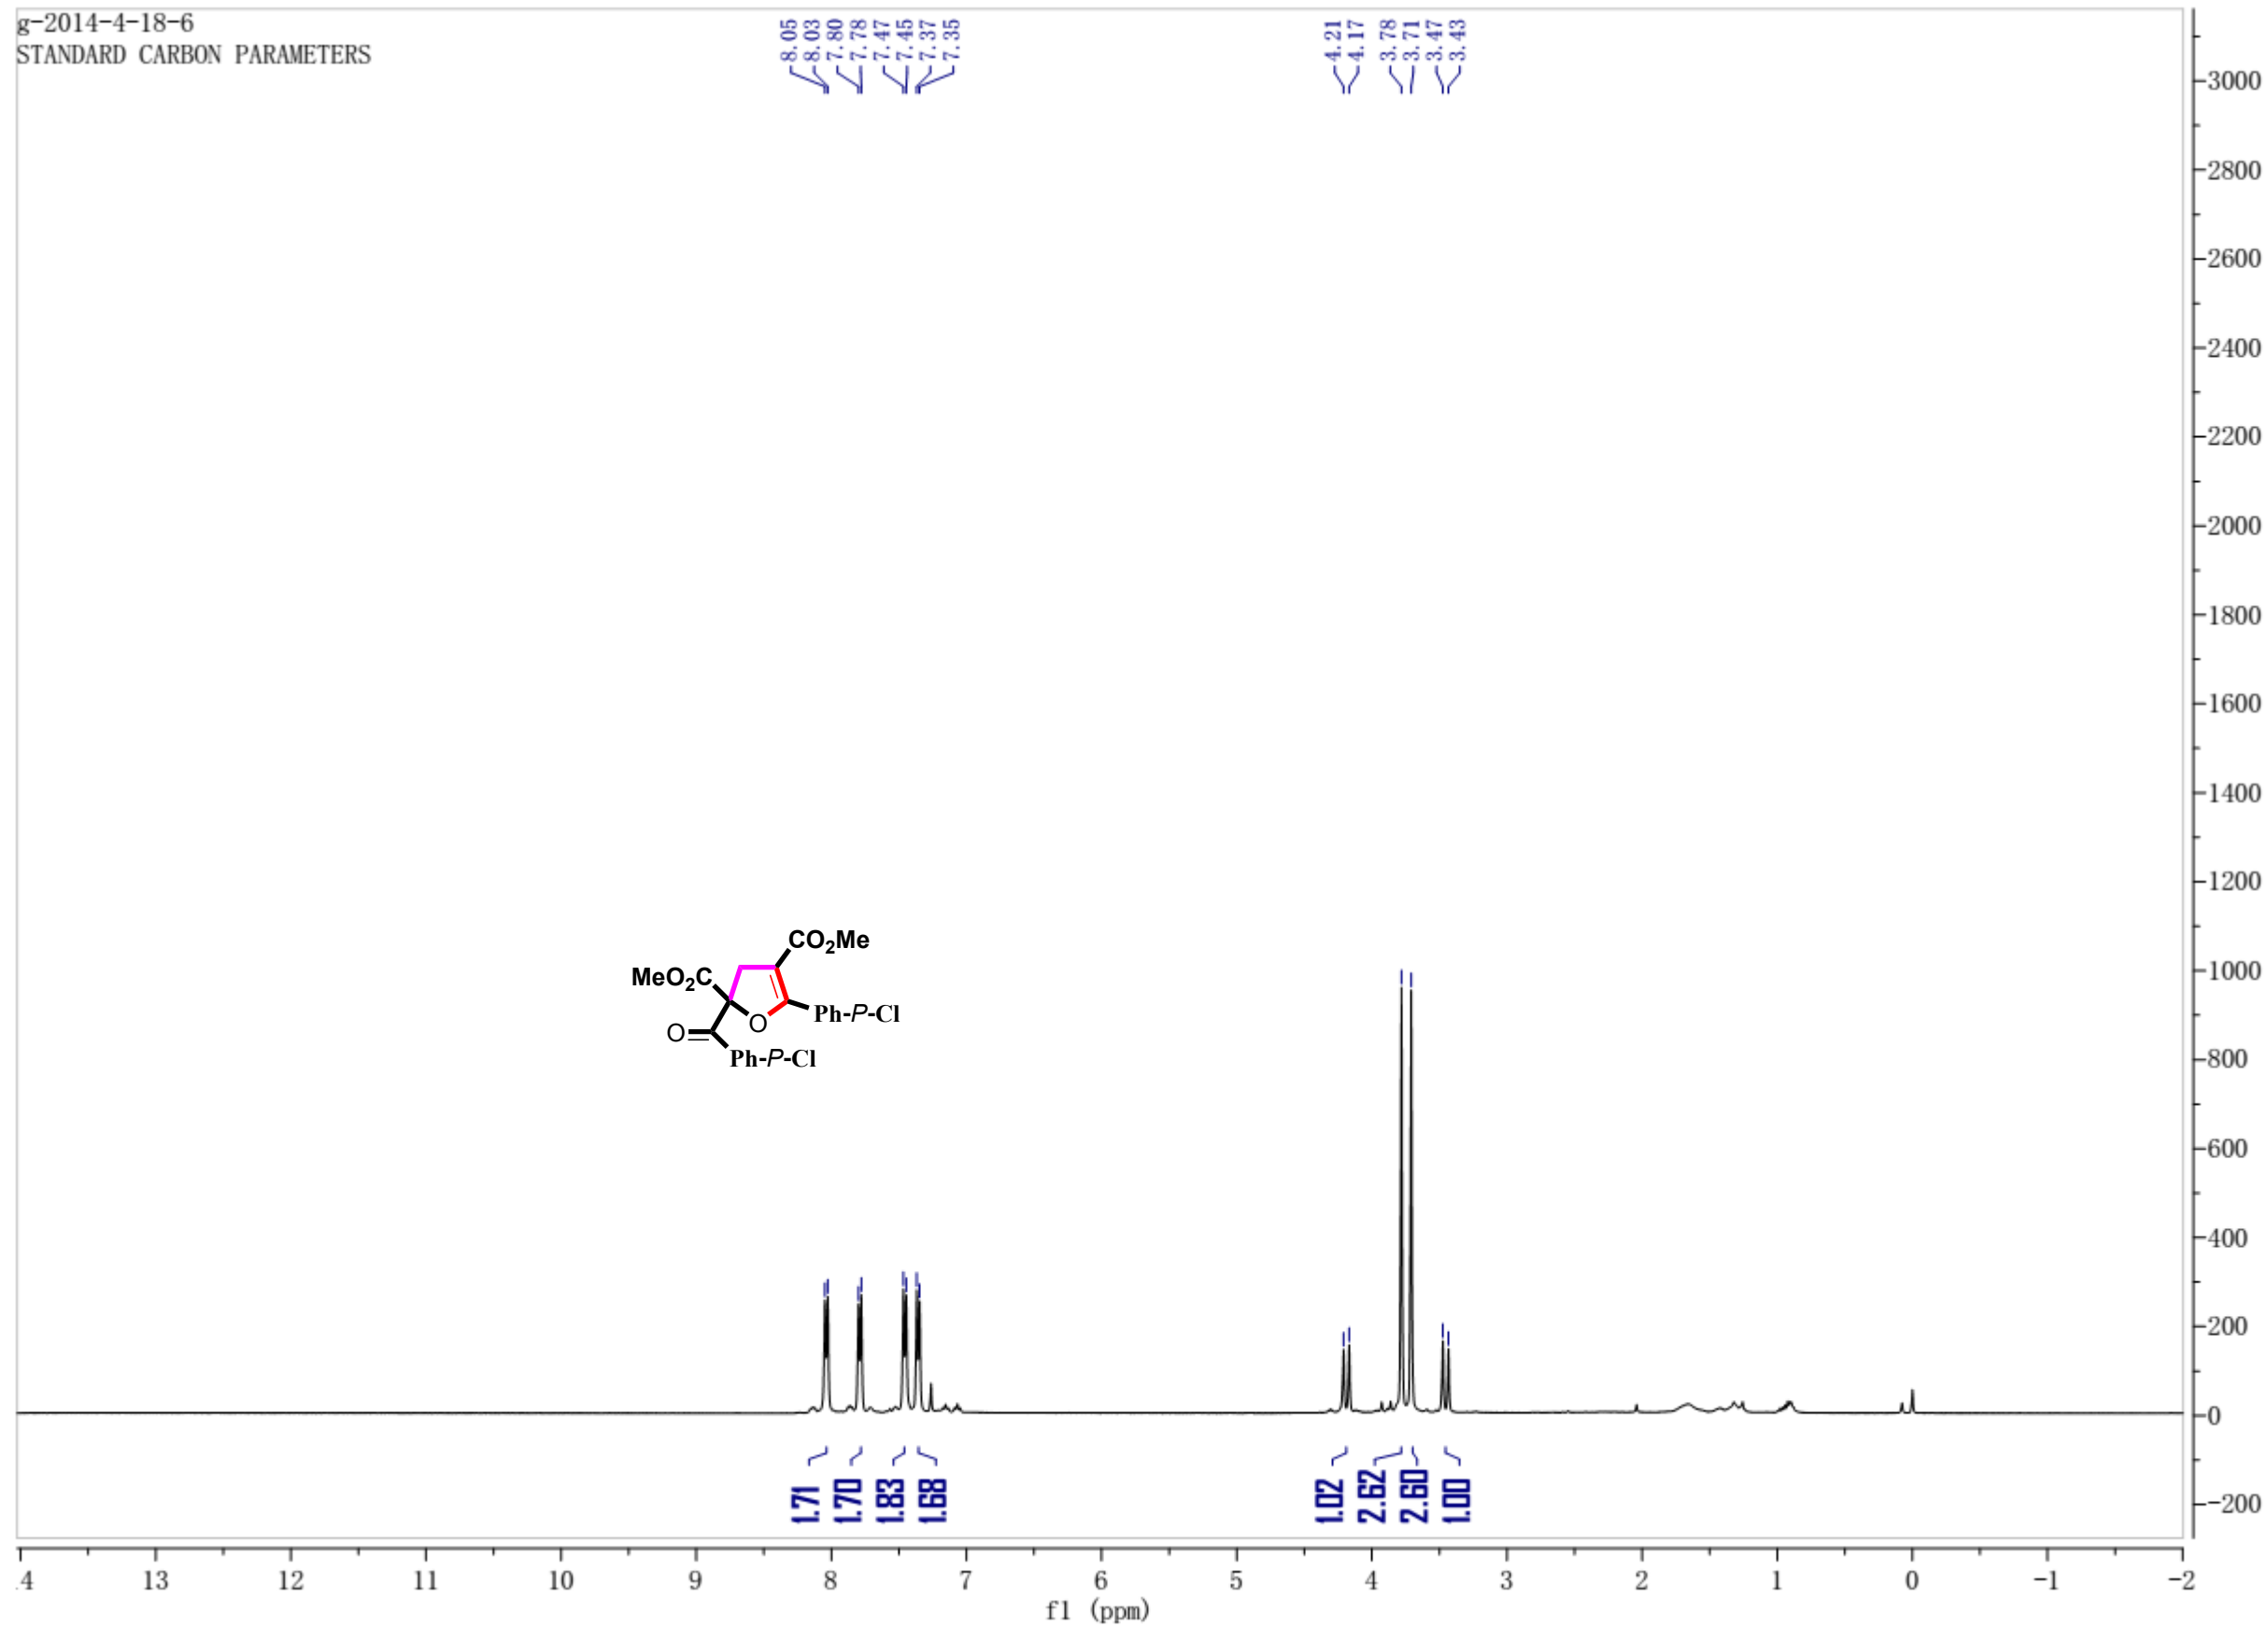

g-2014-4-18-6-c

STANDARD CARBON PARAMETERS

188.76

169.45

164.33

161.47

140.85

137.13

131.73

131.38

130.99

129.30

128.27

126.97

102.70

90.19

53.74

51.58

38.43

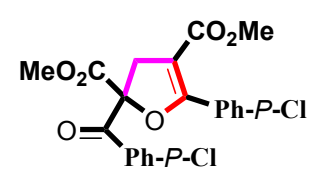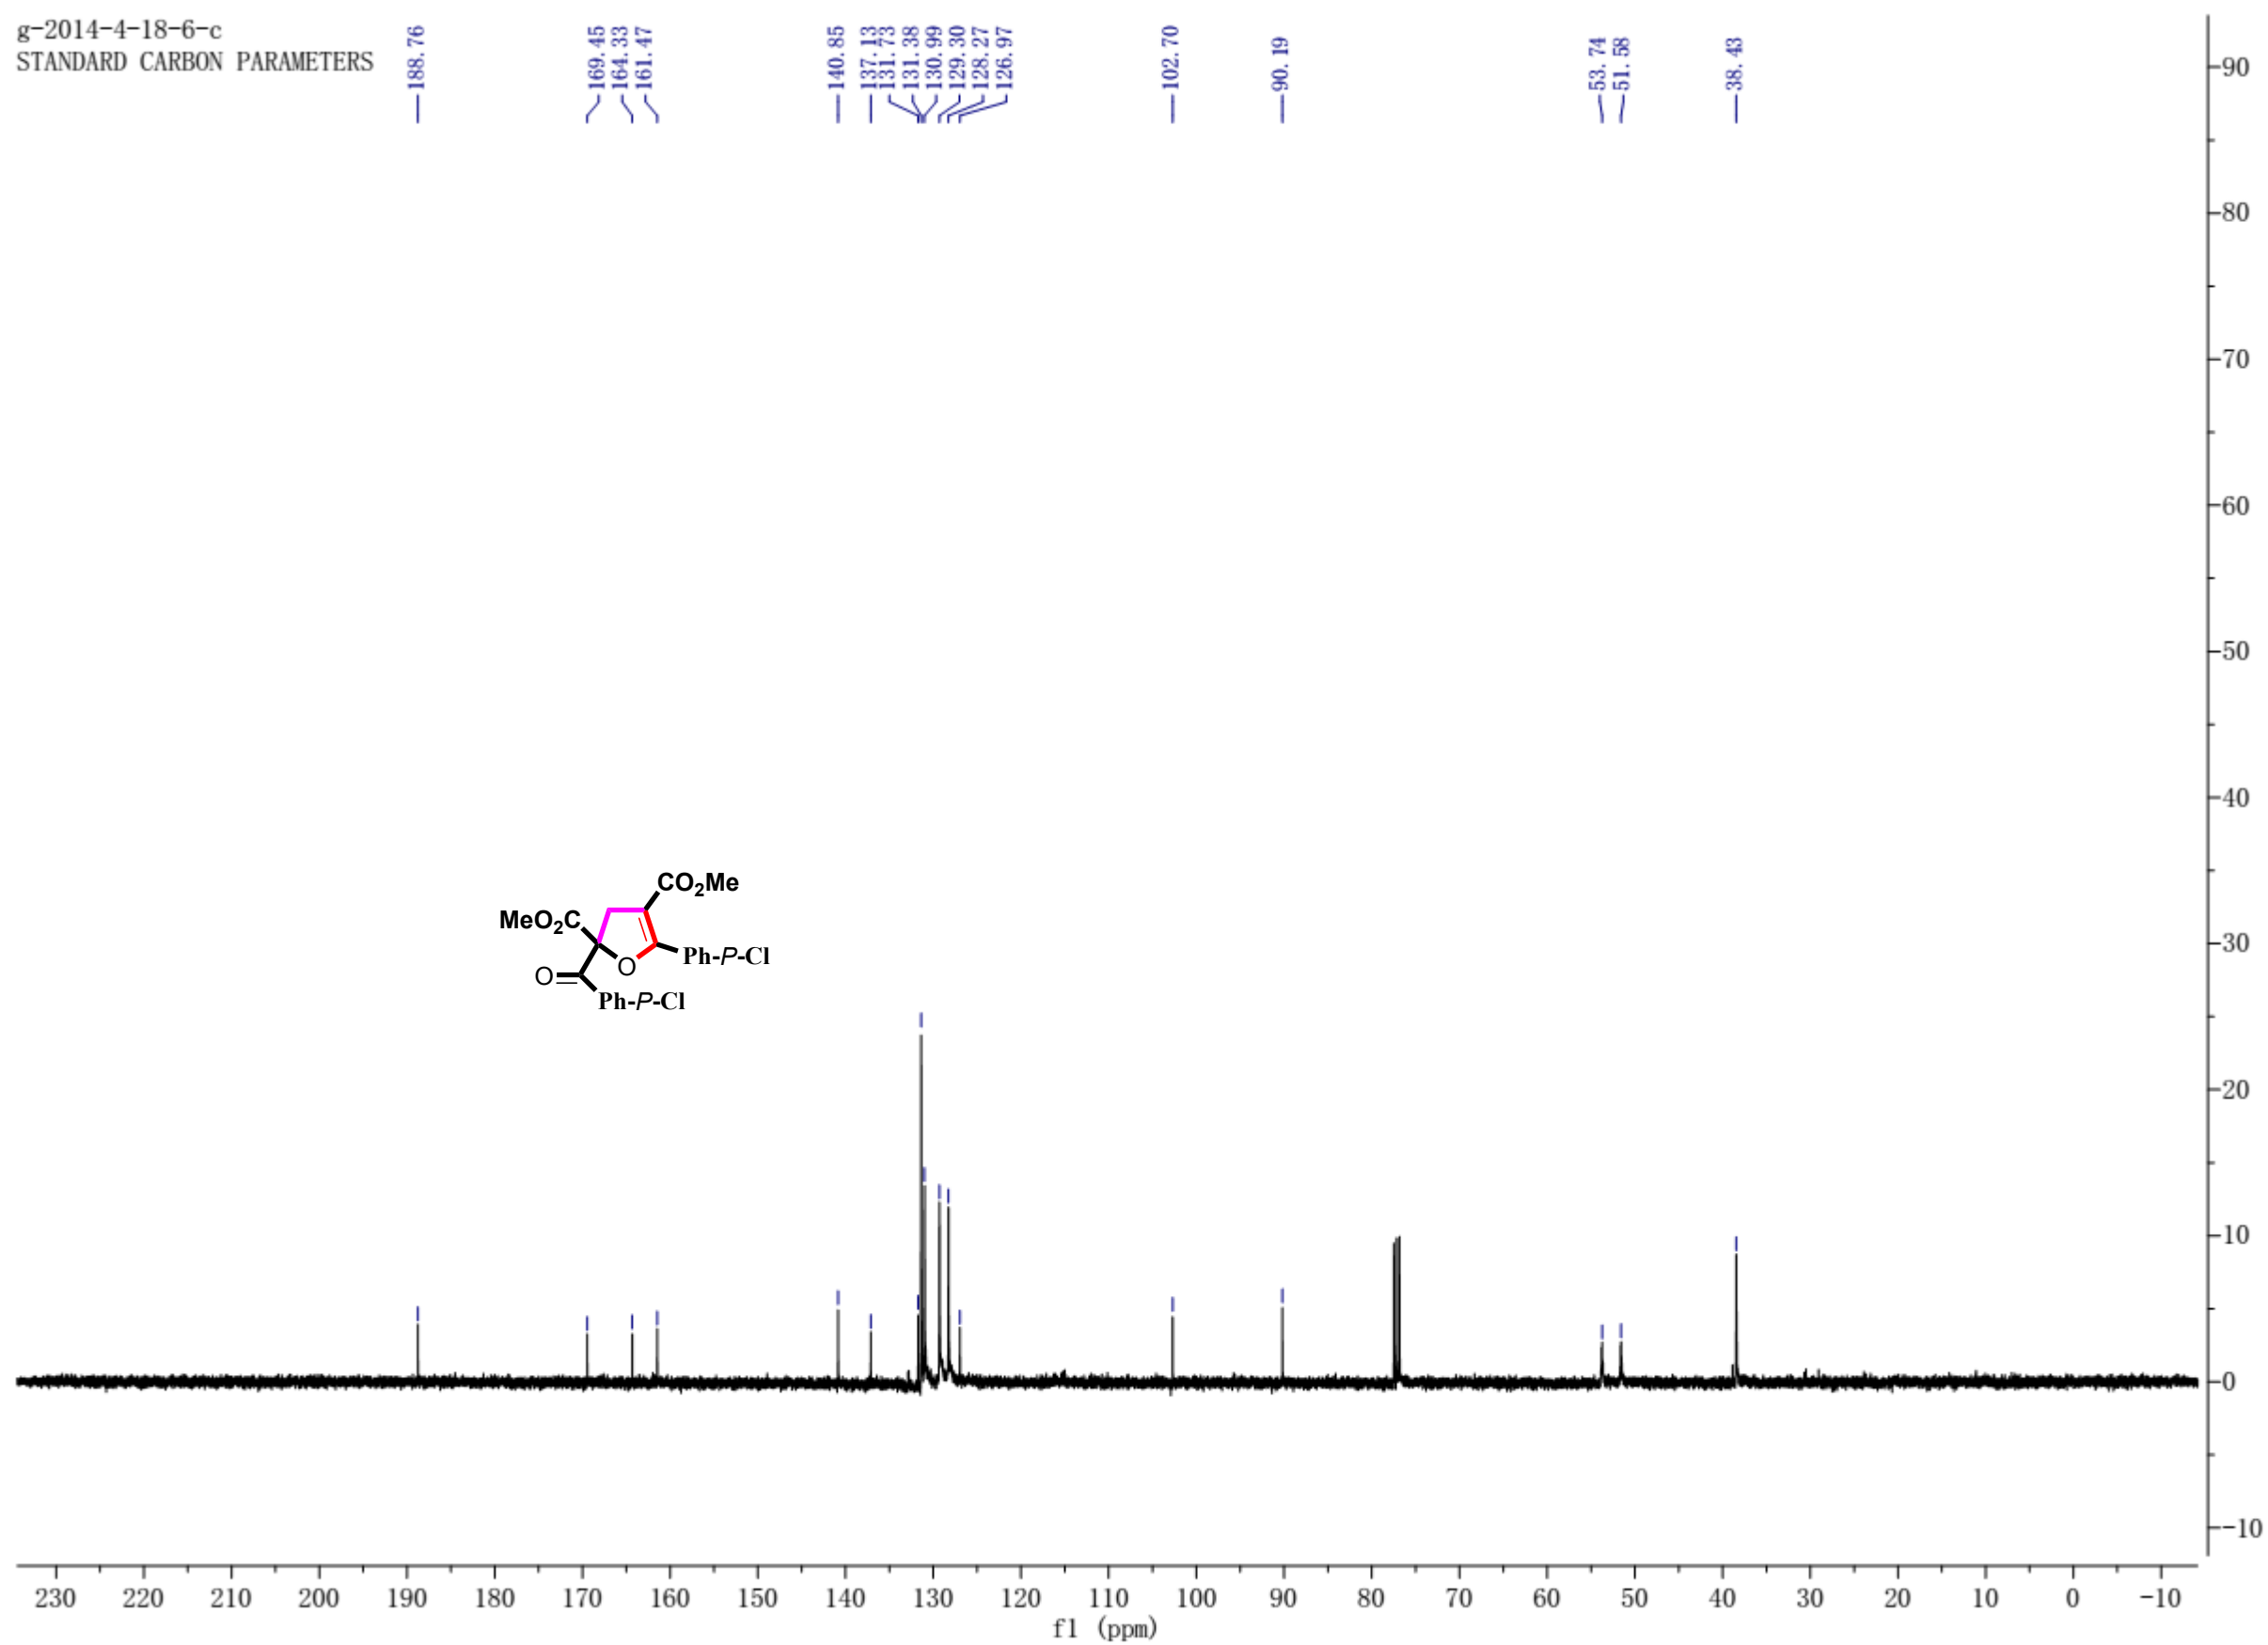



g-2014-4-18-3  
STANDARD CARBON PARAMETERS

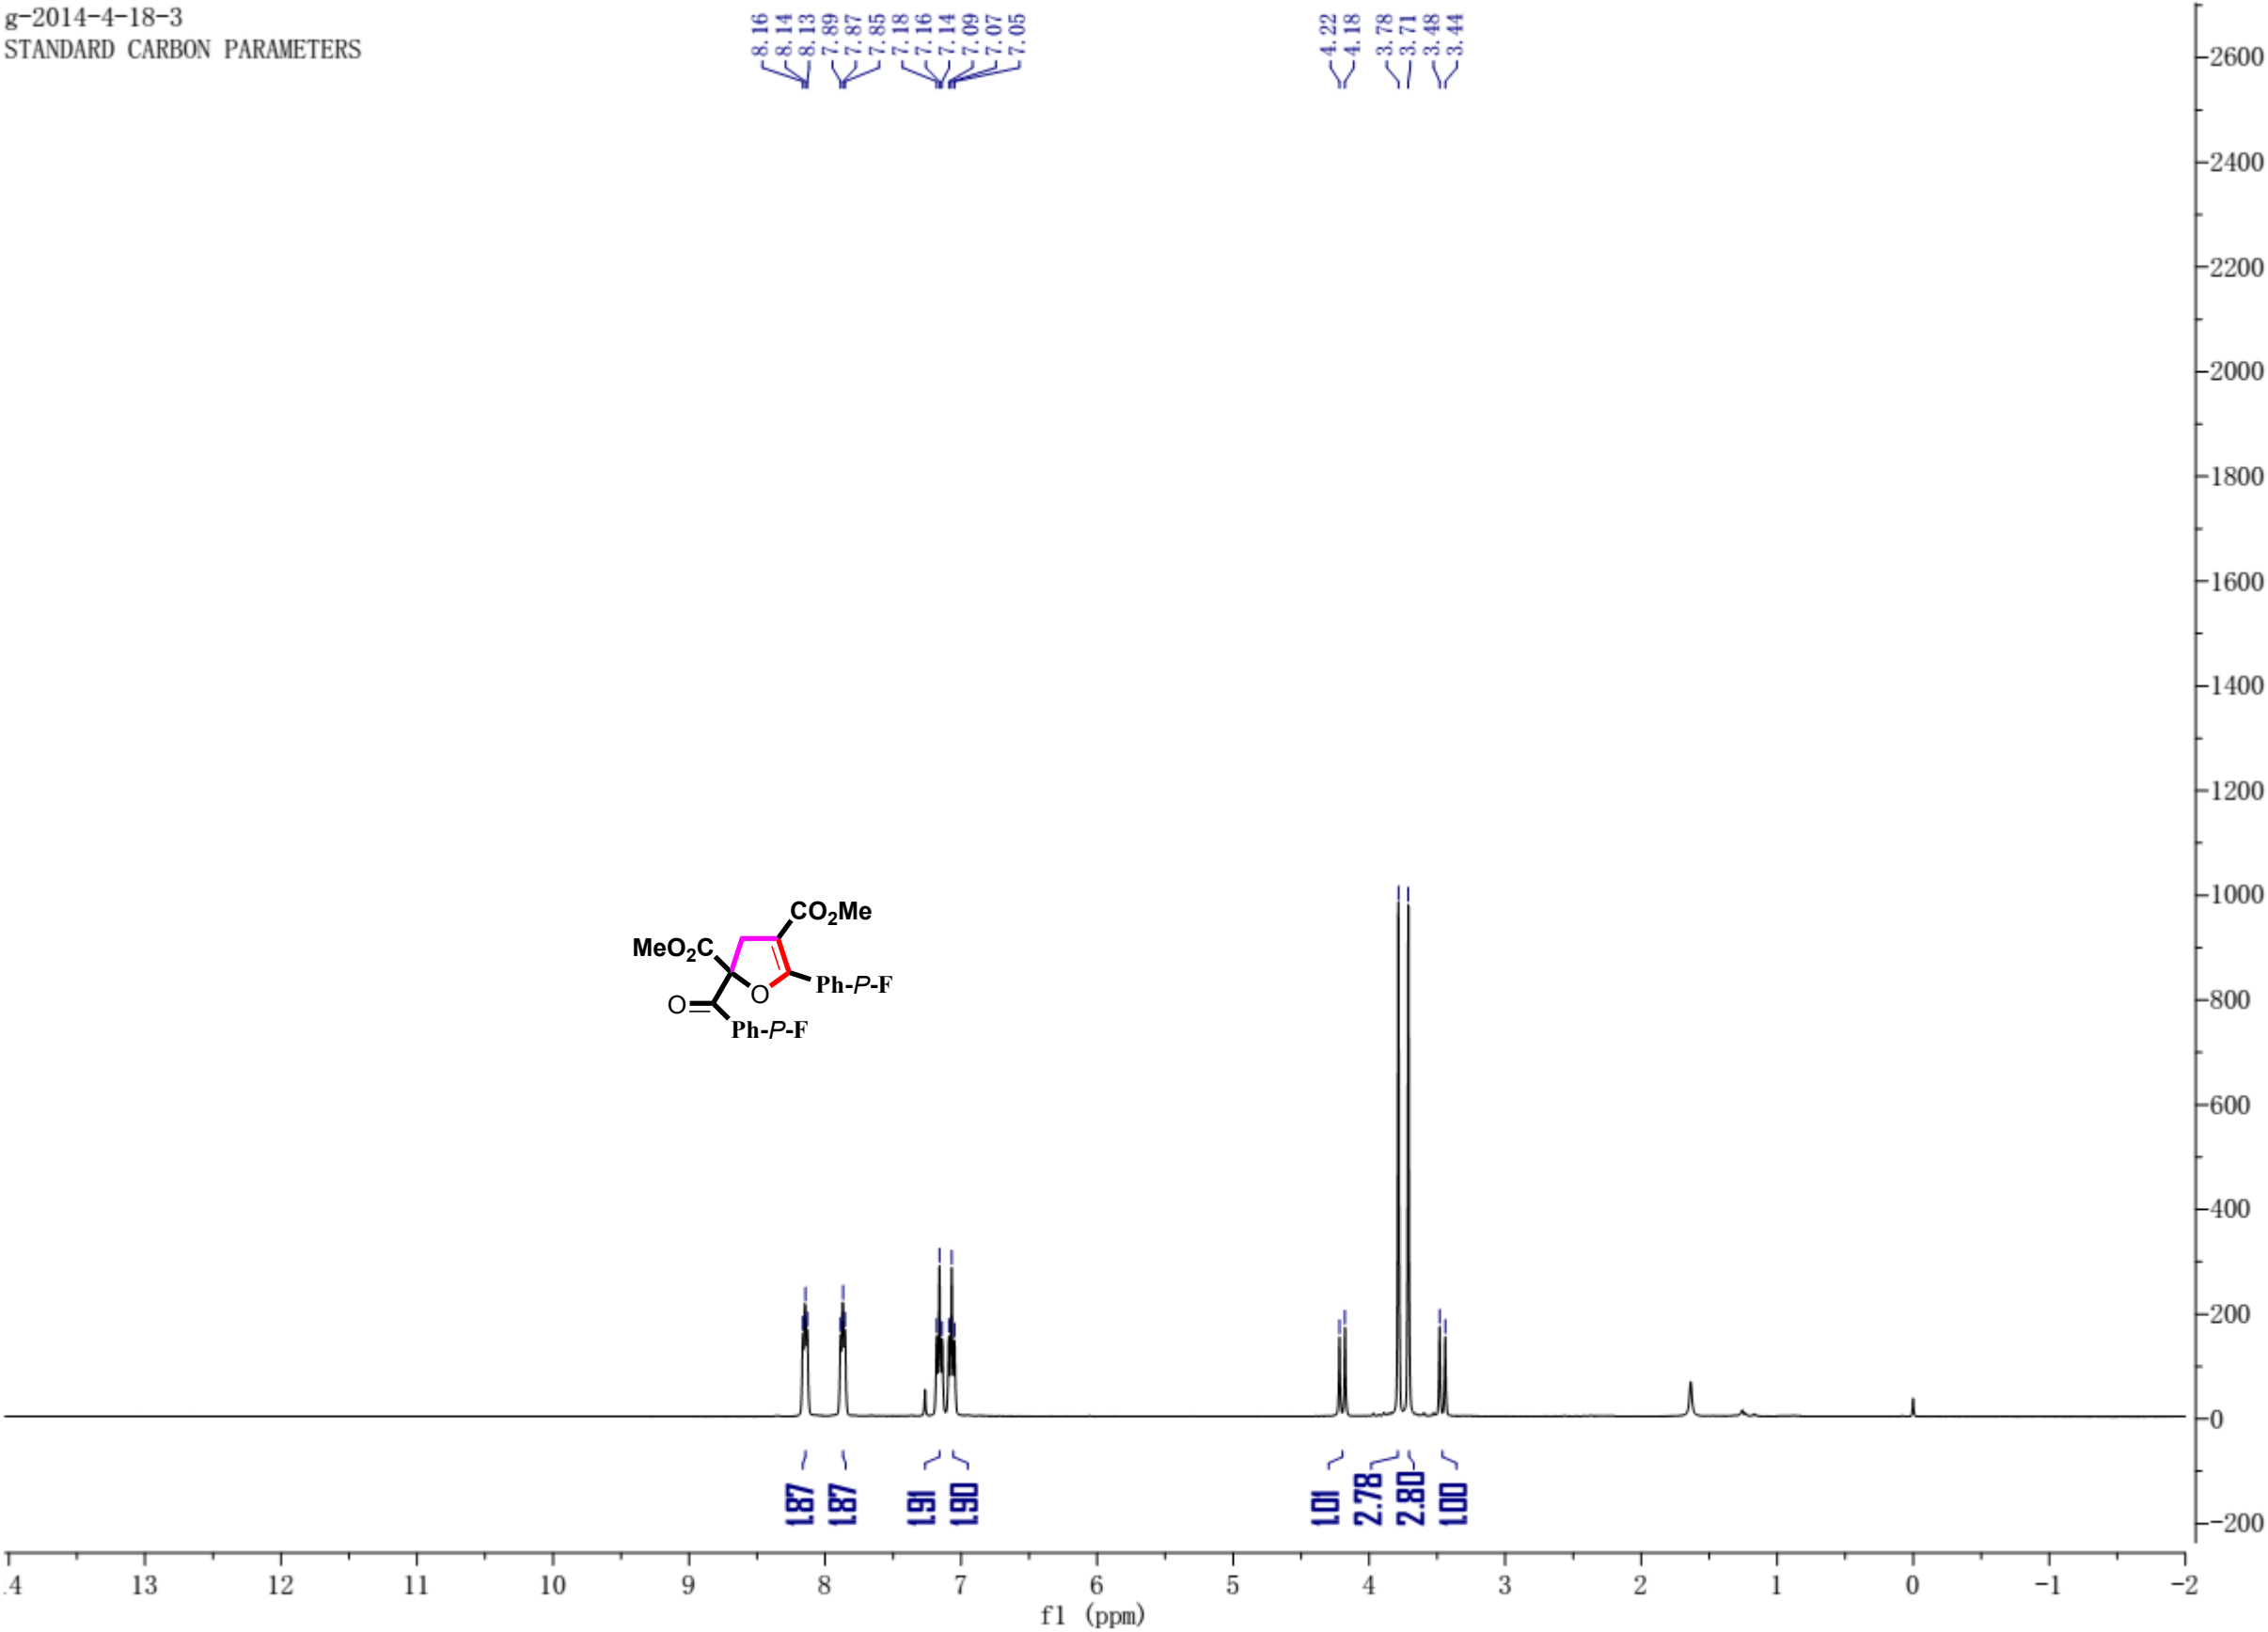

g-2014-4-18-3-c

STANDARD CARBON PARAMETERS

188.40

169.60

167.58

165.47

165.02

164.47

162.97

161.69

132.88

131.99

129.85

124.69

116.07

114.99

102.08

90.20

53.69

51.52

38.41

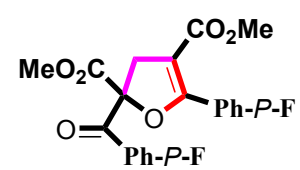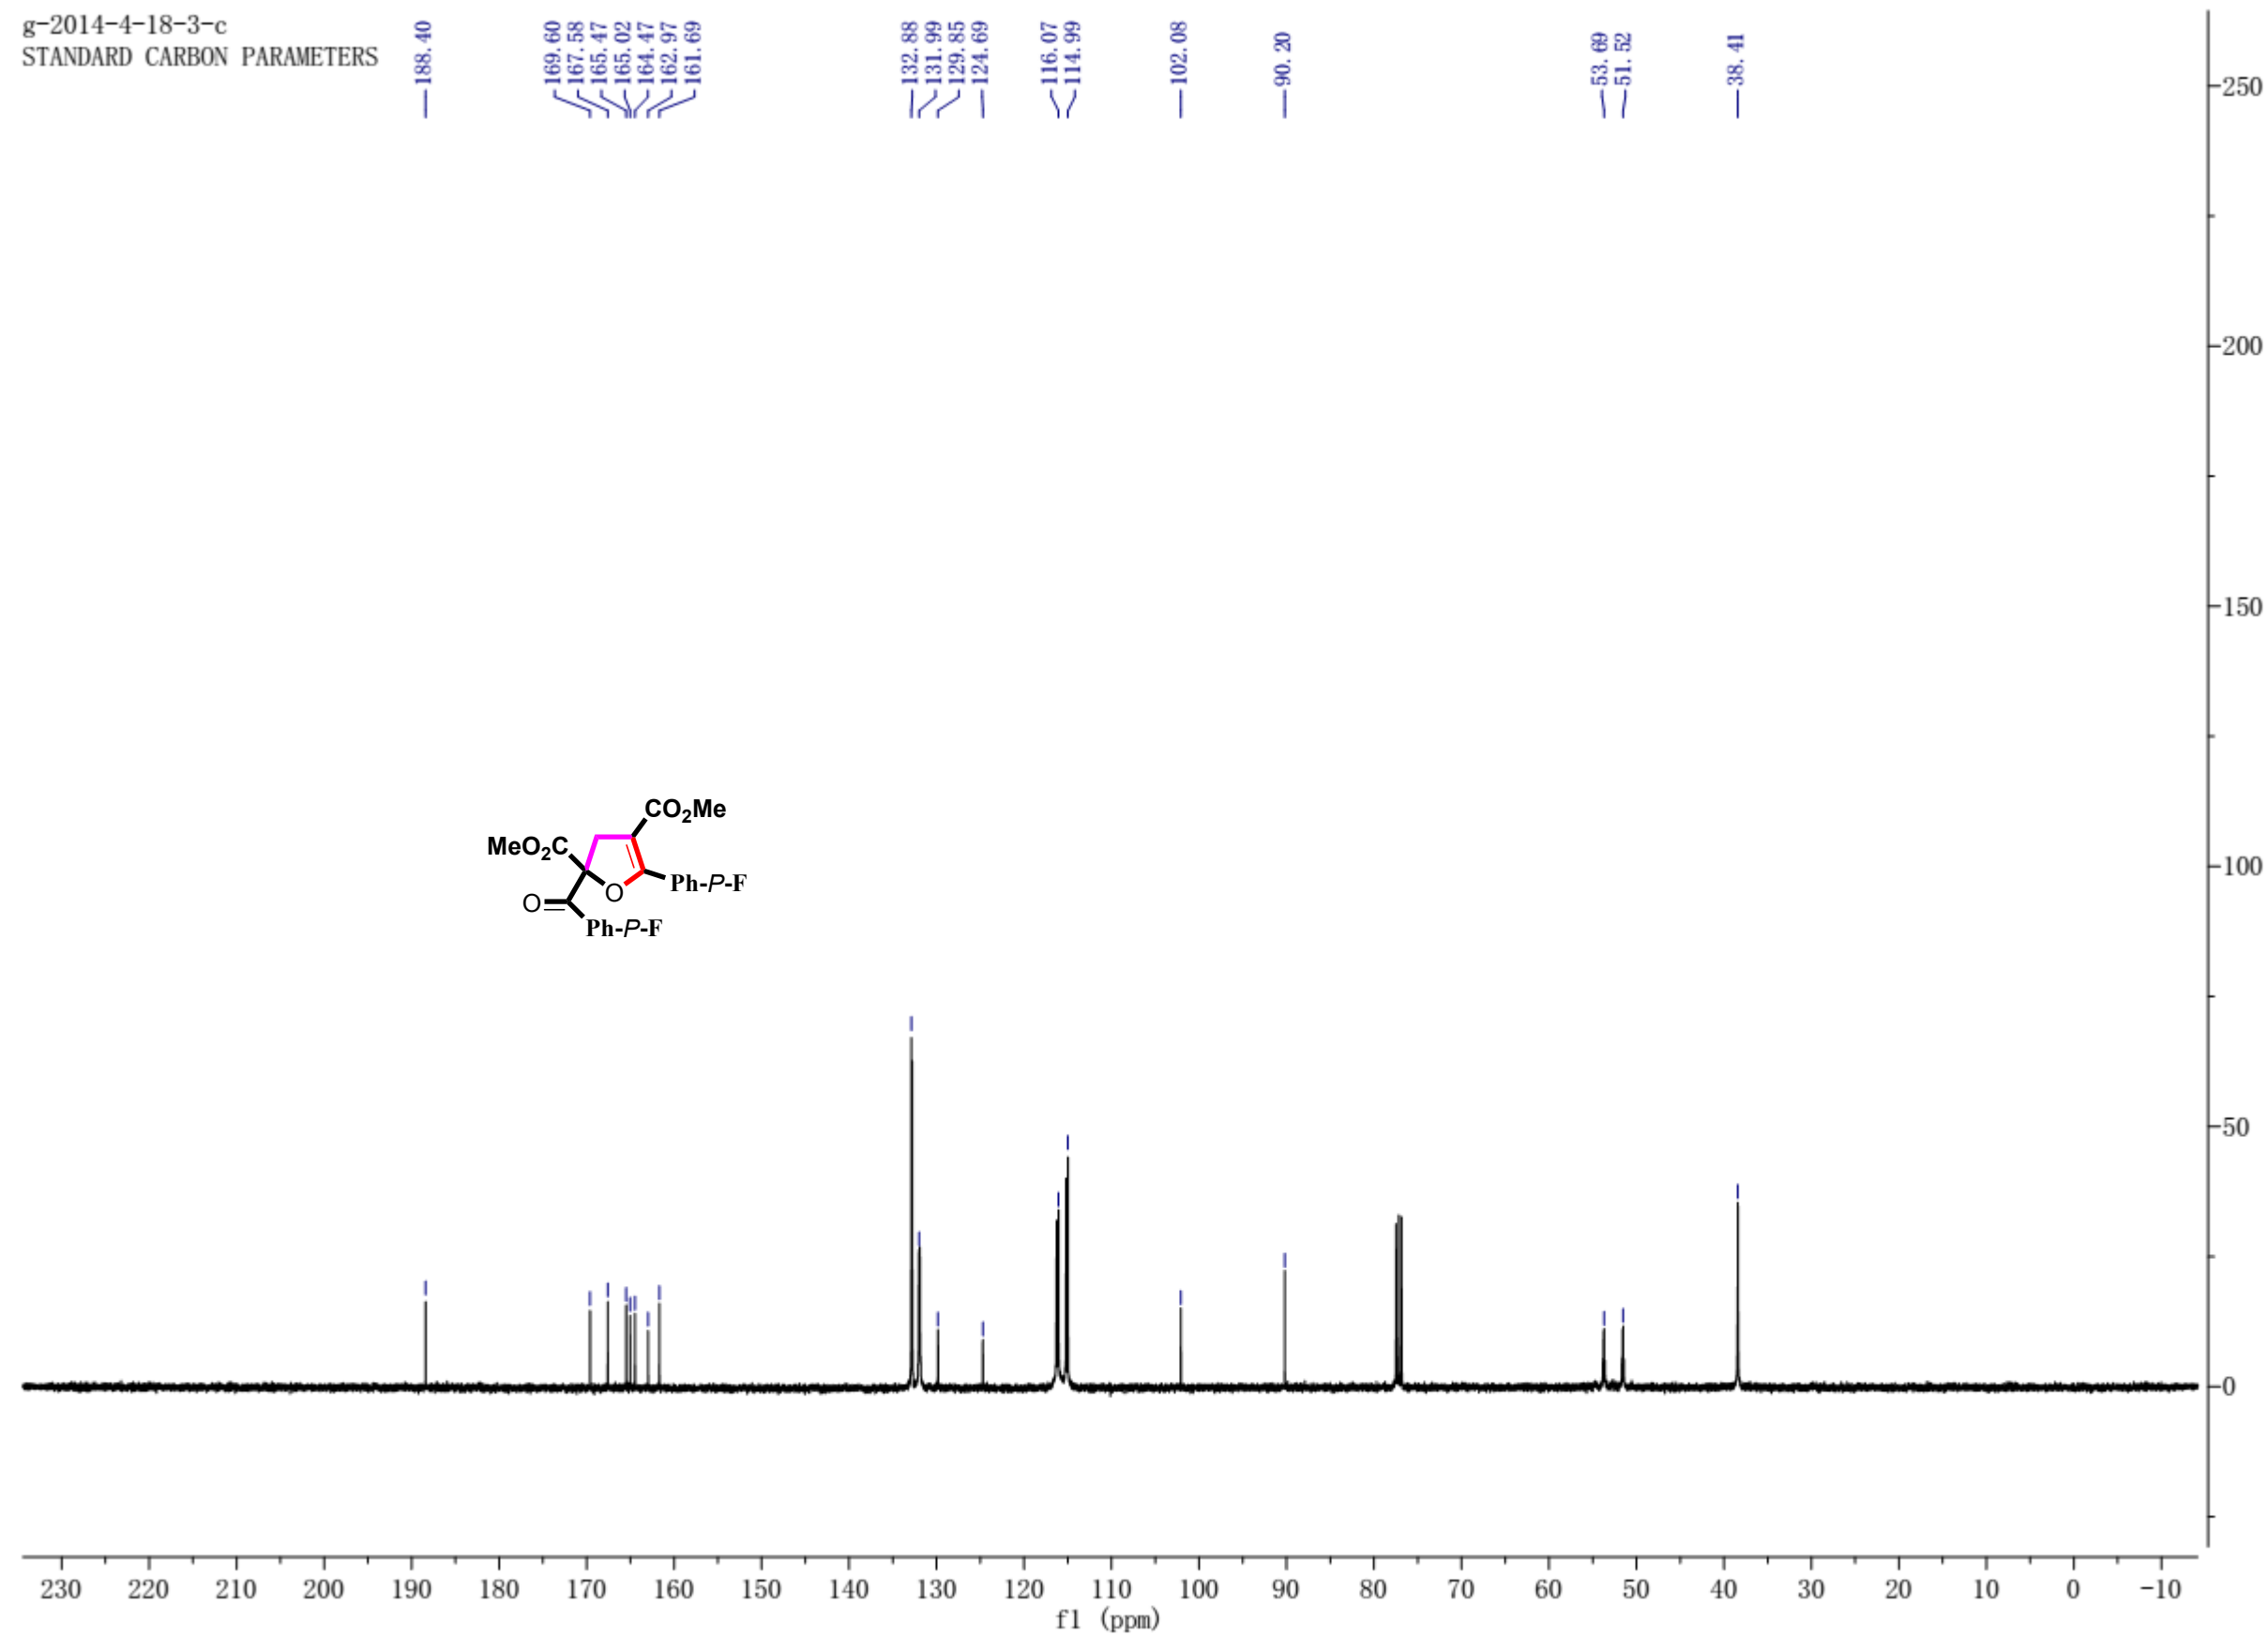

g-2014-4-18-14  
STANDARD CARBON PARAMETERS

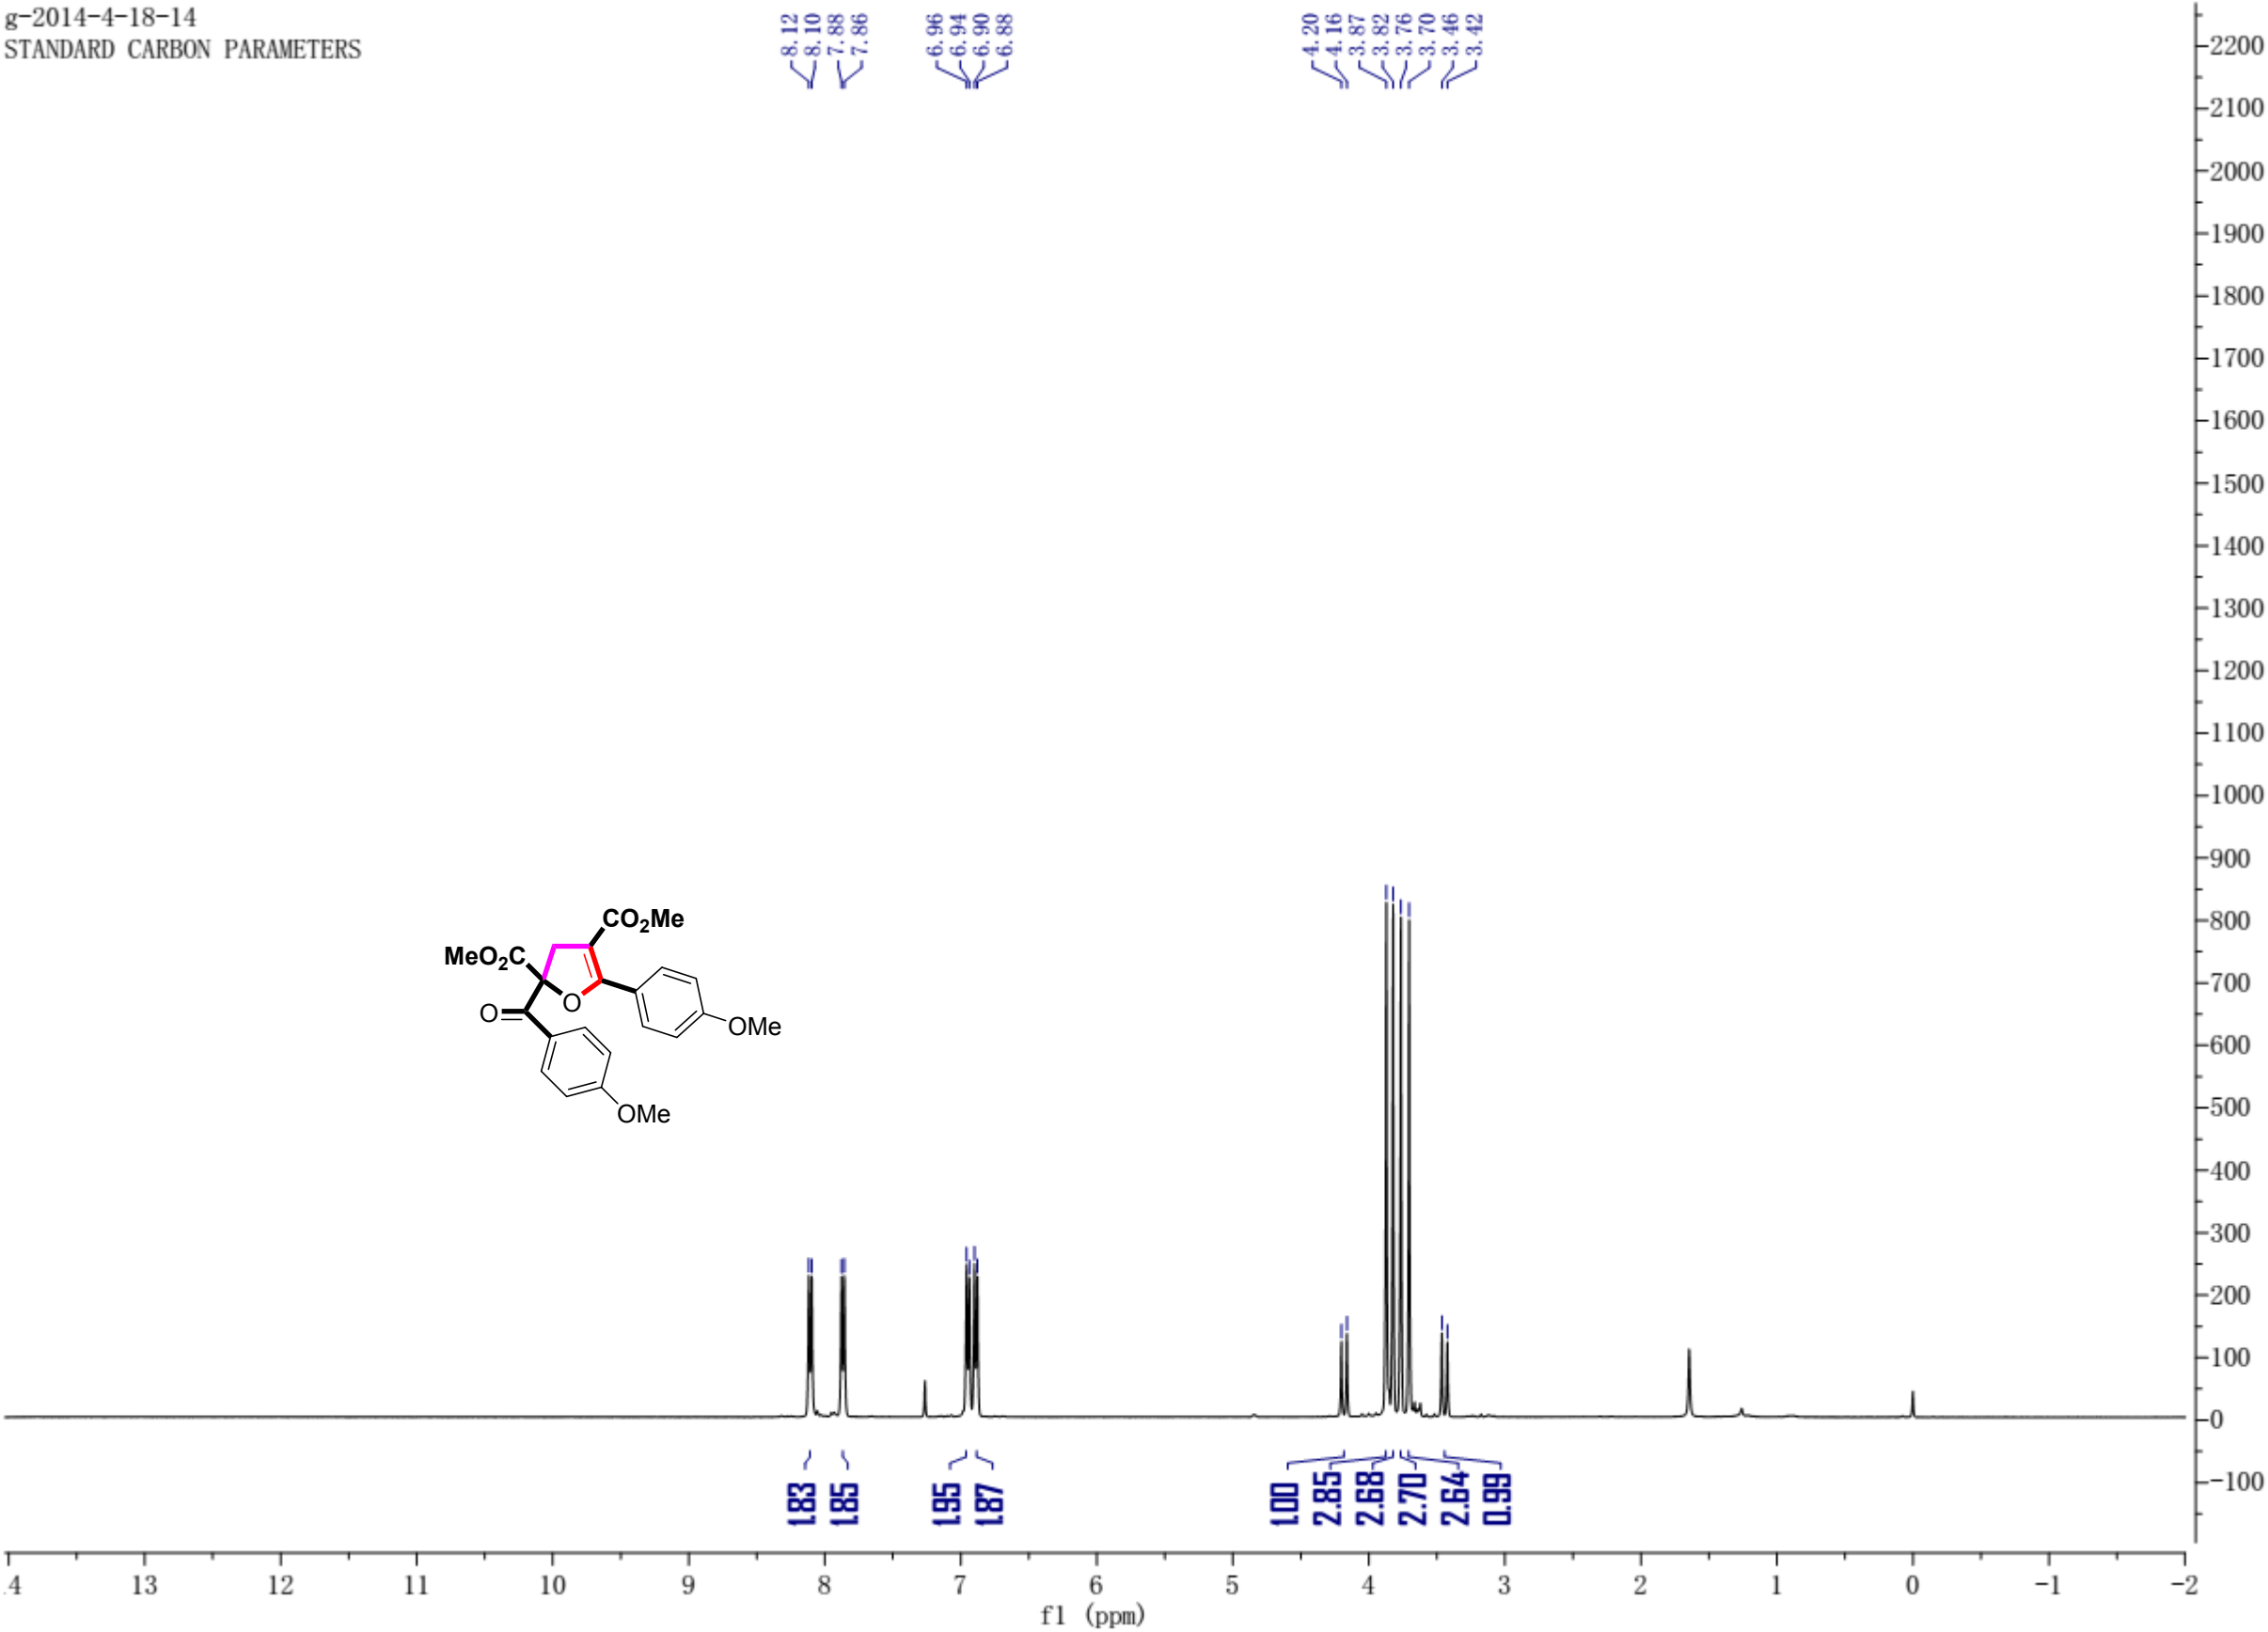

g-2014-4-18-14-c

STANDARD CARBON PARAMETERS

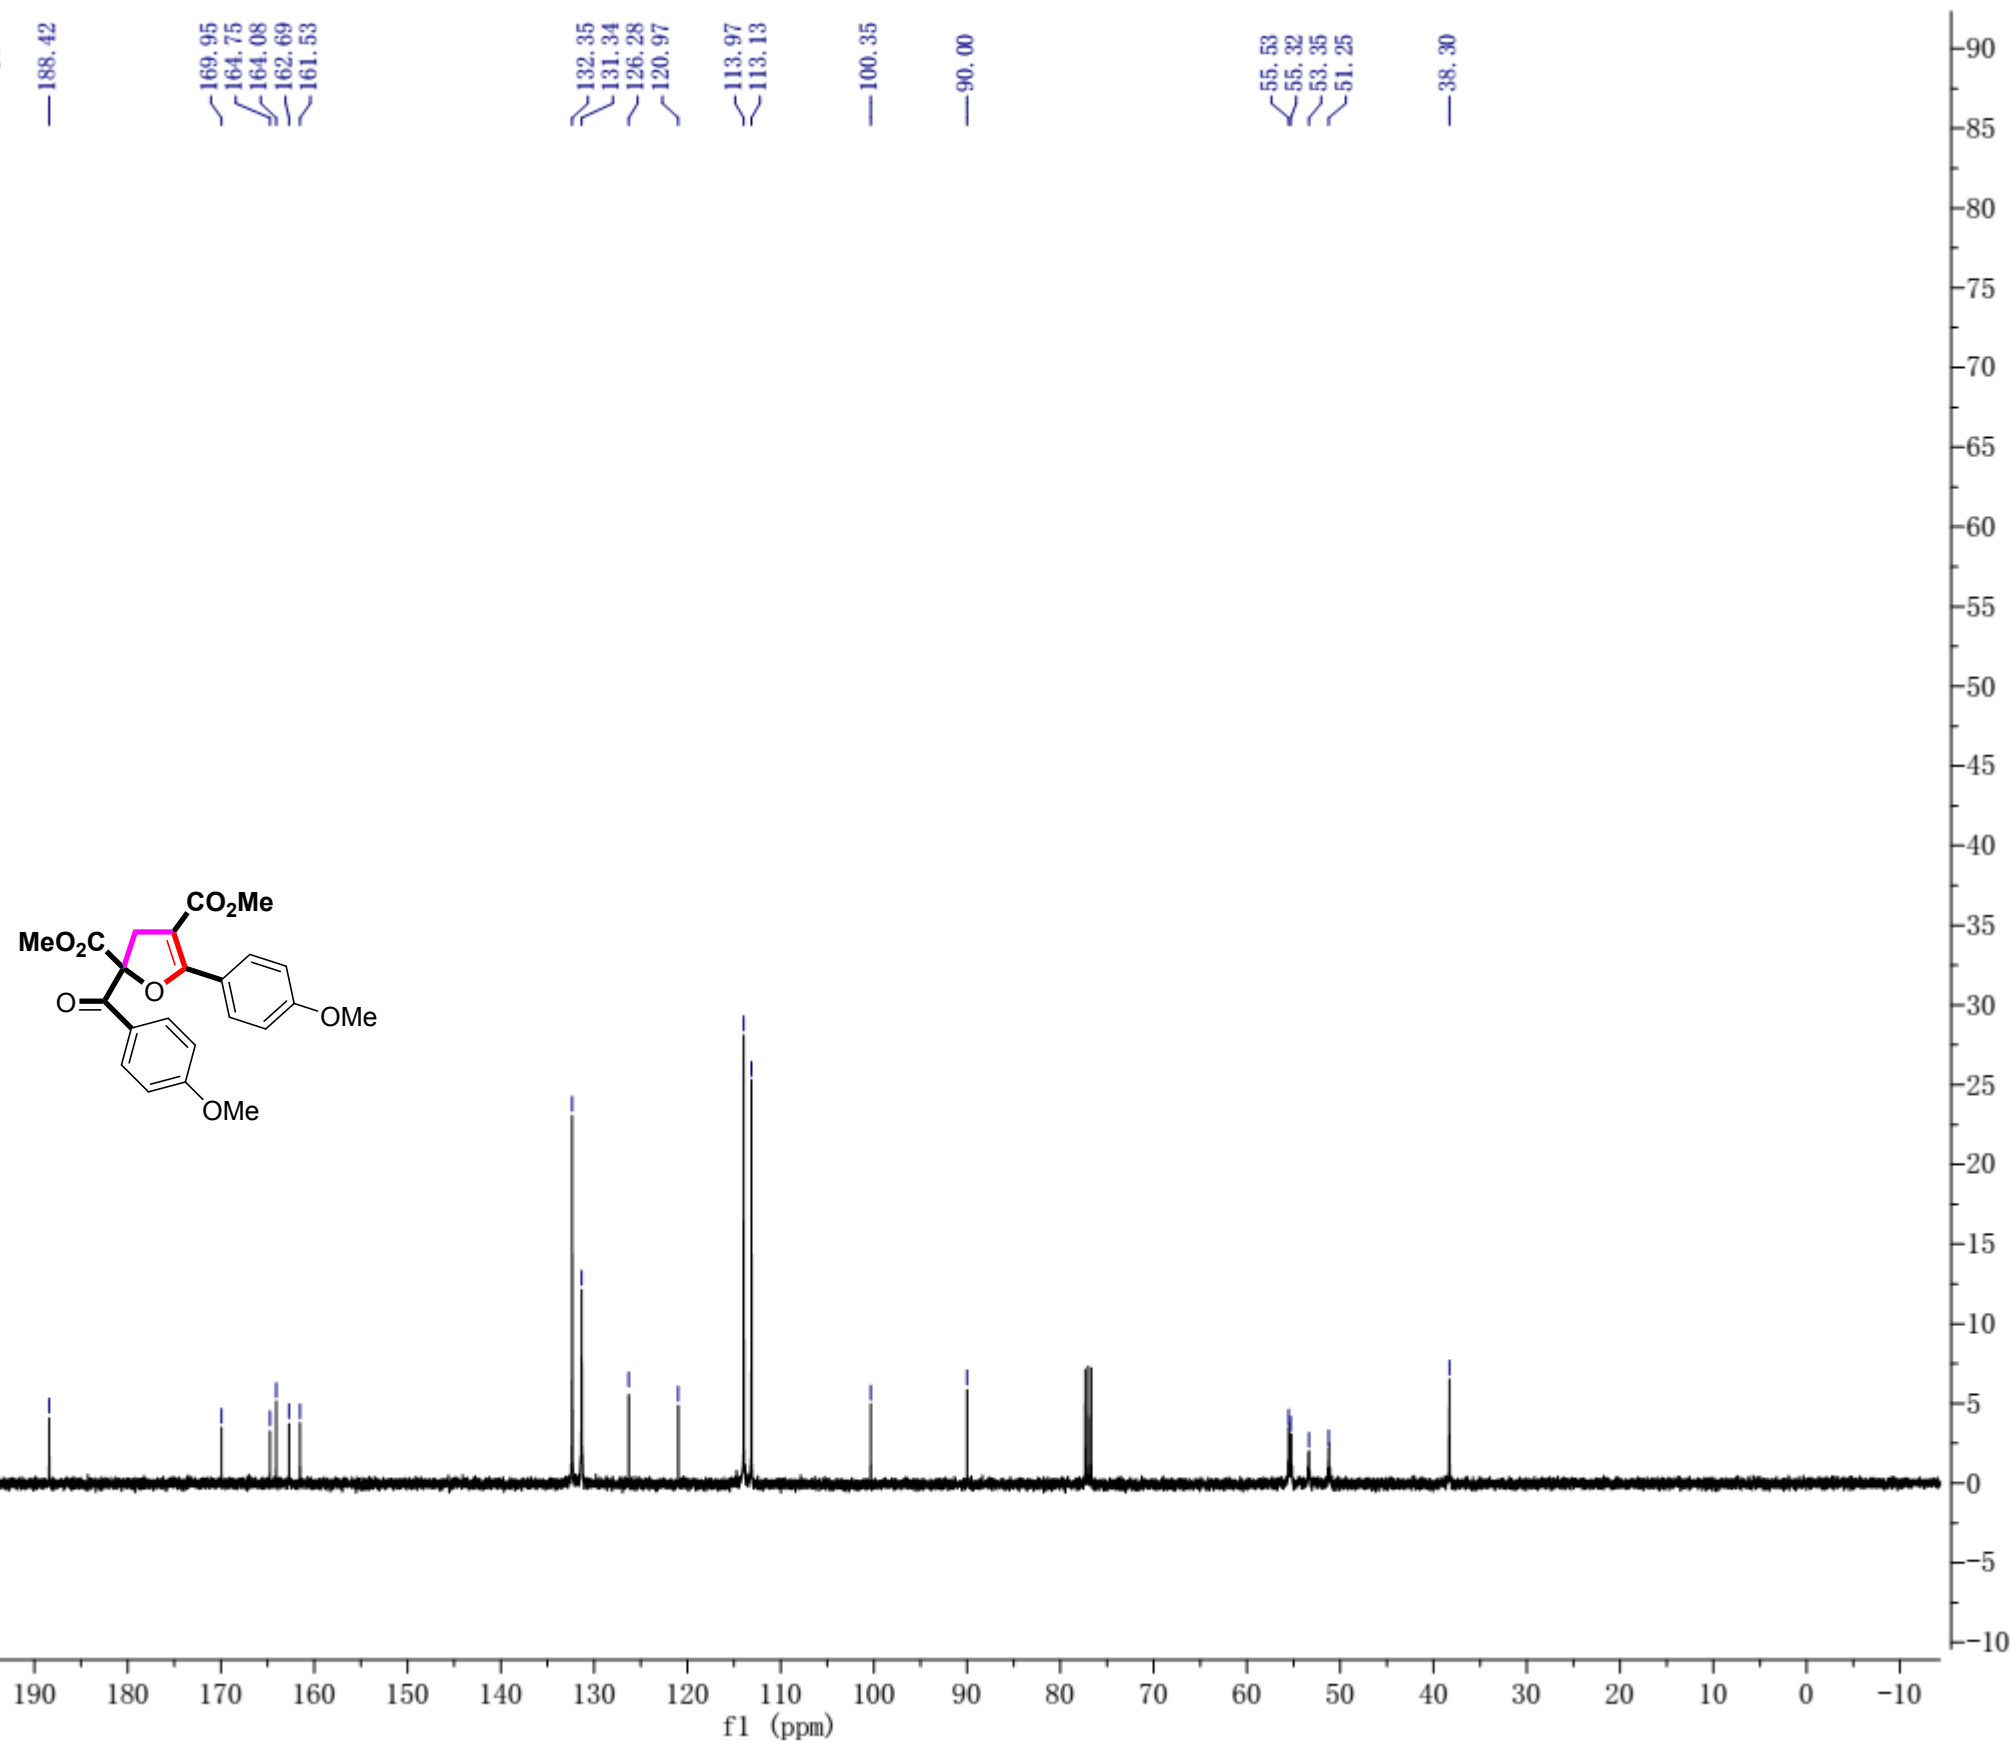

g-2014-4-26-3  
STANDARD CARBON PARAMETERS

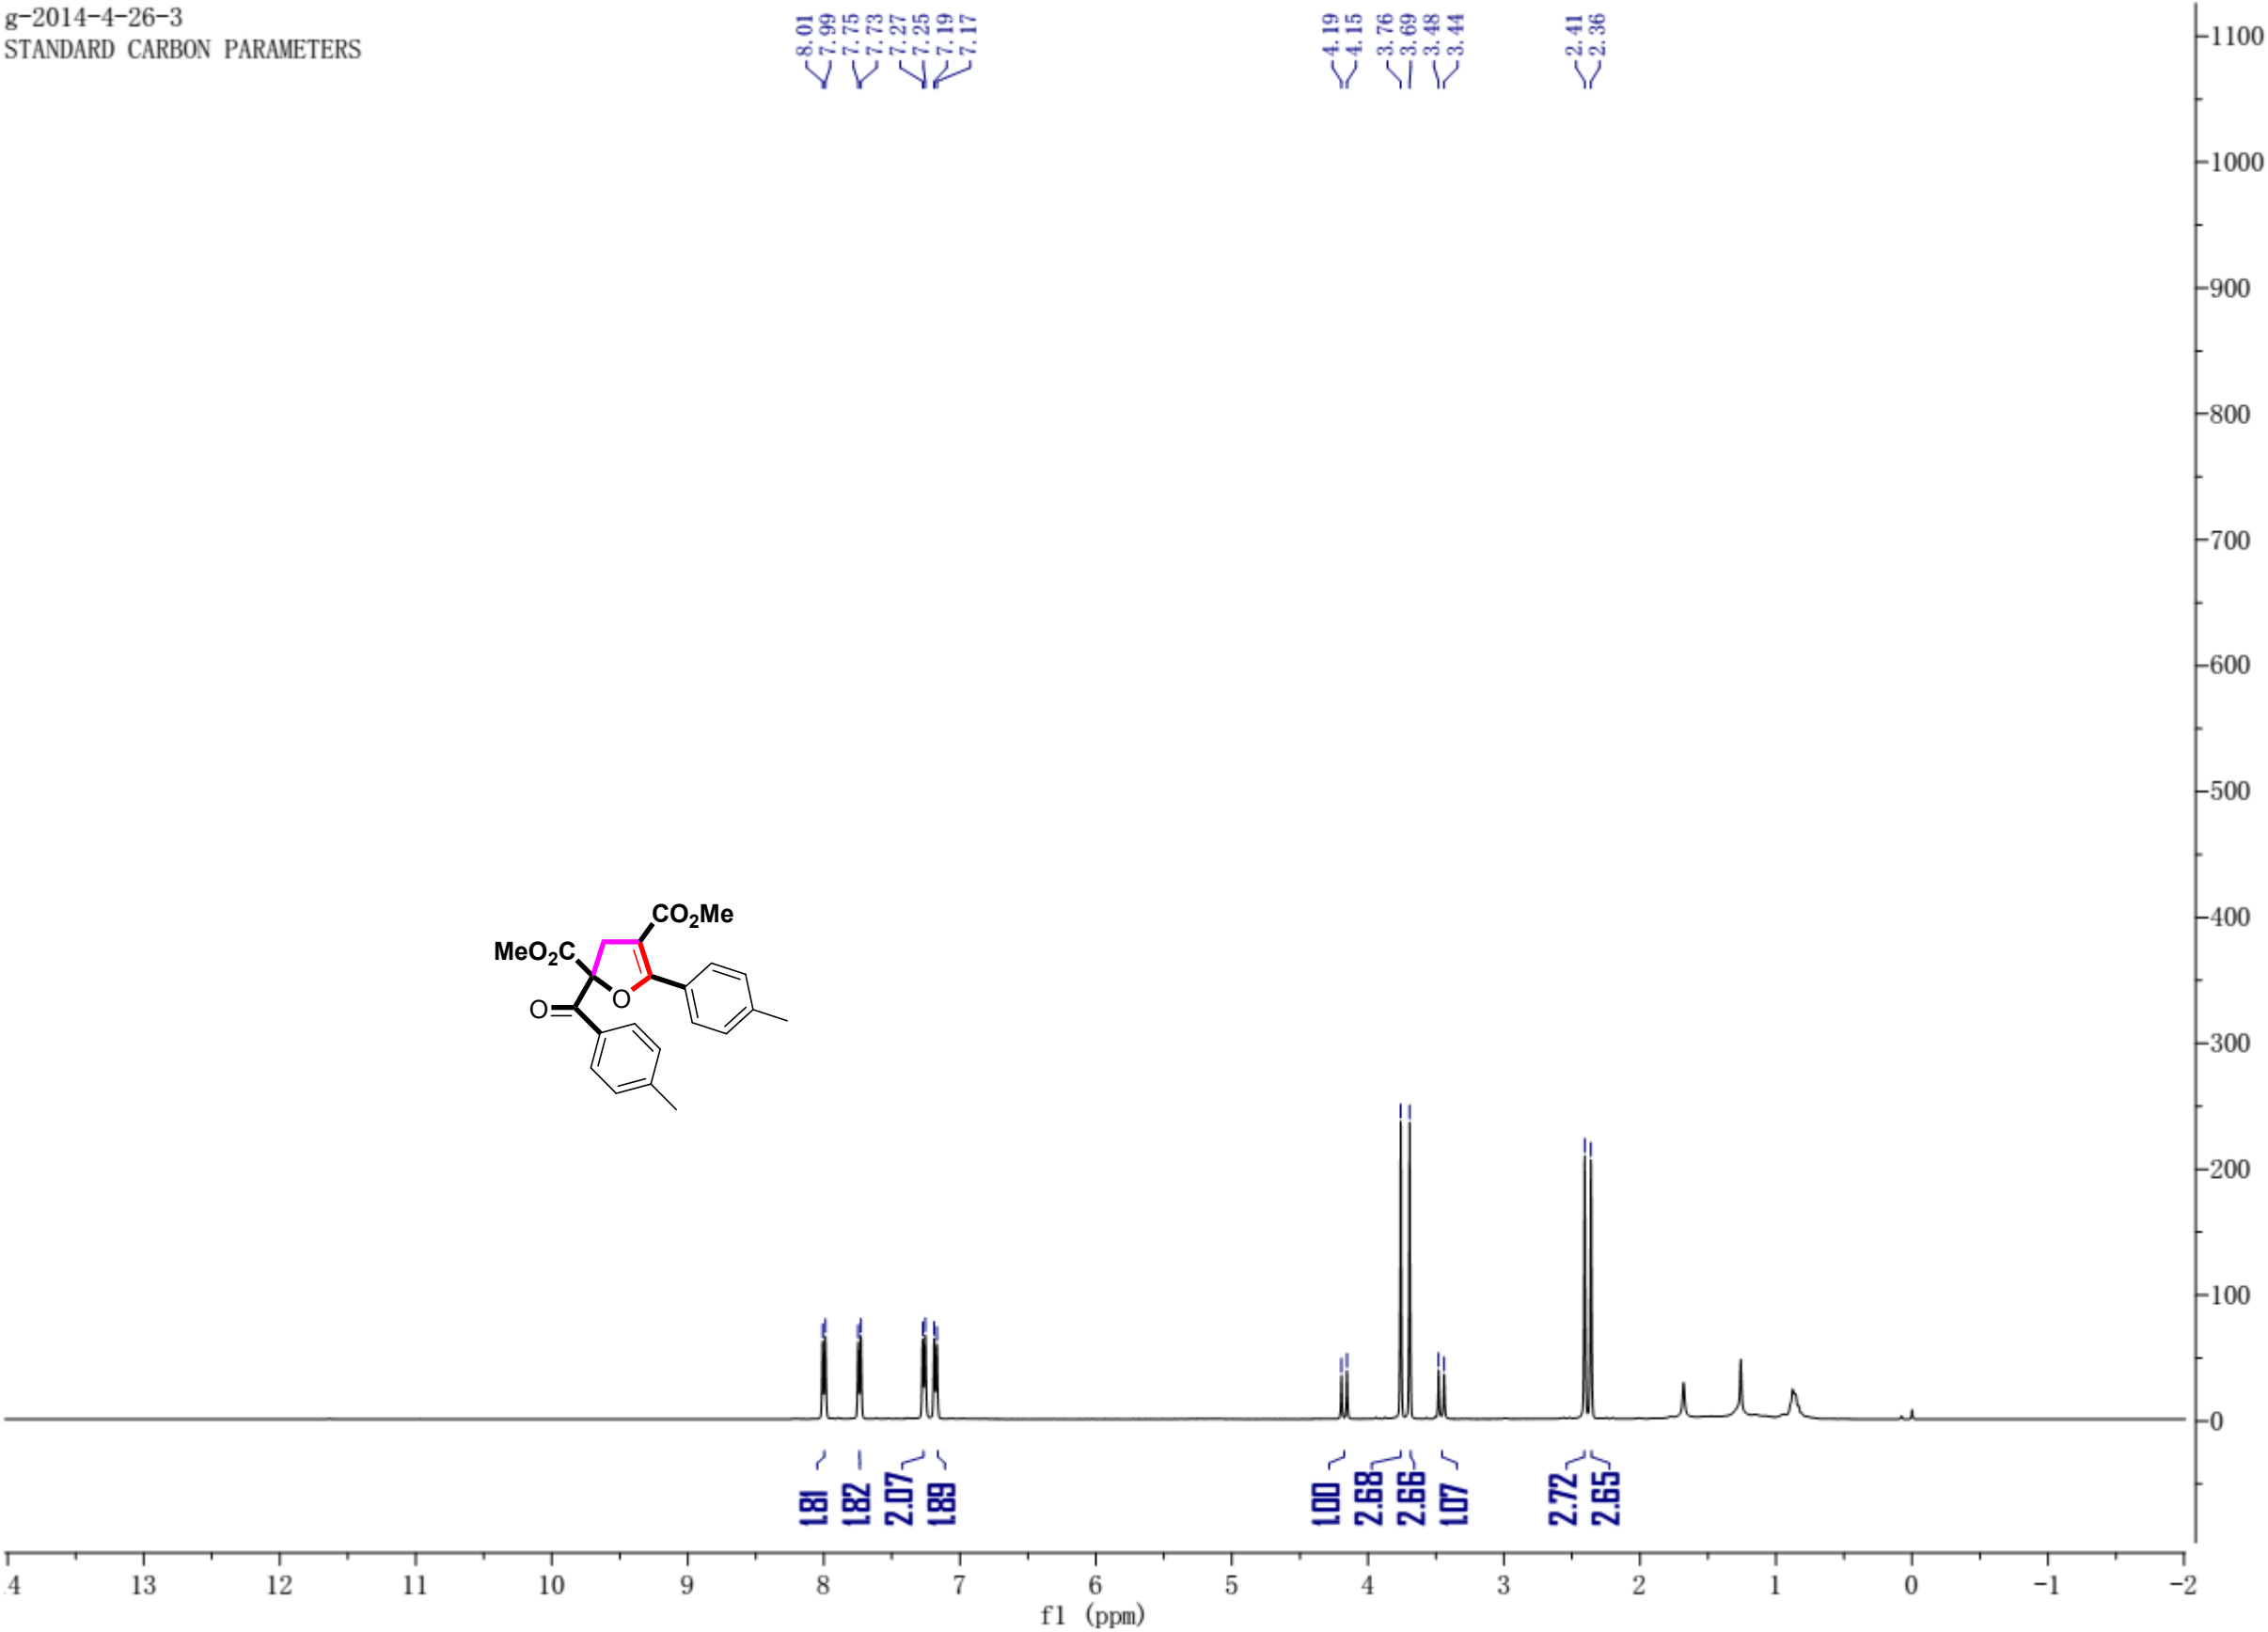

g-2014-4-26-3-c

STANDARD CARBON PARAMETERS

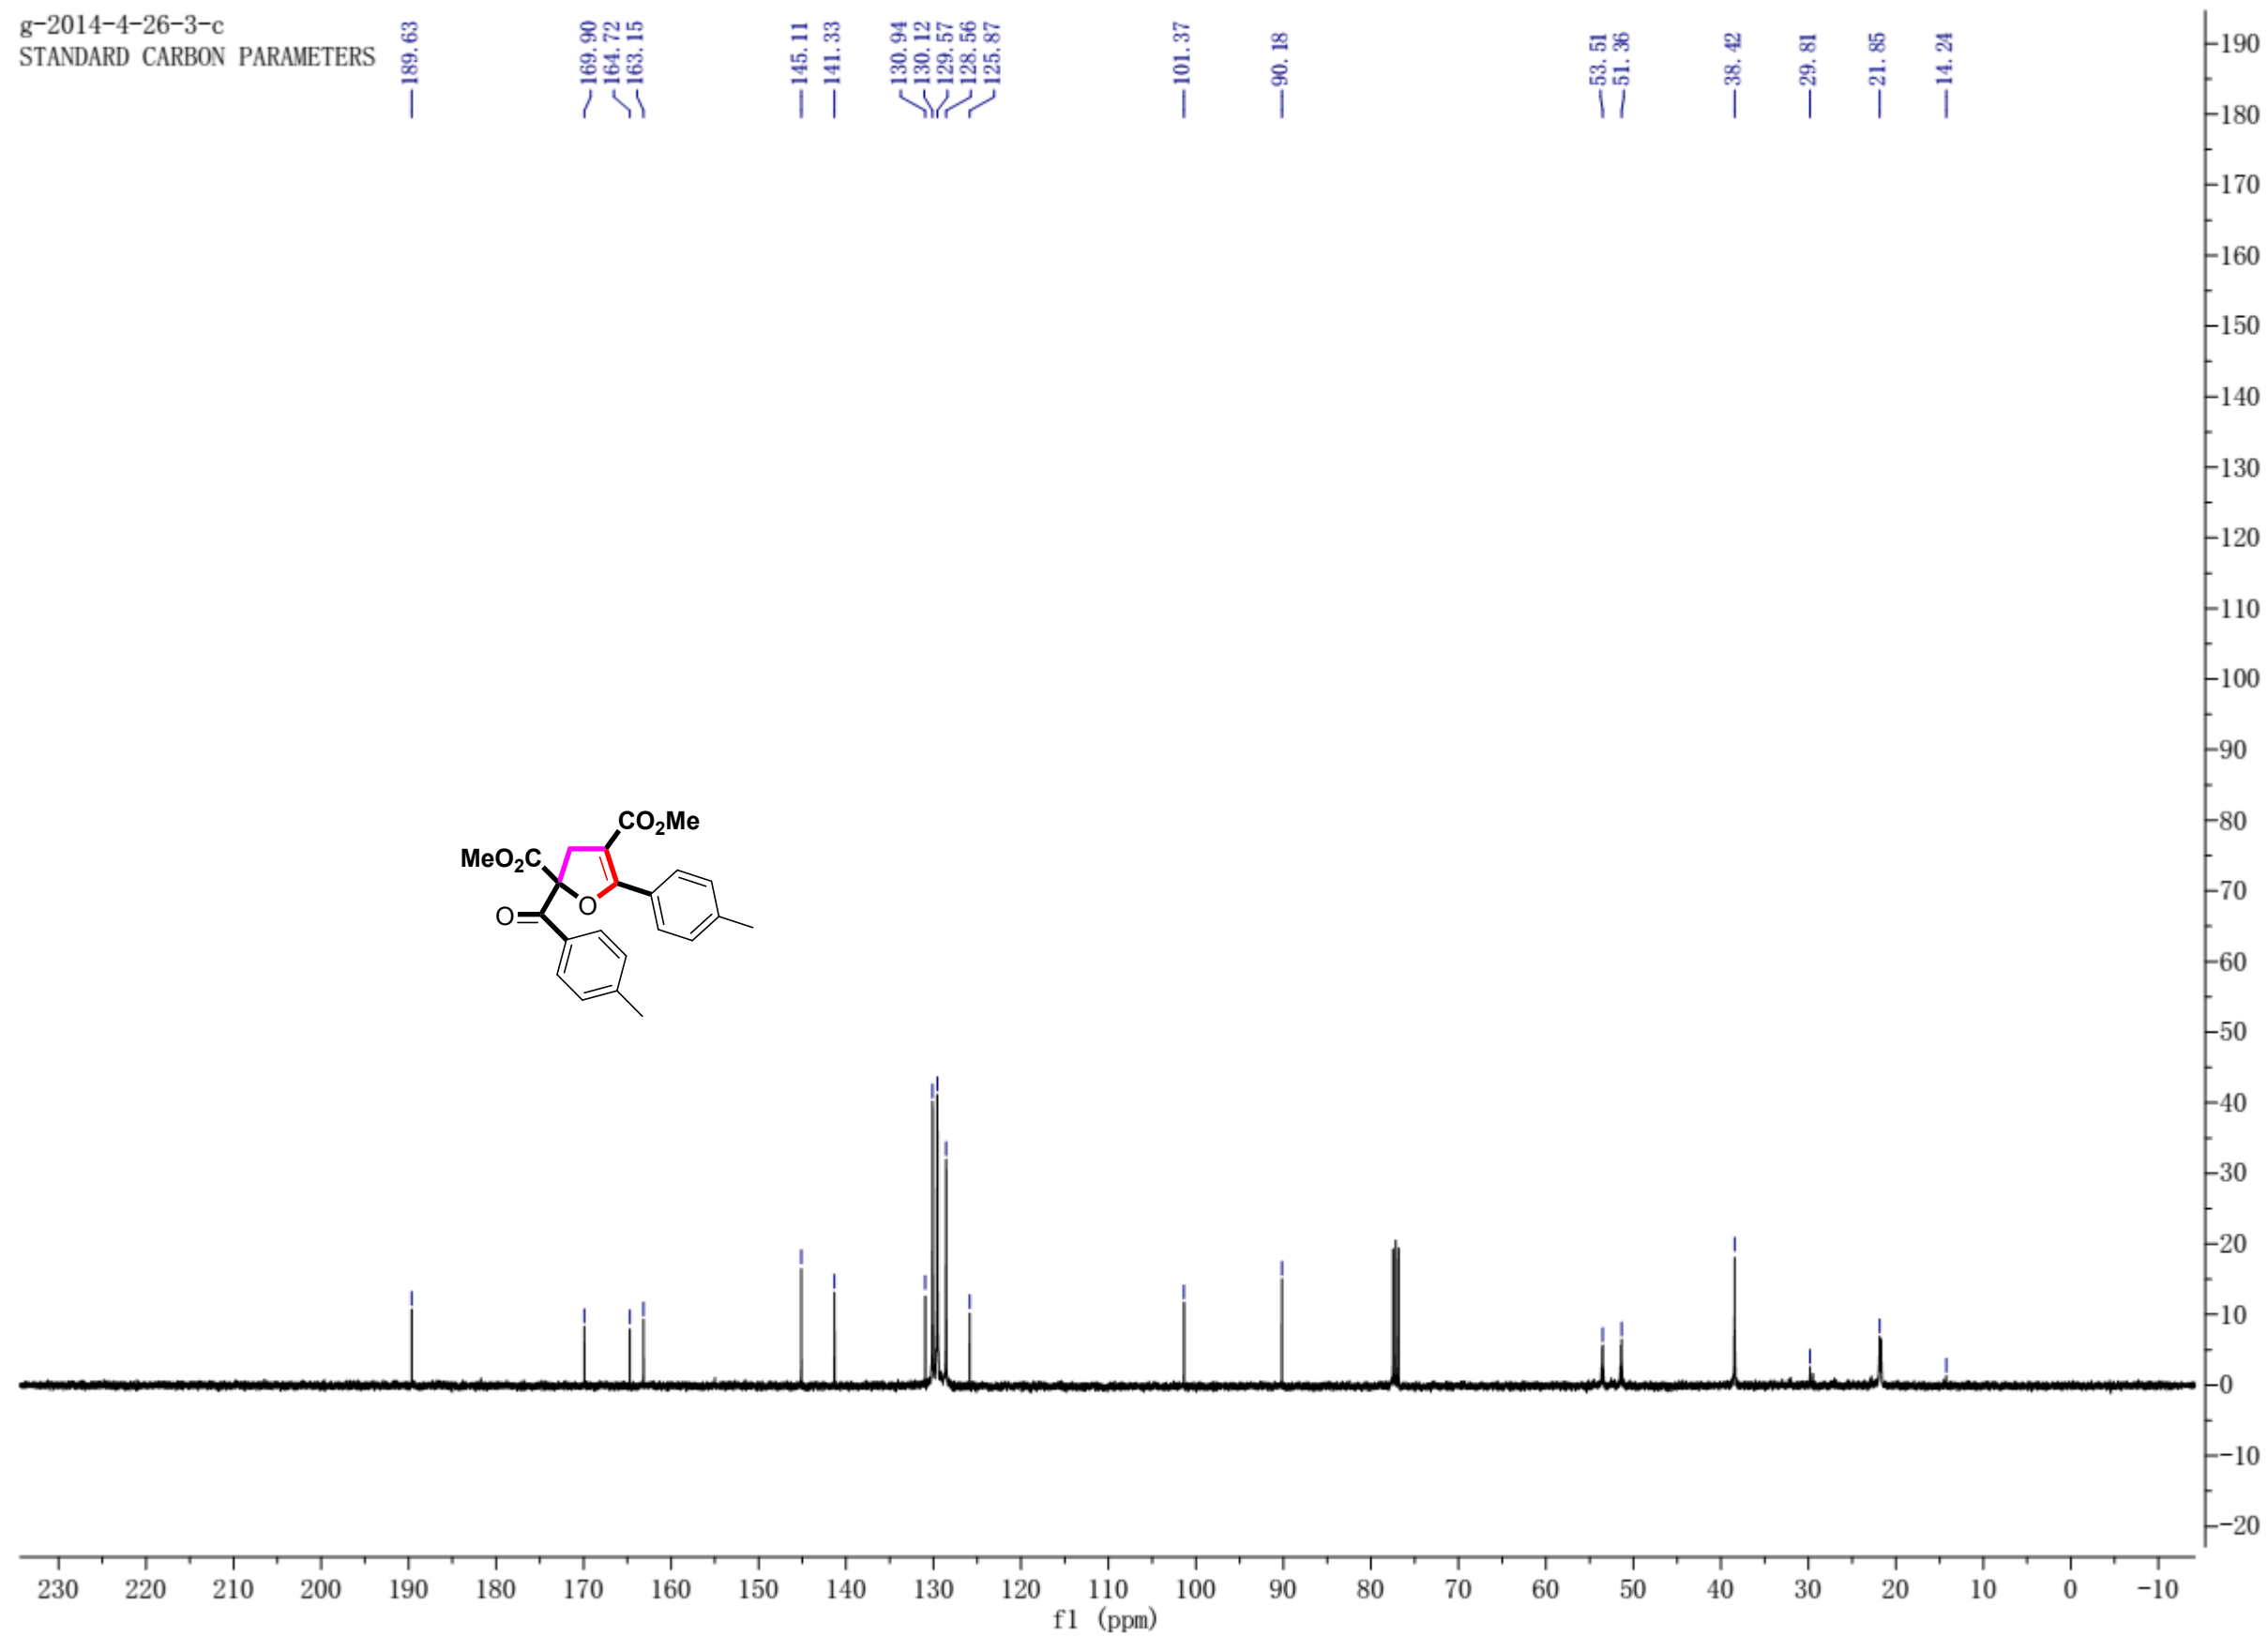

g-2014-4-18-2  
STANDARD CARBON PARAMETERS

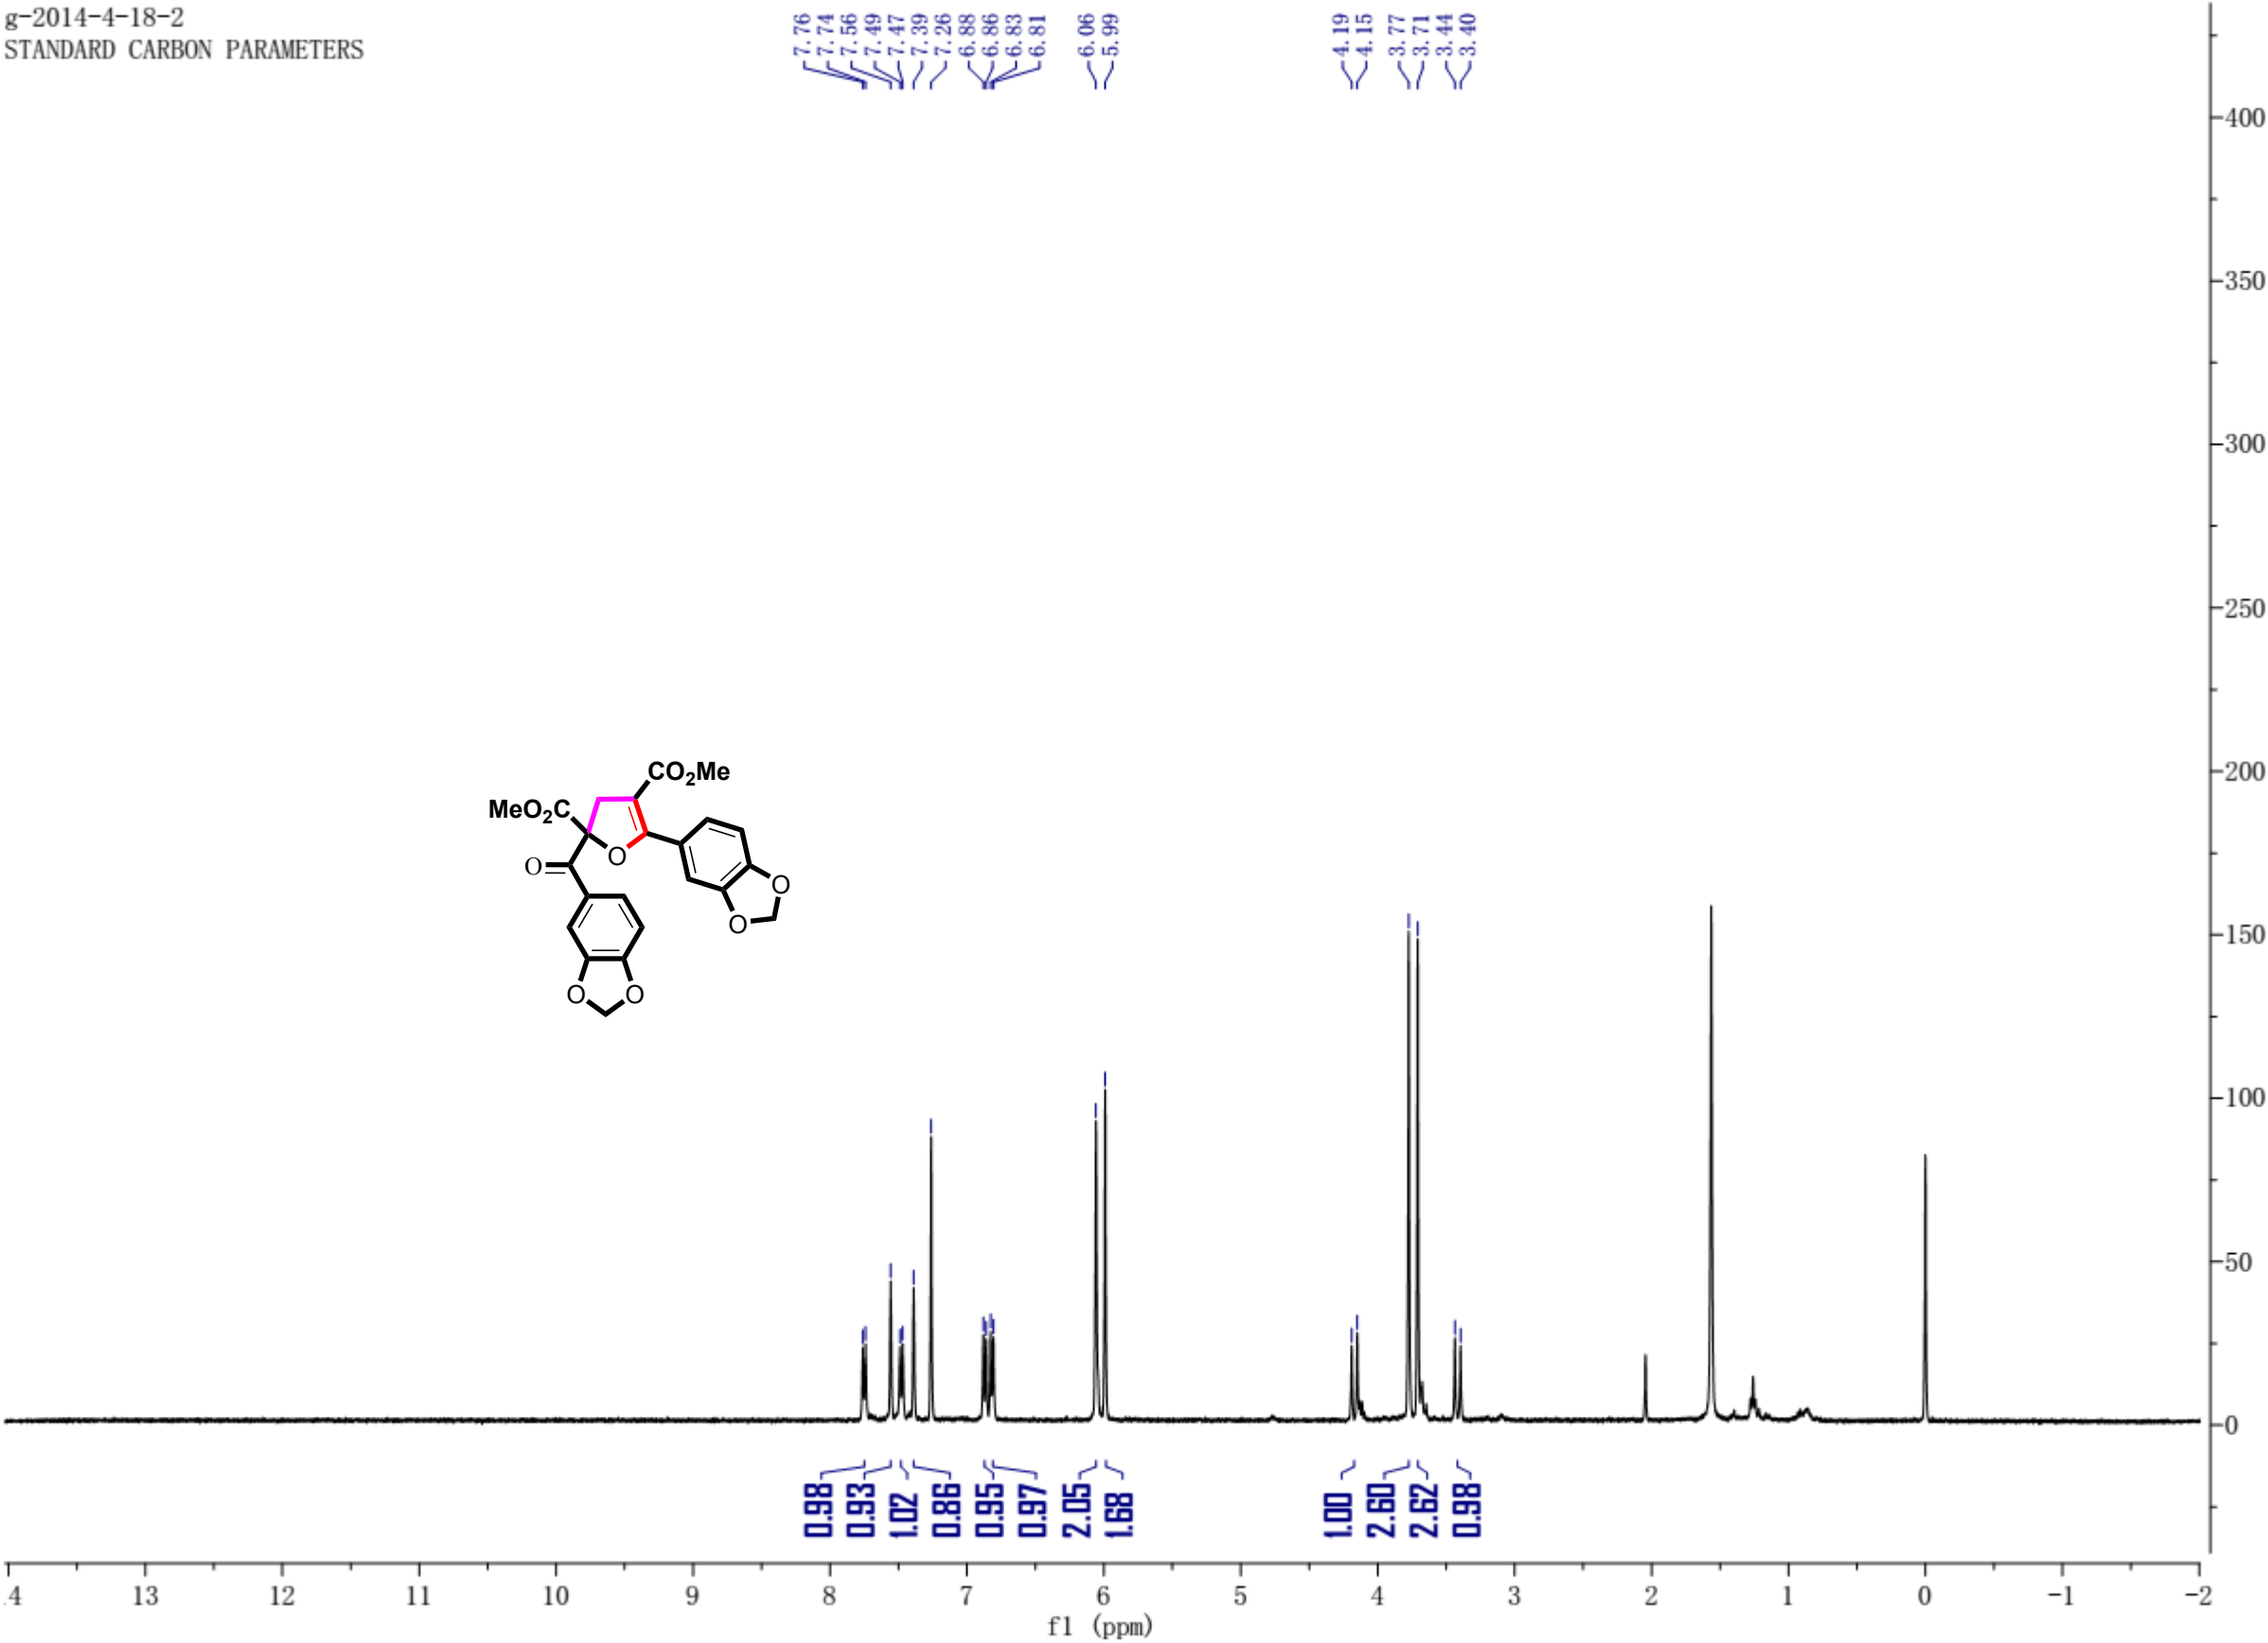

g-2014-4-18-2-2-c

STANDARD CARBON PARAMETERS

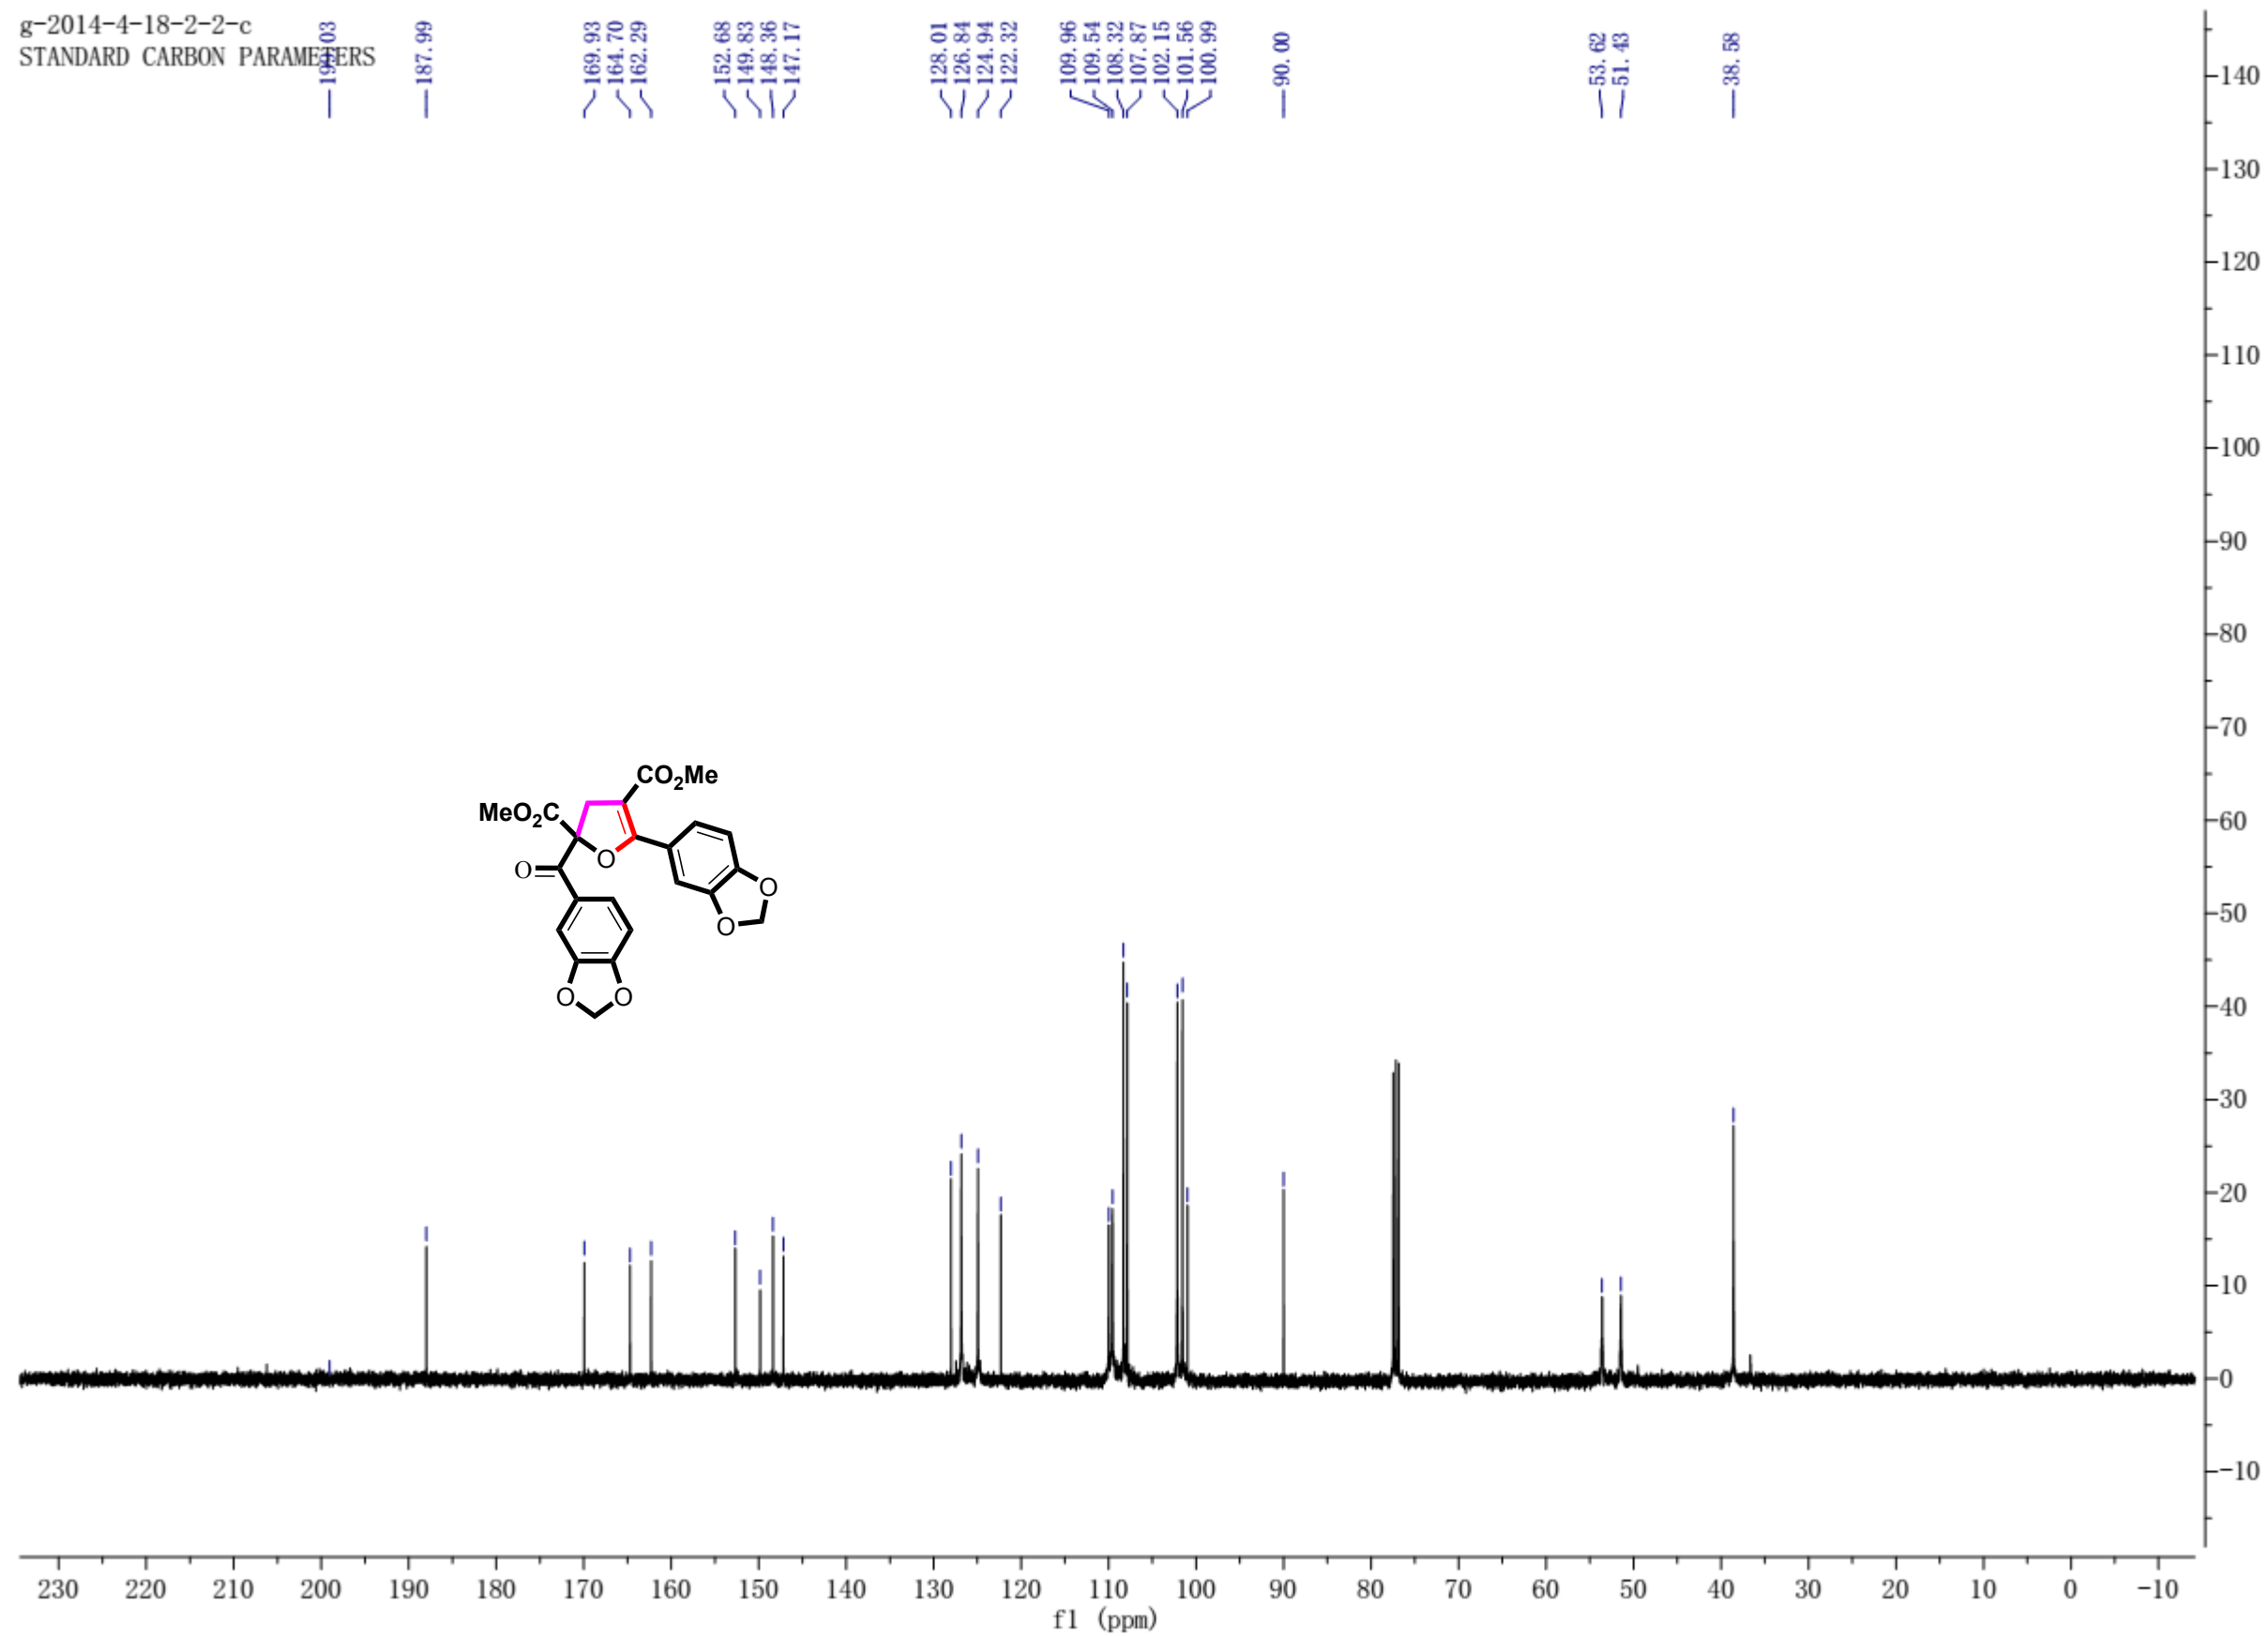



g-2014-4-18-11  
STANDARD CARBON PARAMETERS

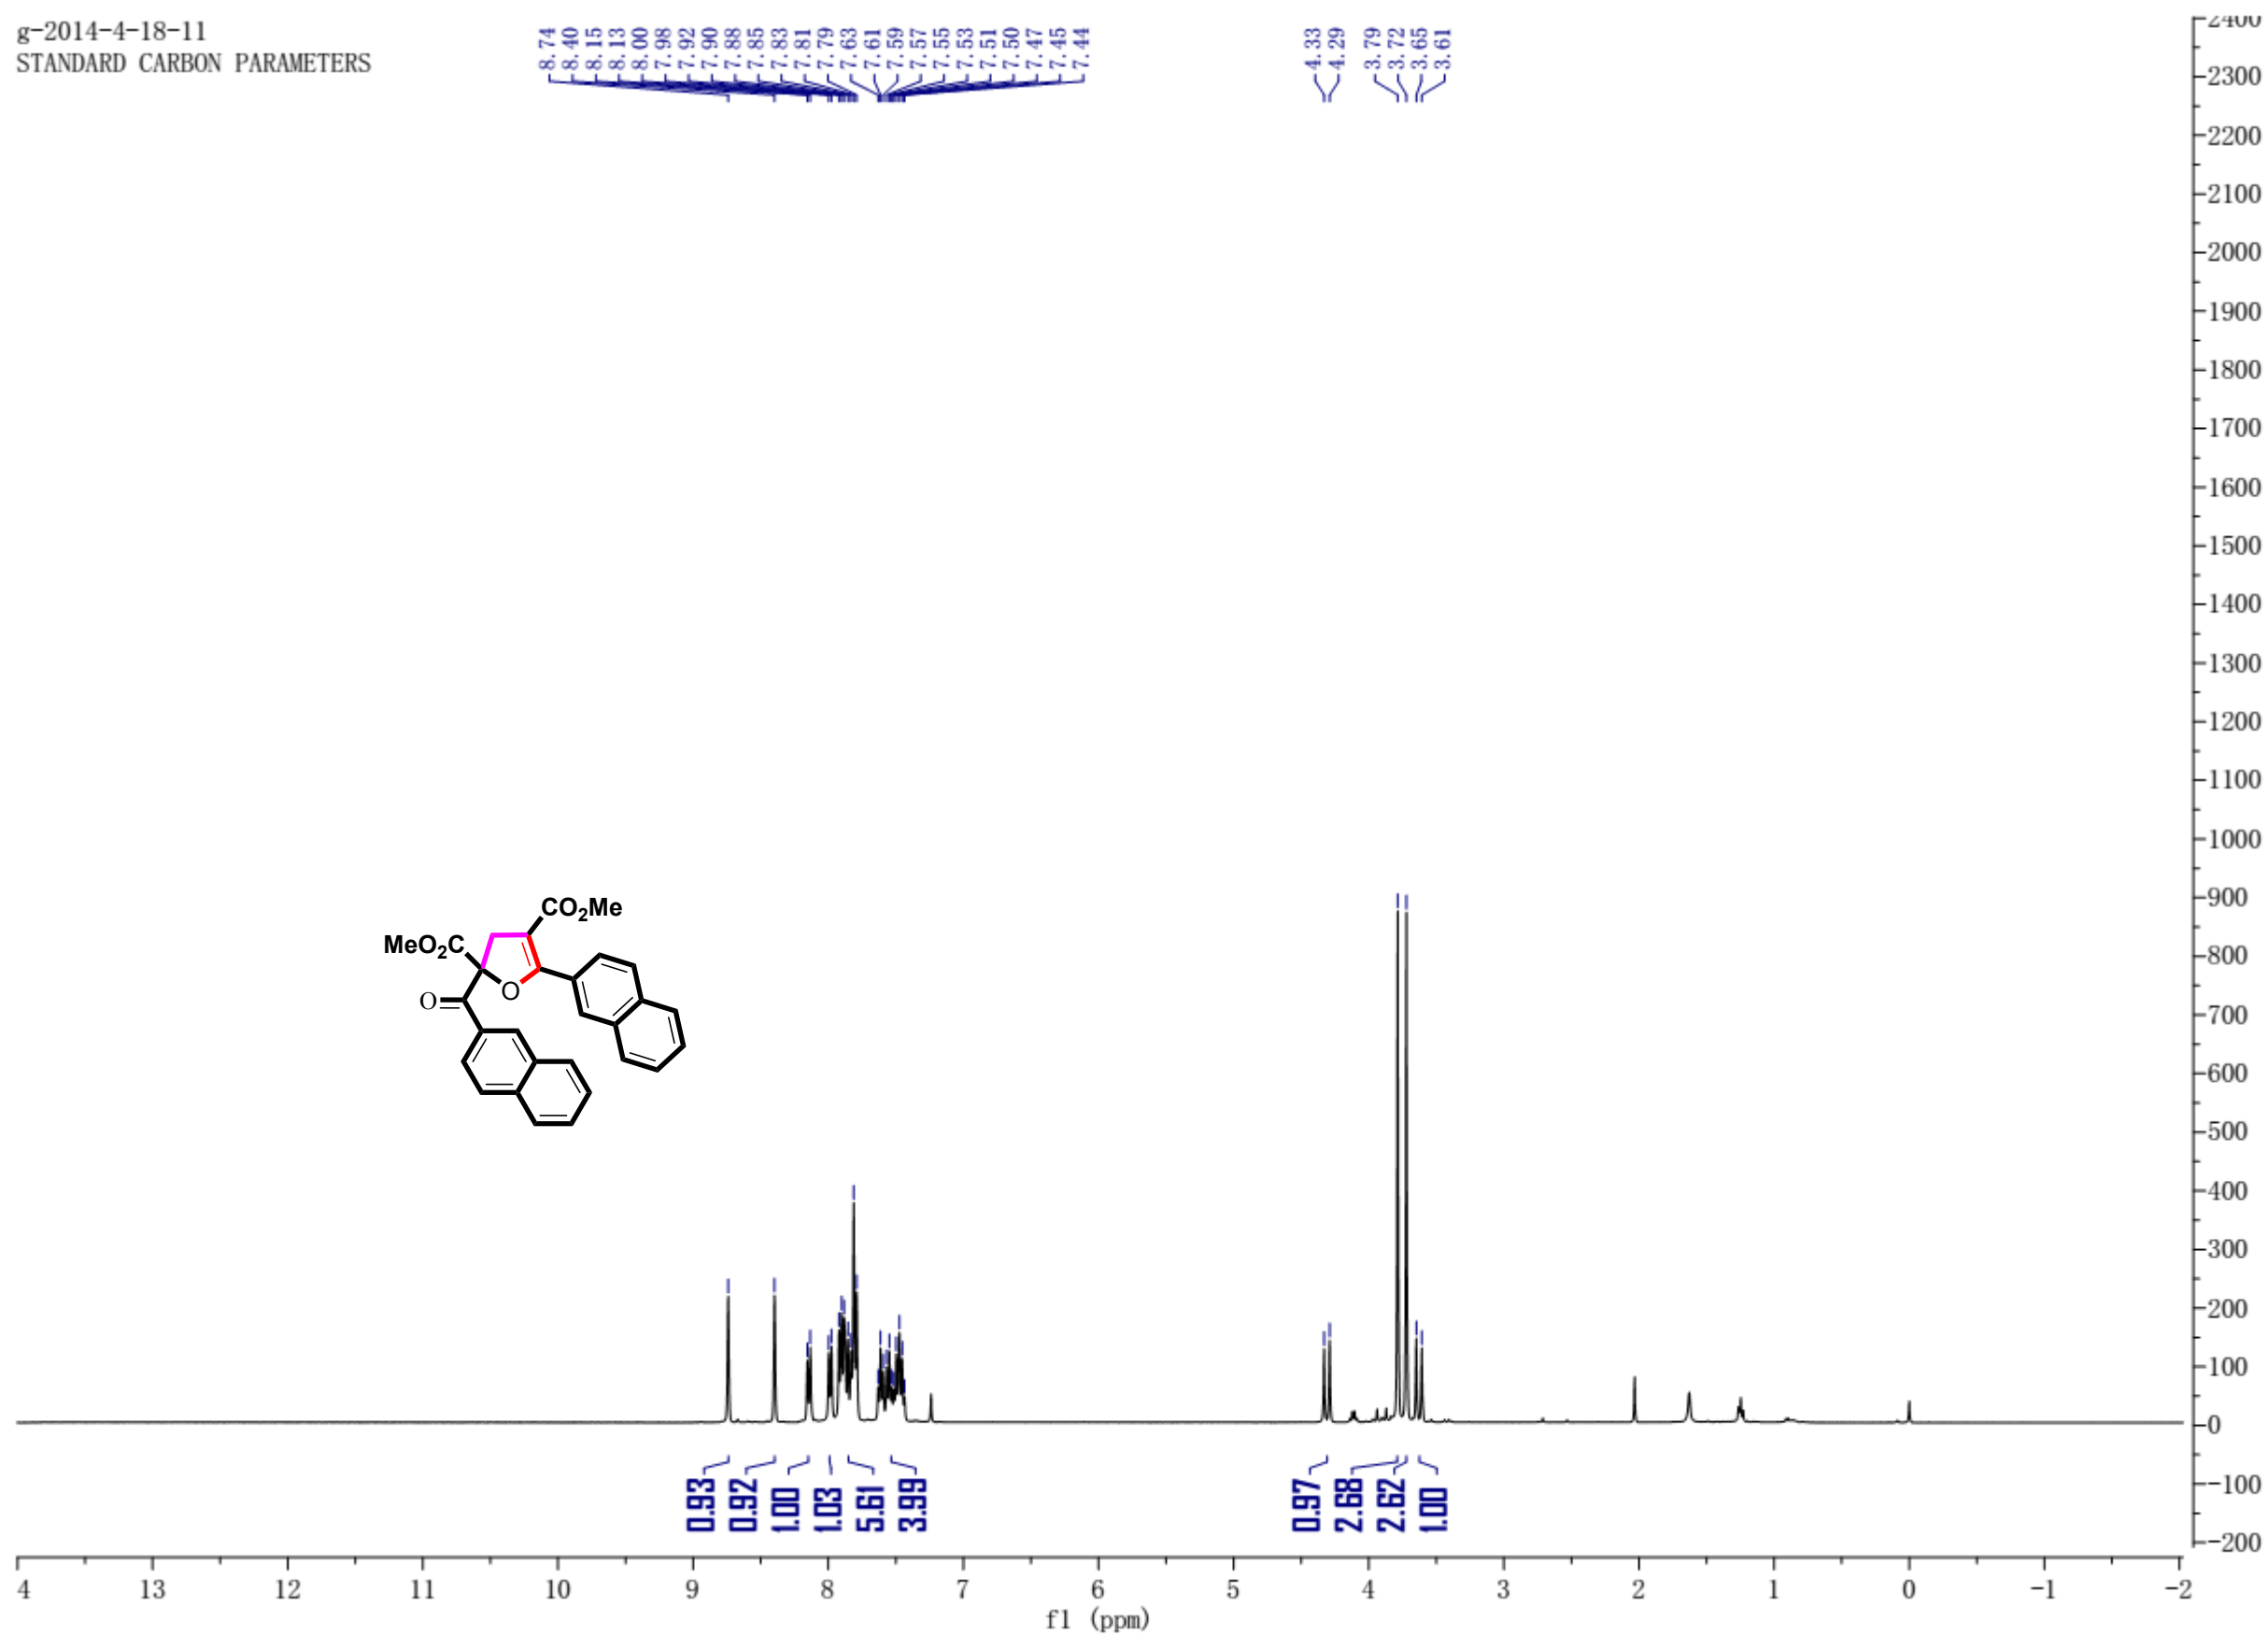

g-2014-4-18-11-c

STANDARD CARBON PARAMETERS

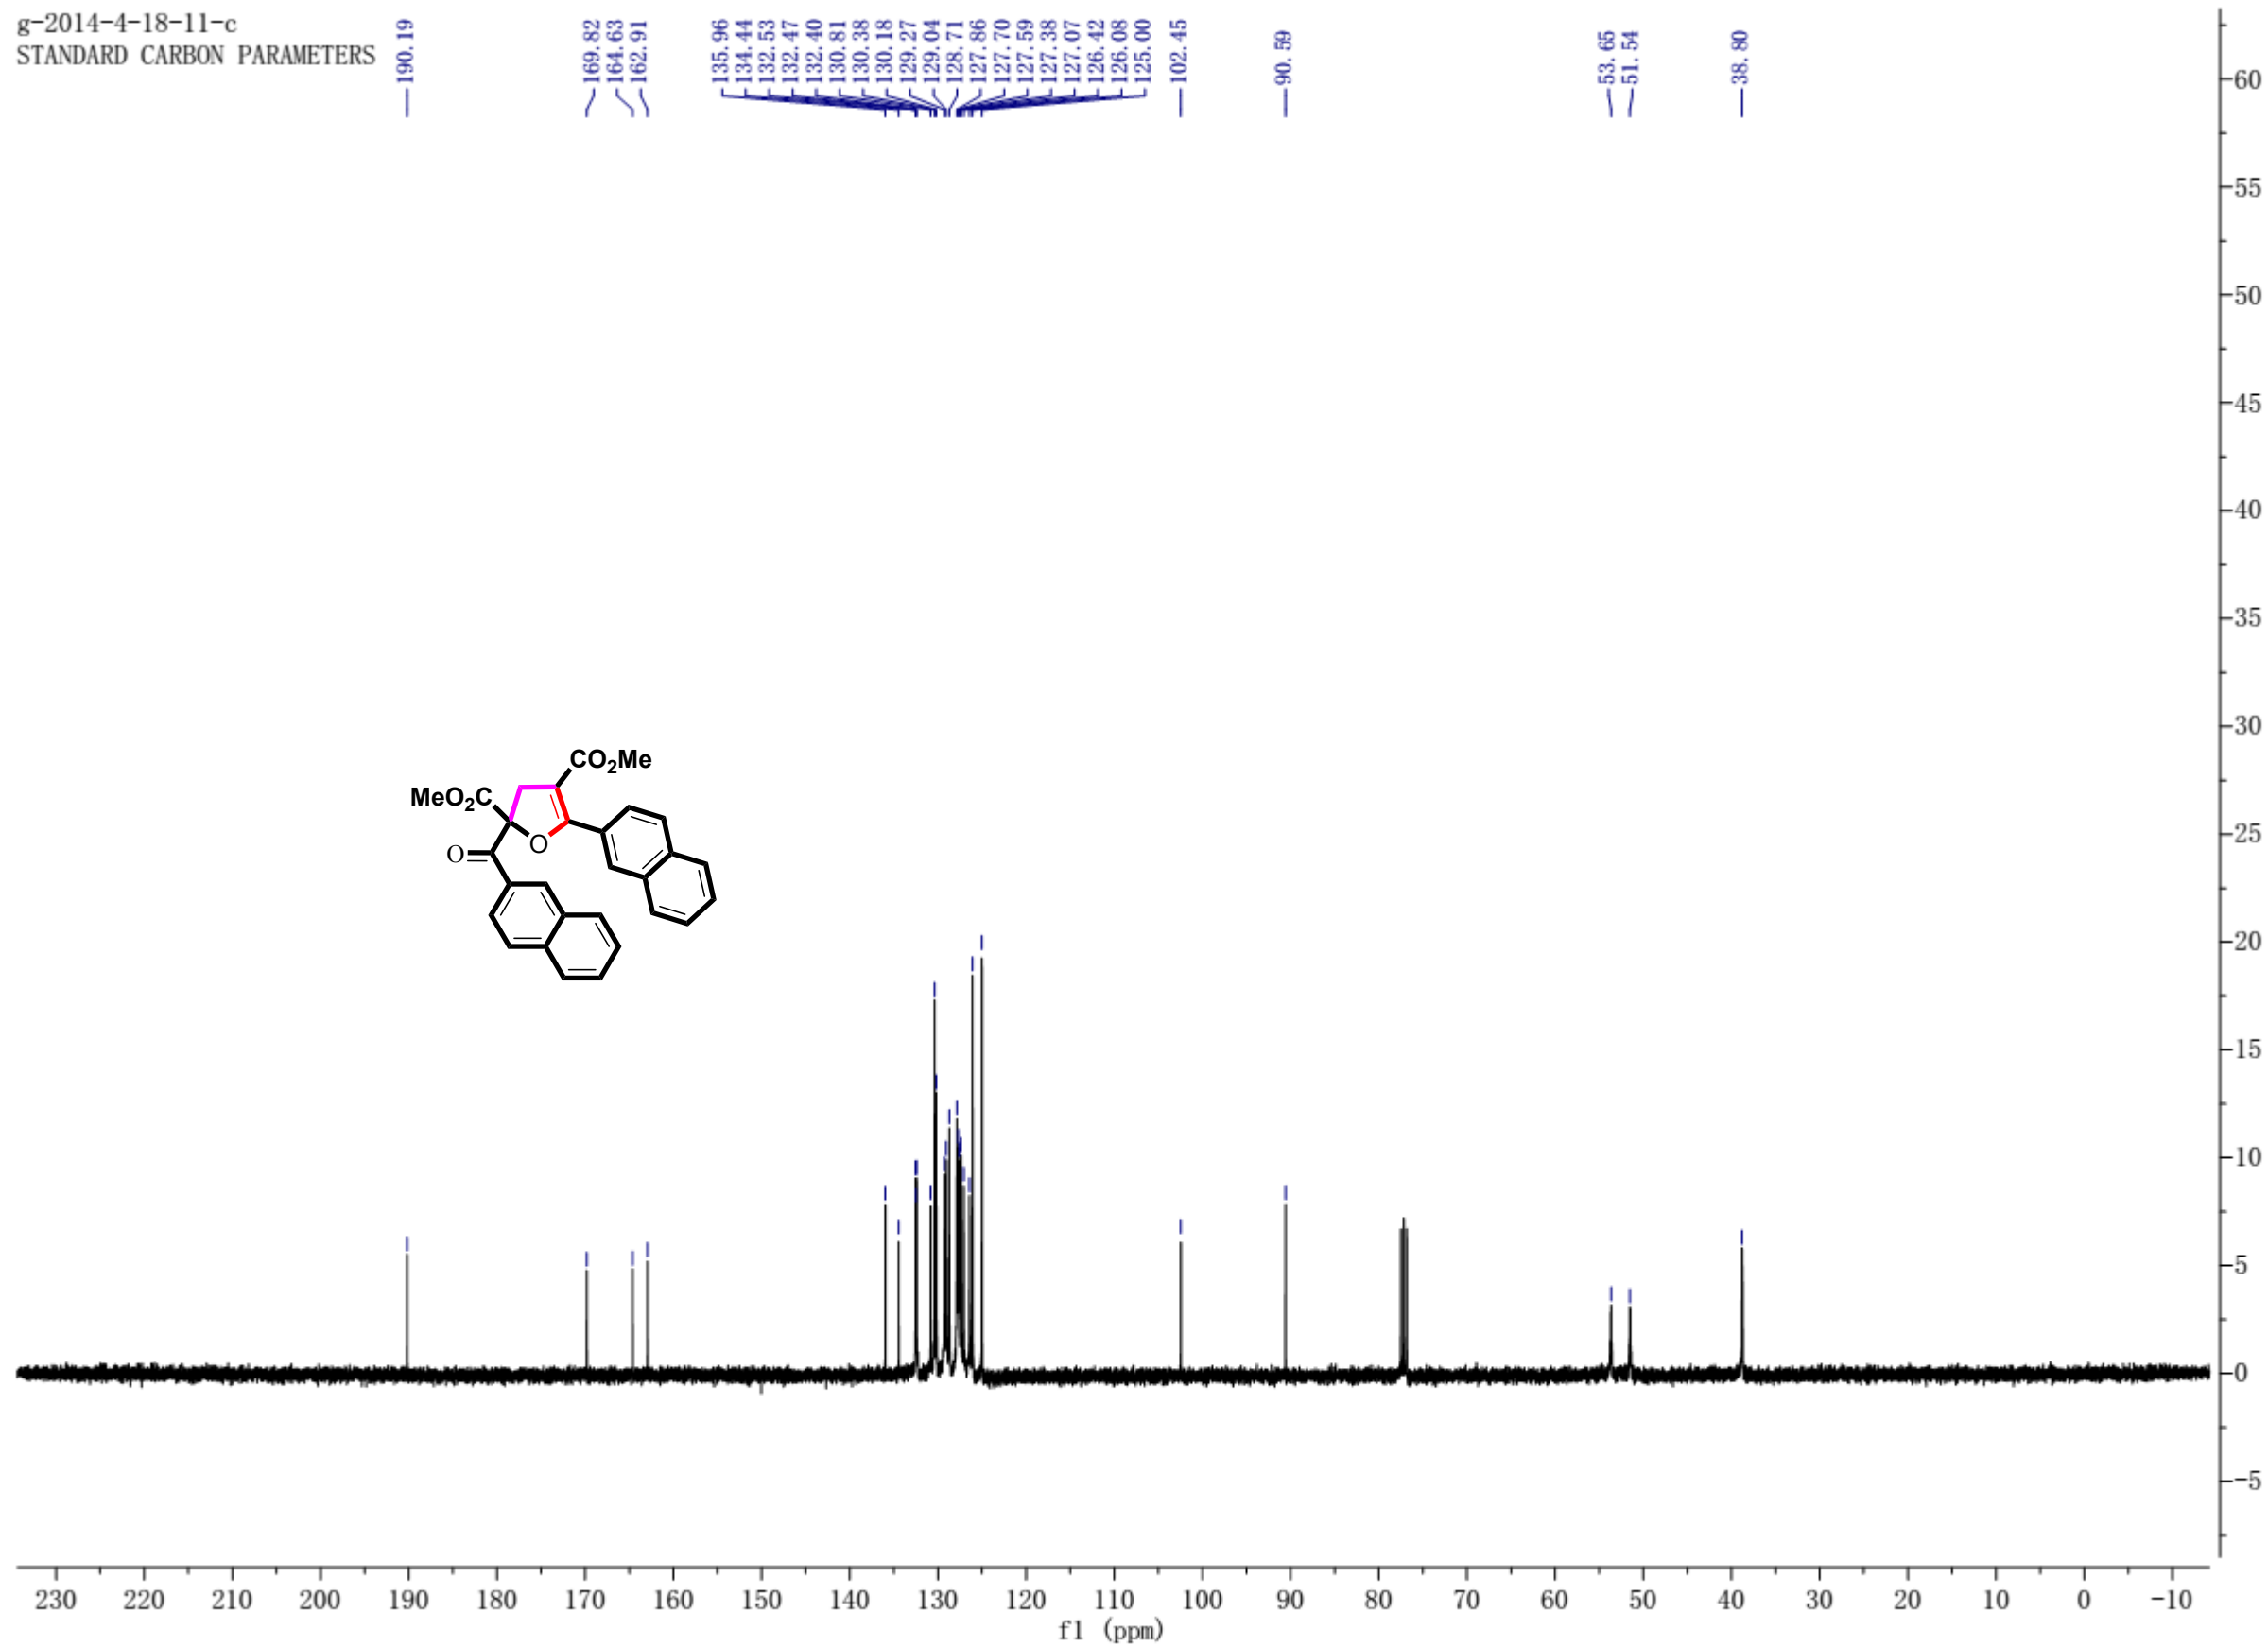

g-2014-4-18-10

STANDARD CARBON PARAMETER

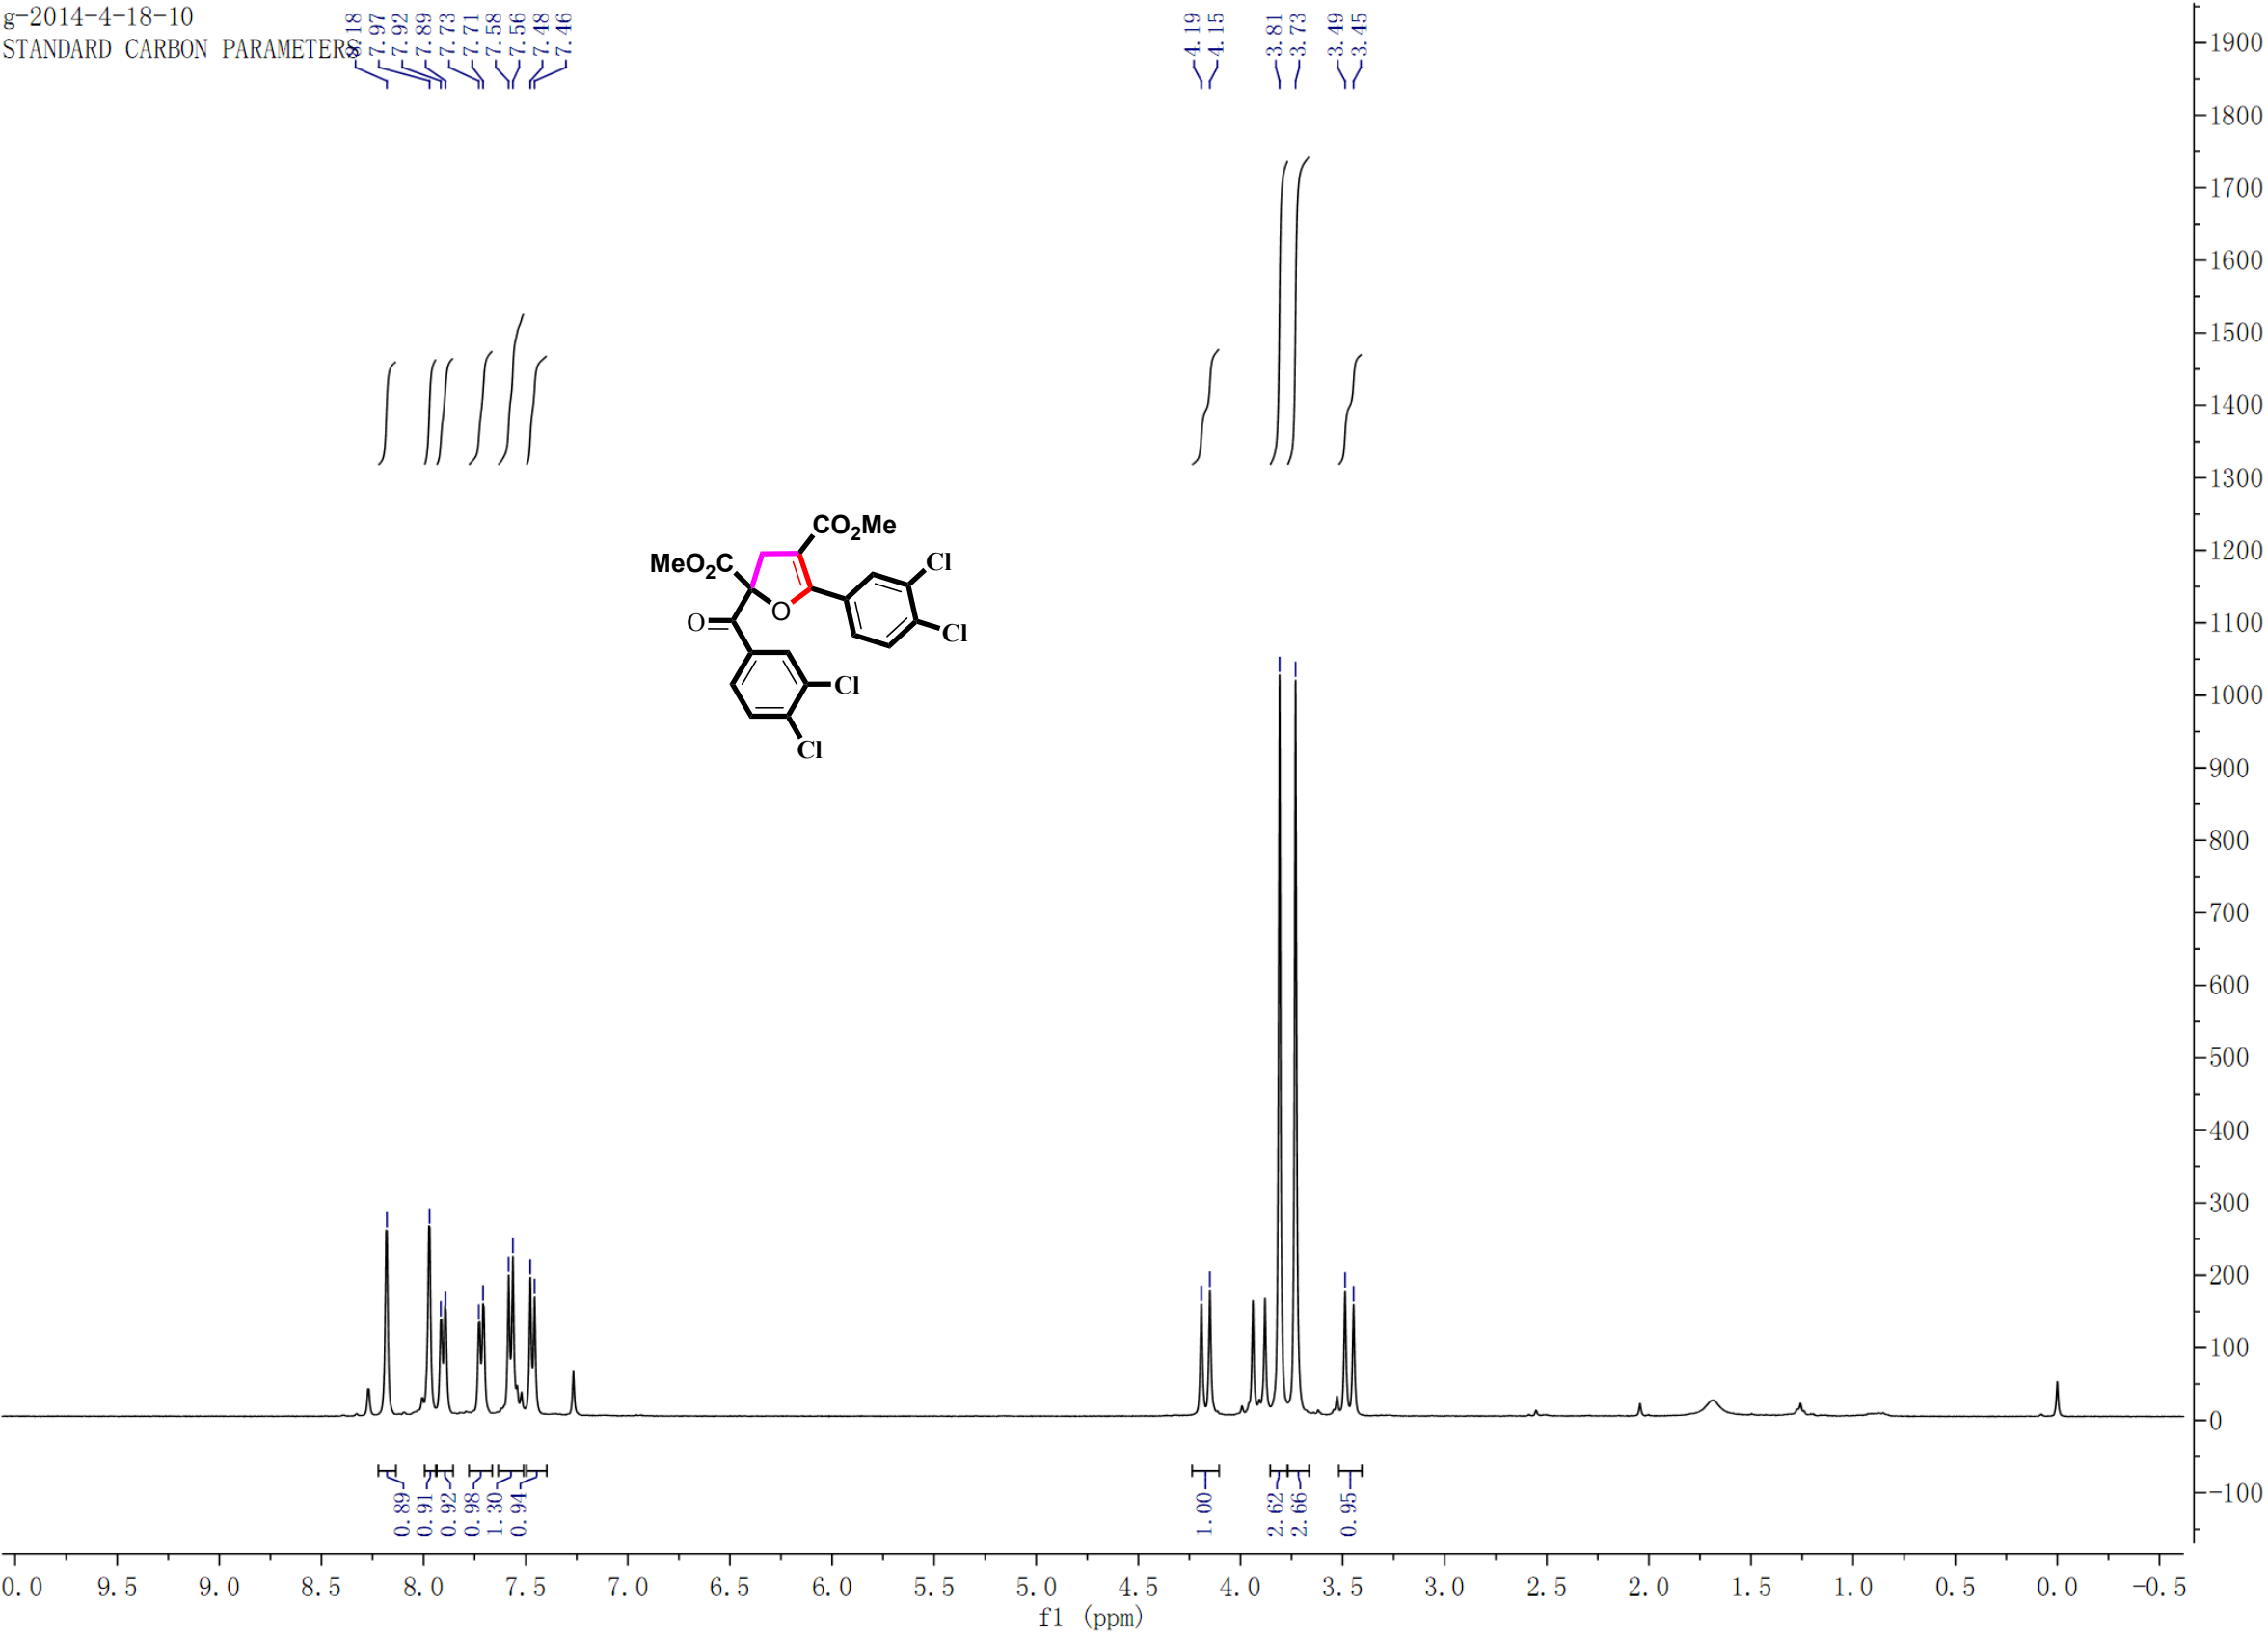

g-2014-4-18-10-c  
STANDARD CARBON PARAMETERS

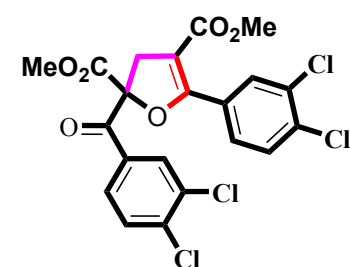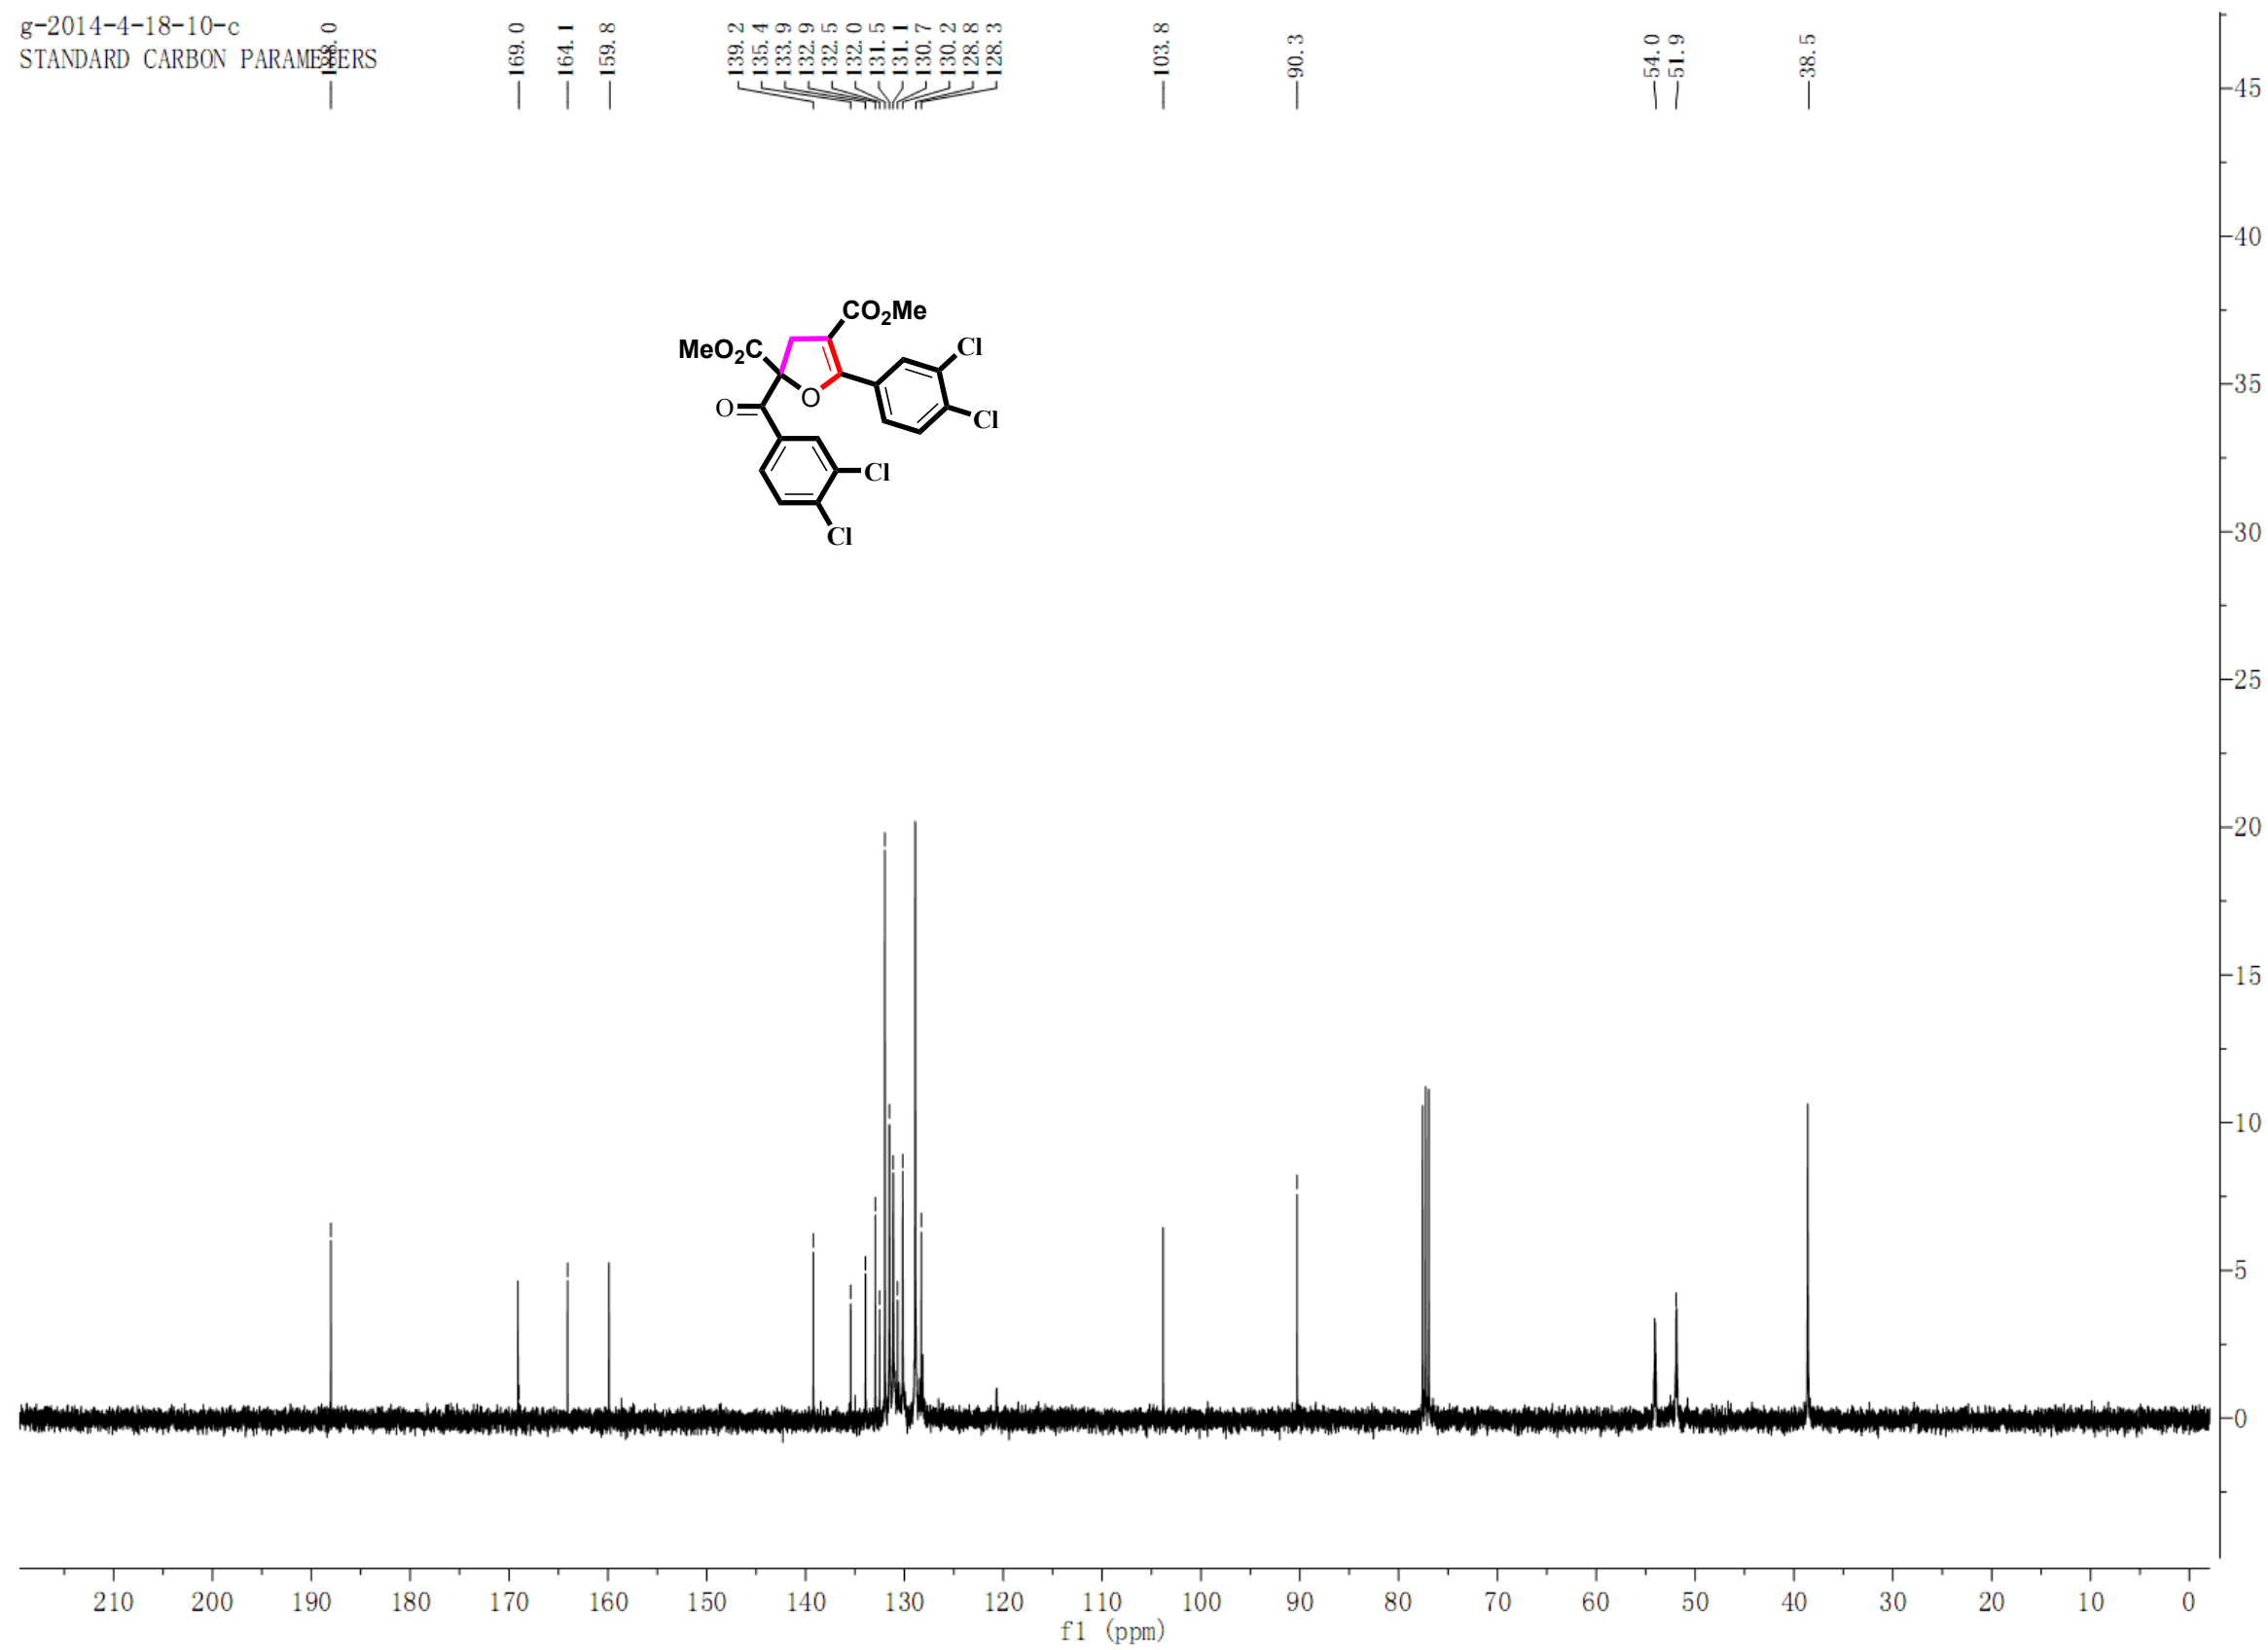

g-2014-4-18-1  
STANDARD CARBON PARAMETERS

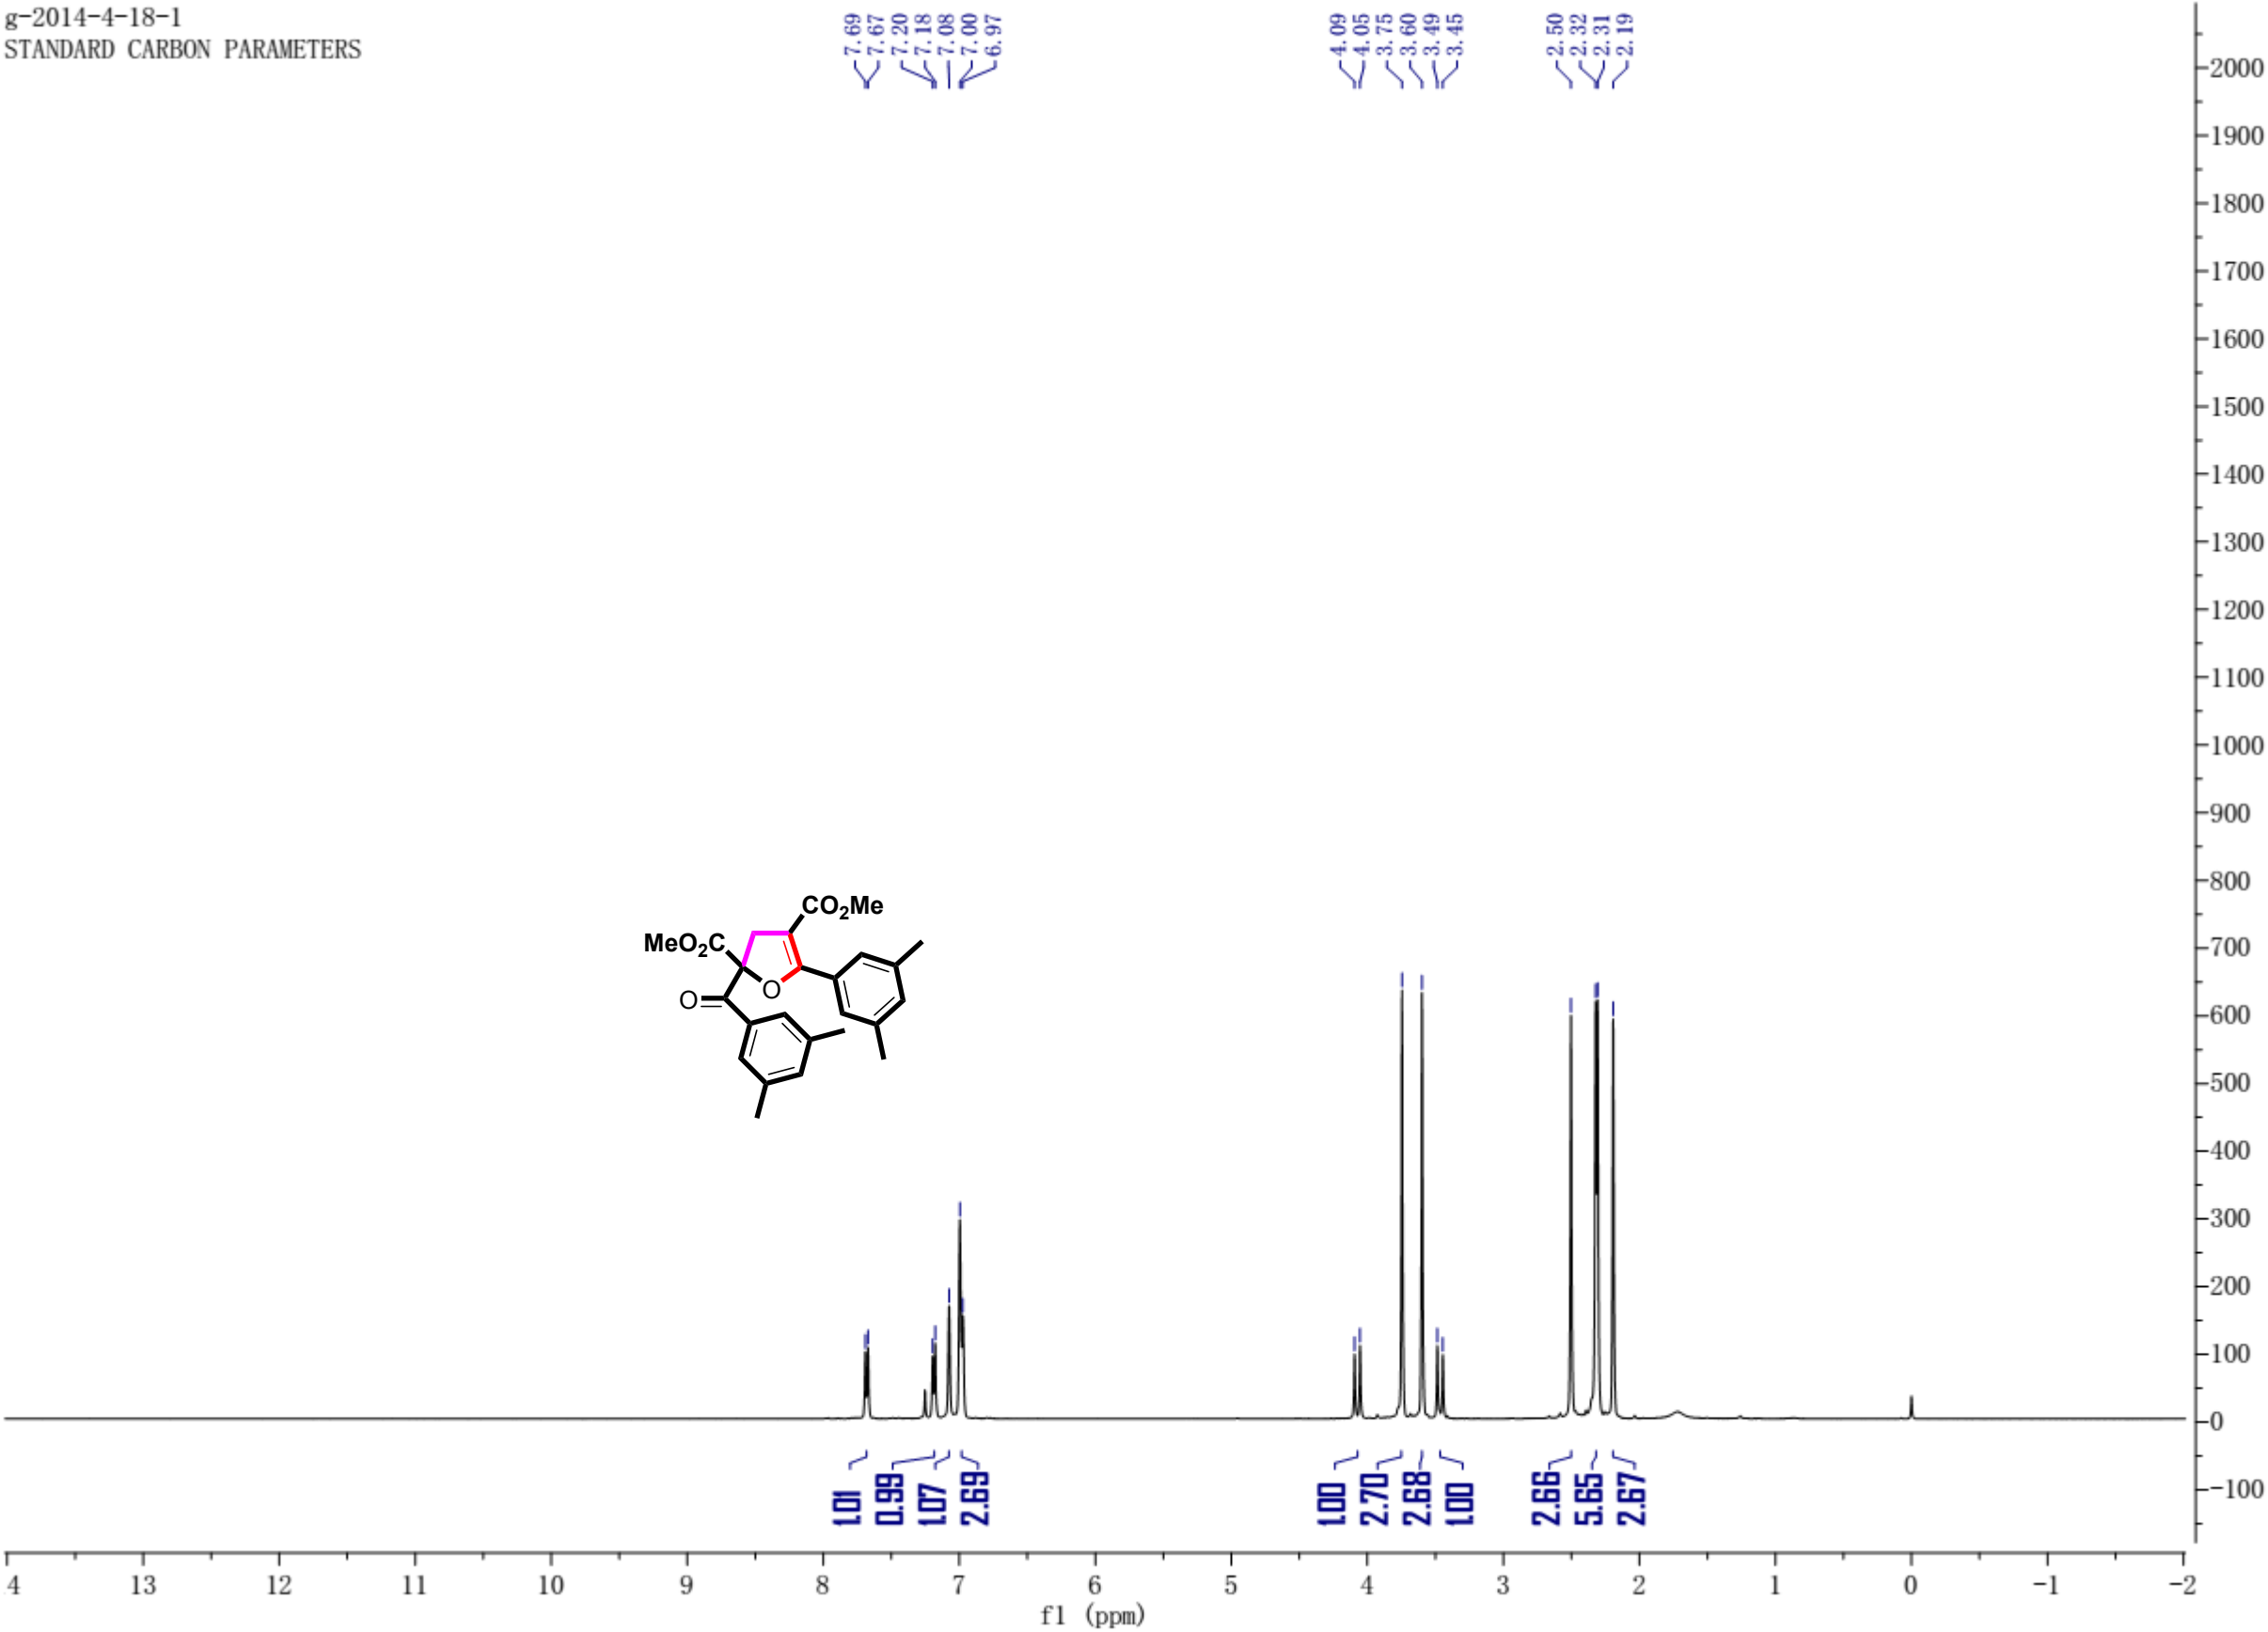

g-2014-4-18-1-c

STANDARD CARBON PARAMETERS

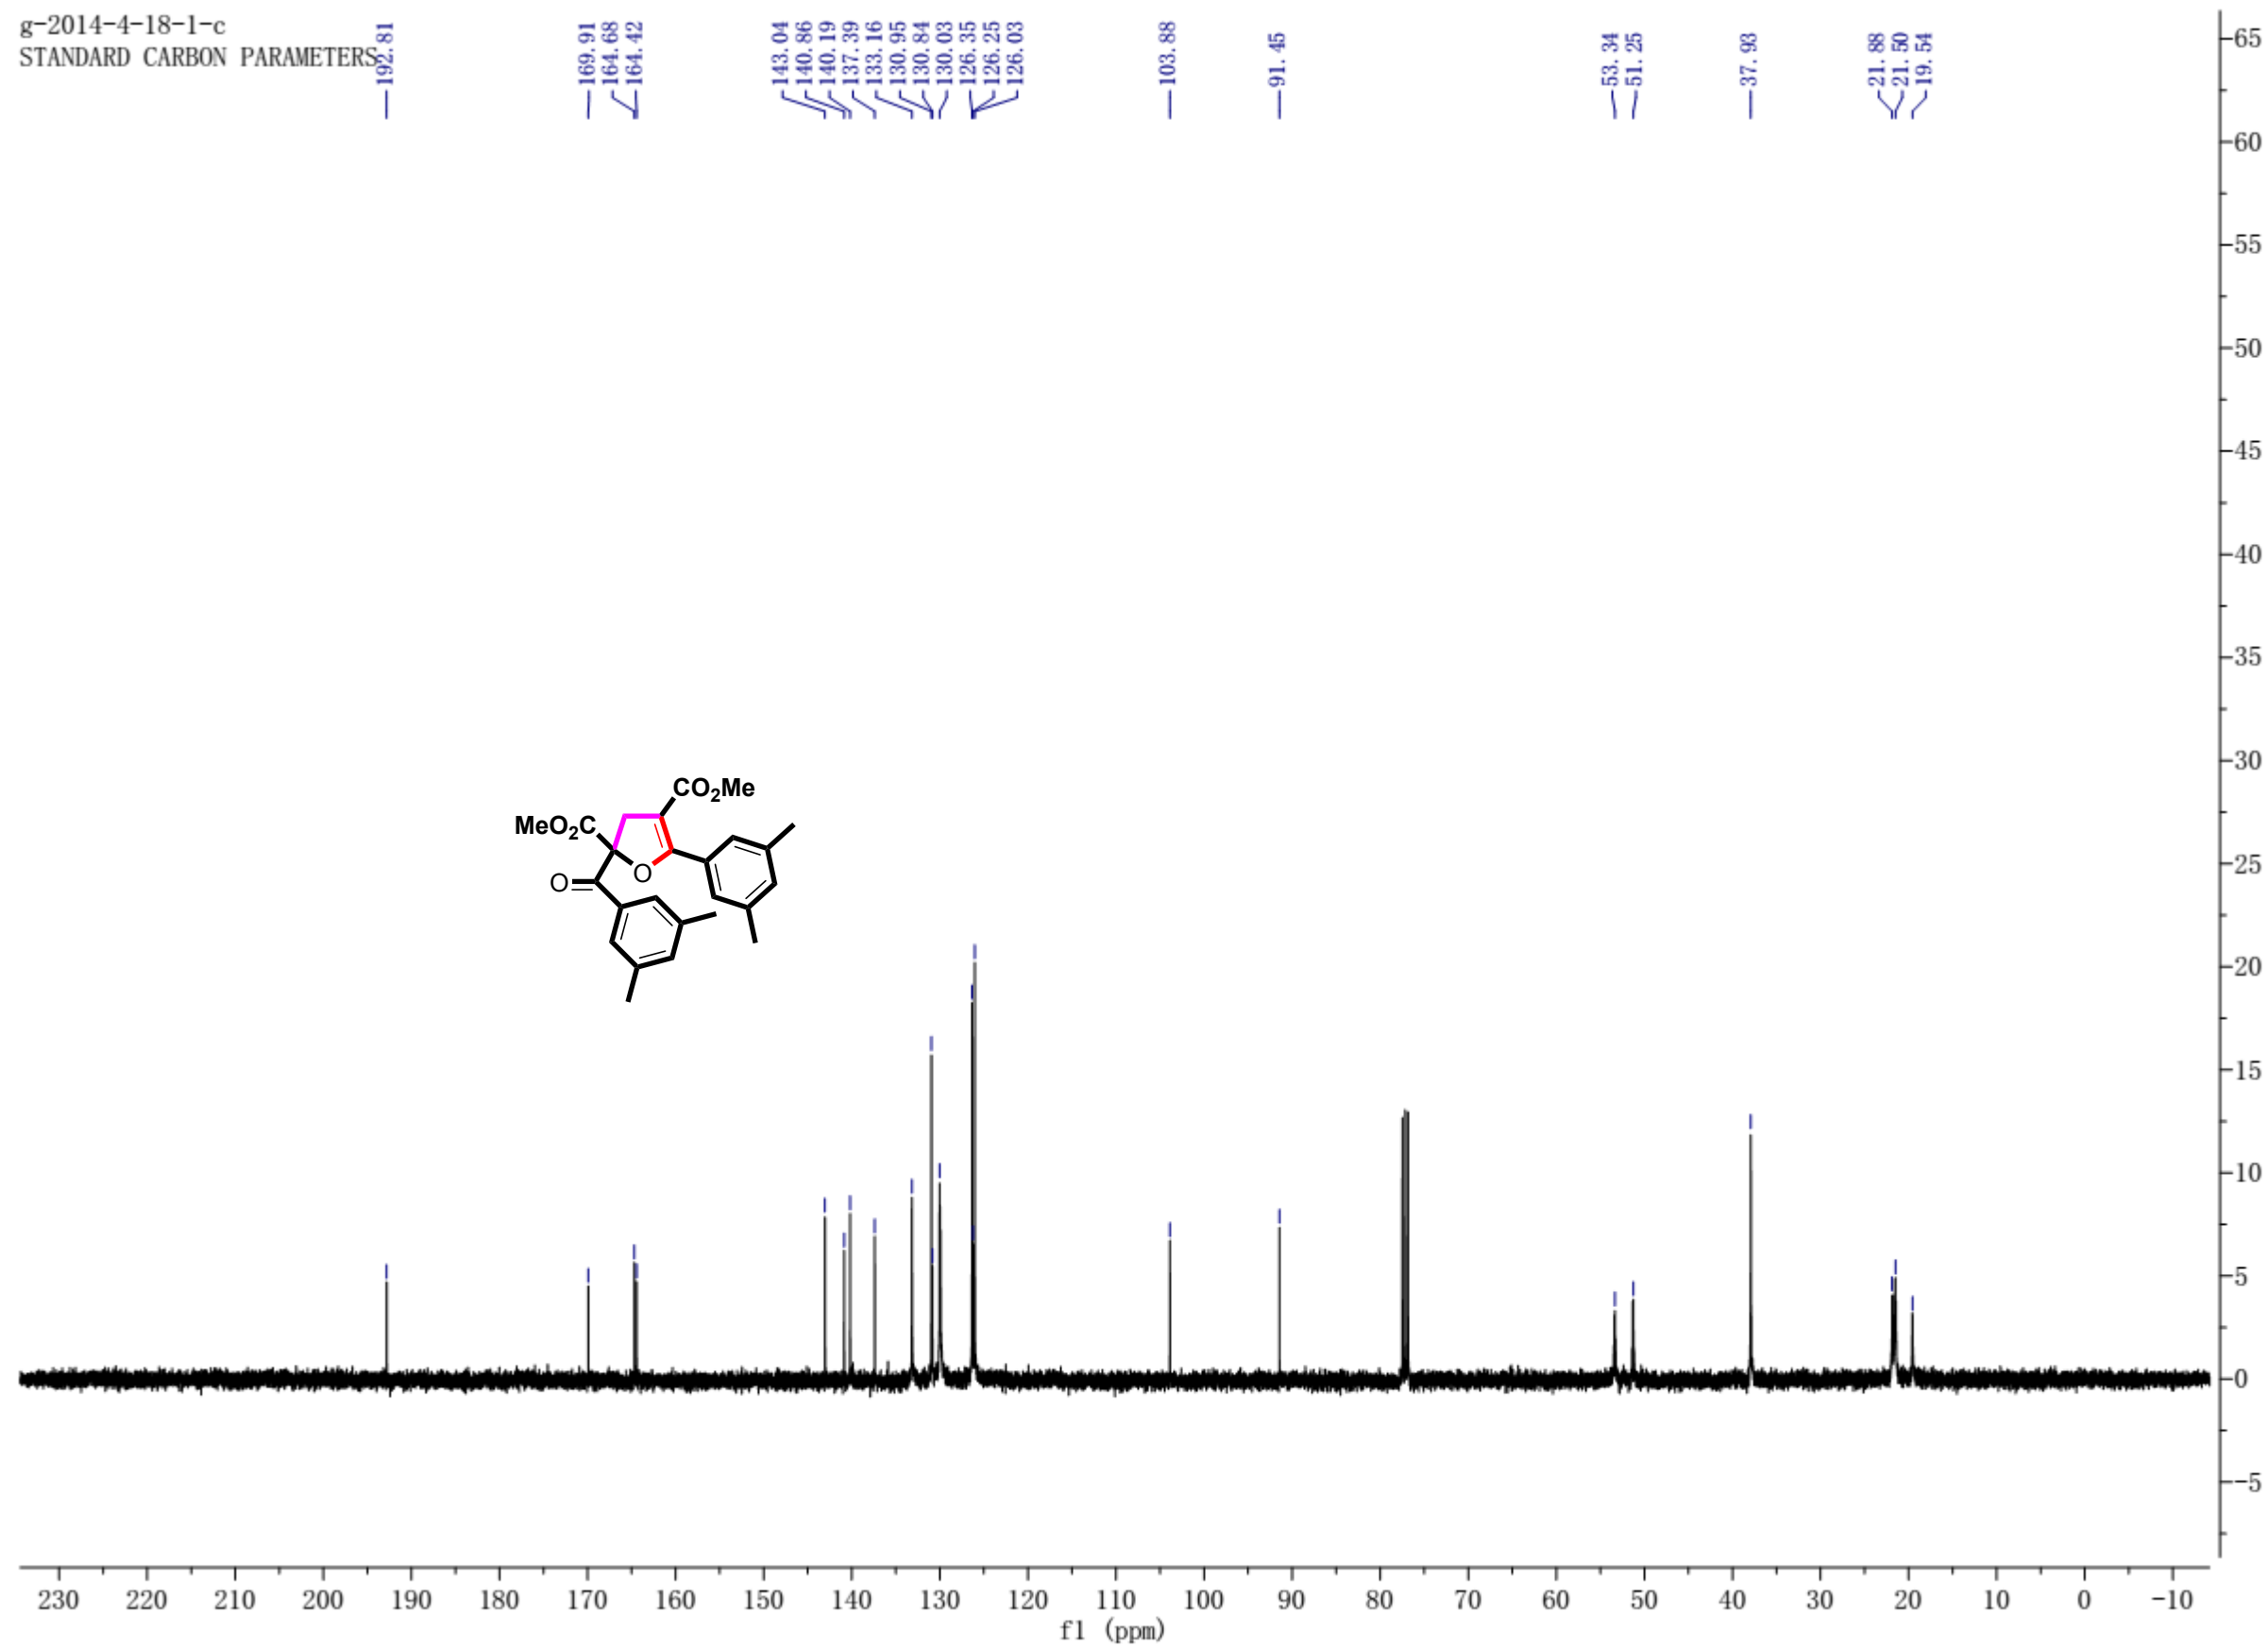

g-14-8-29-1-1H  
STANDARD PROTON PARAMETERS

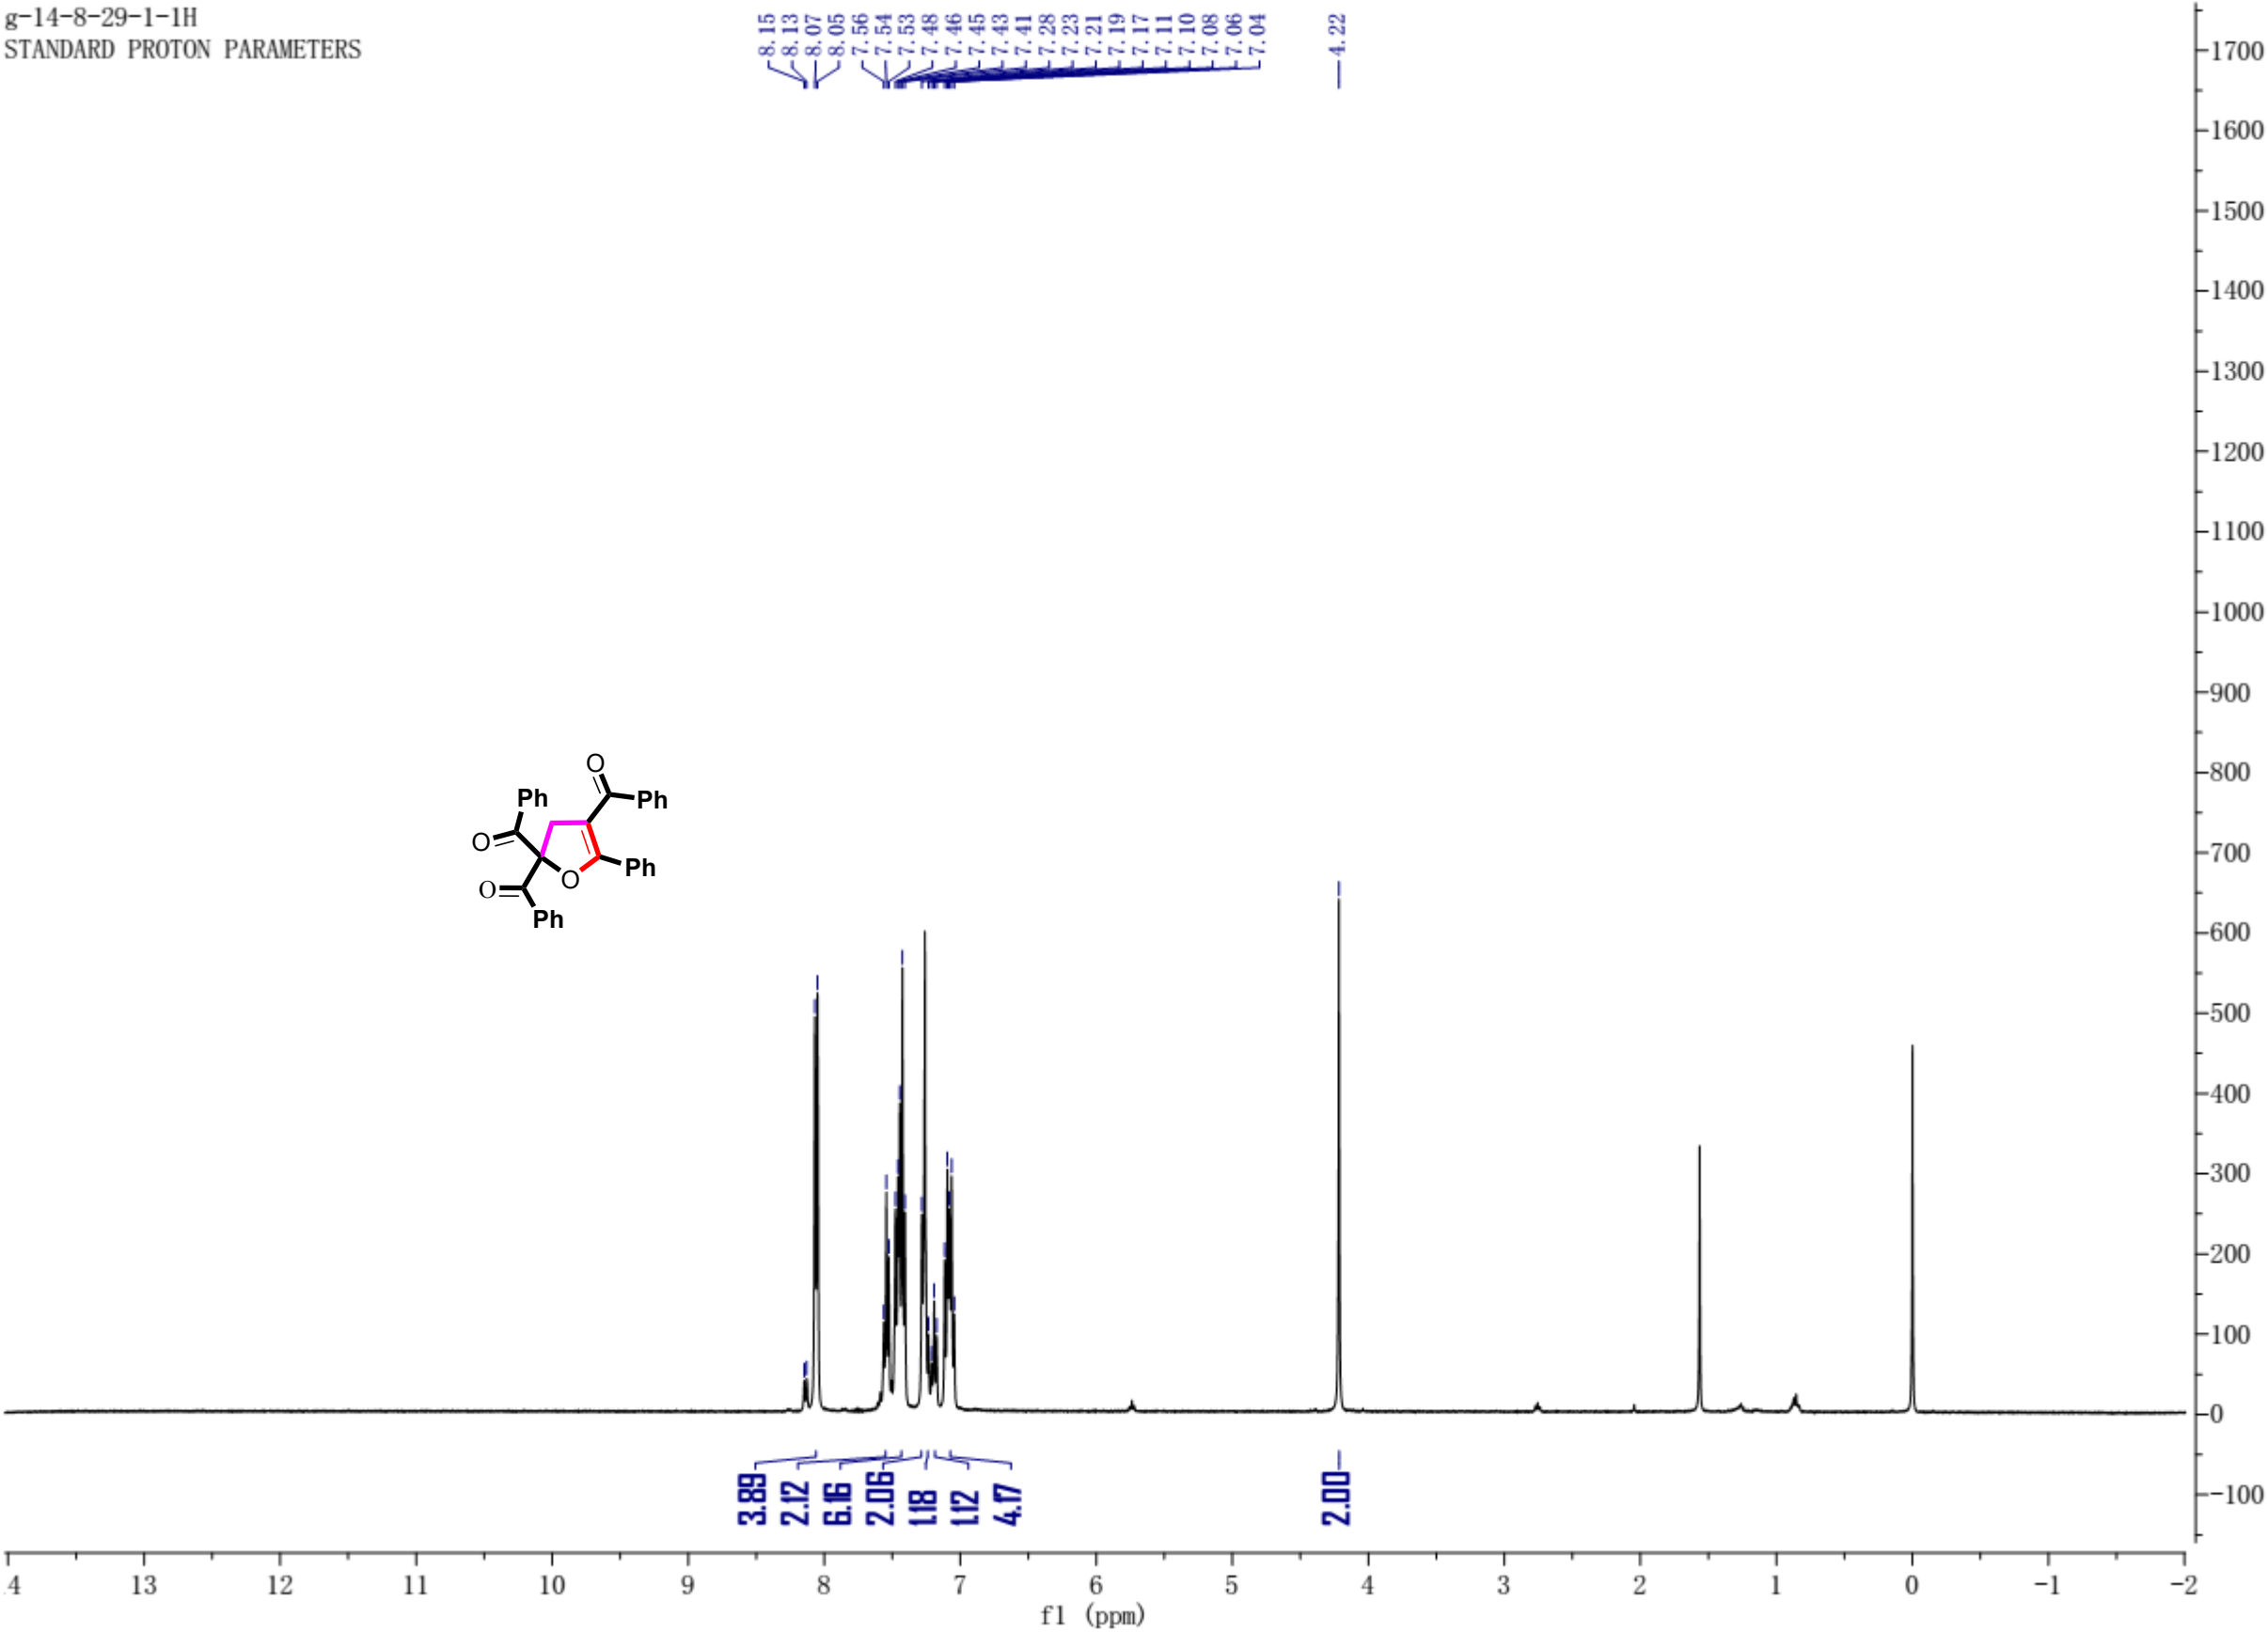

### STANDARD PROTON PARAMETERS

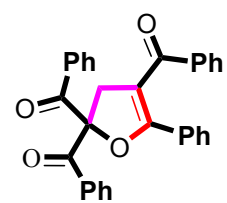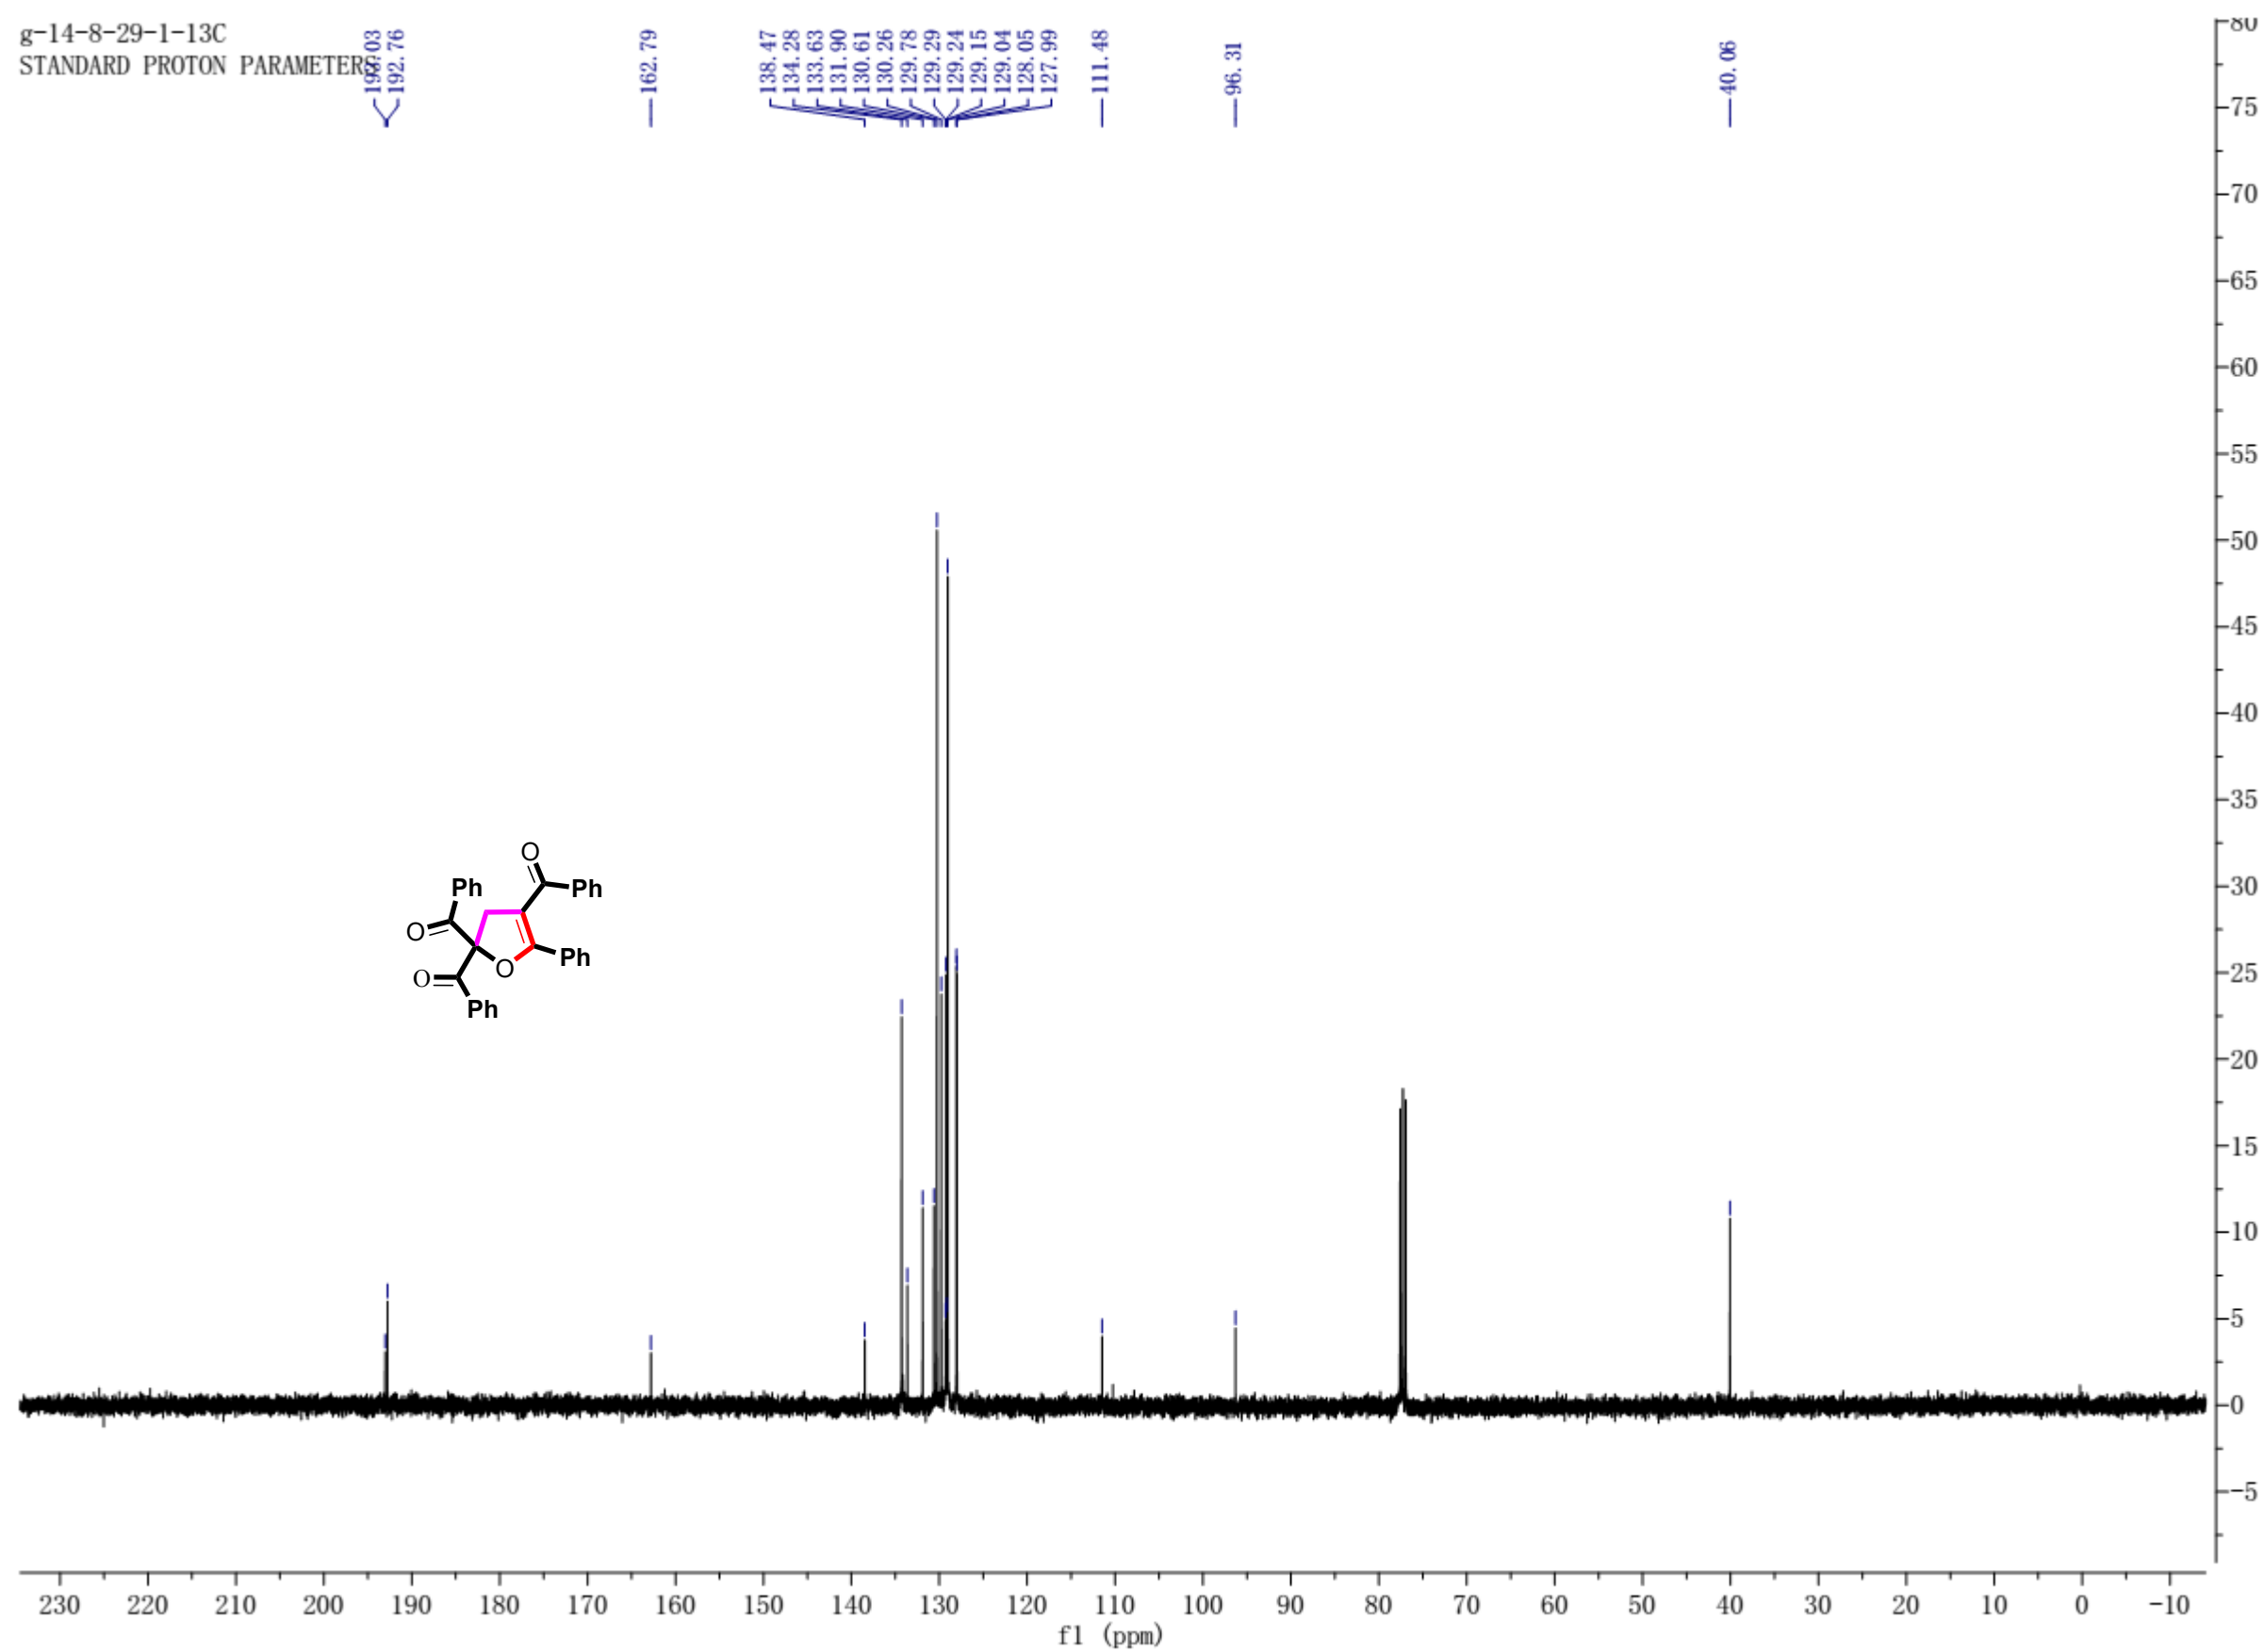



g-2014-4-18-13  
STANDARD CARBON PARAMETERS

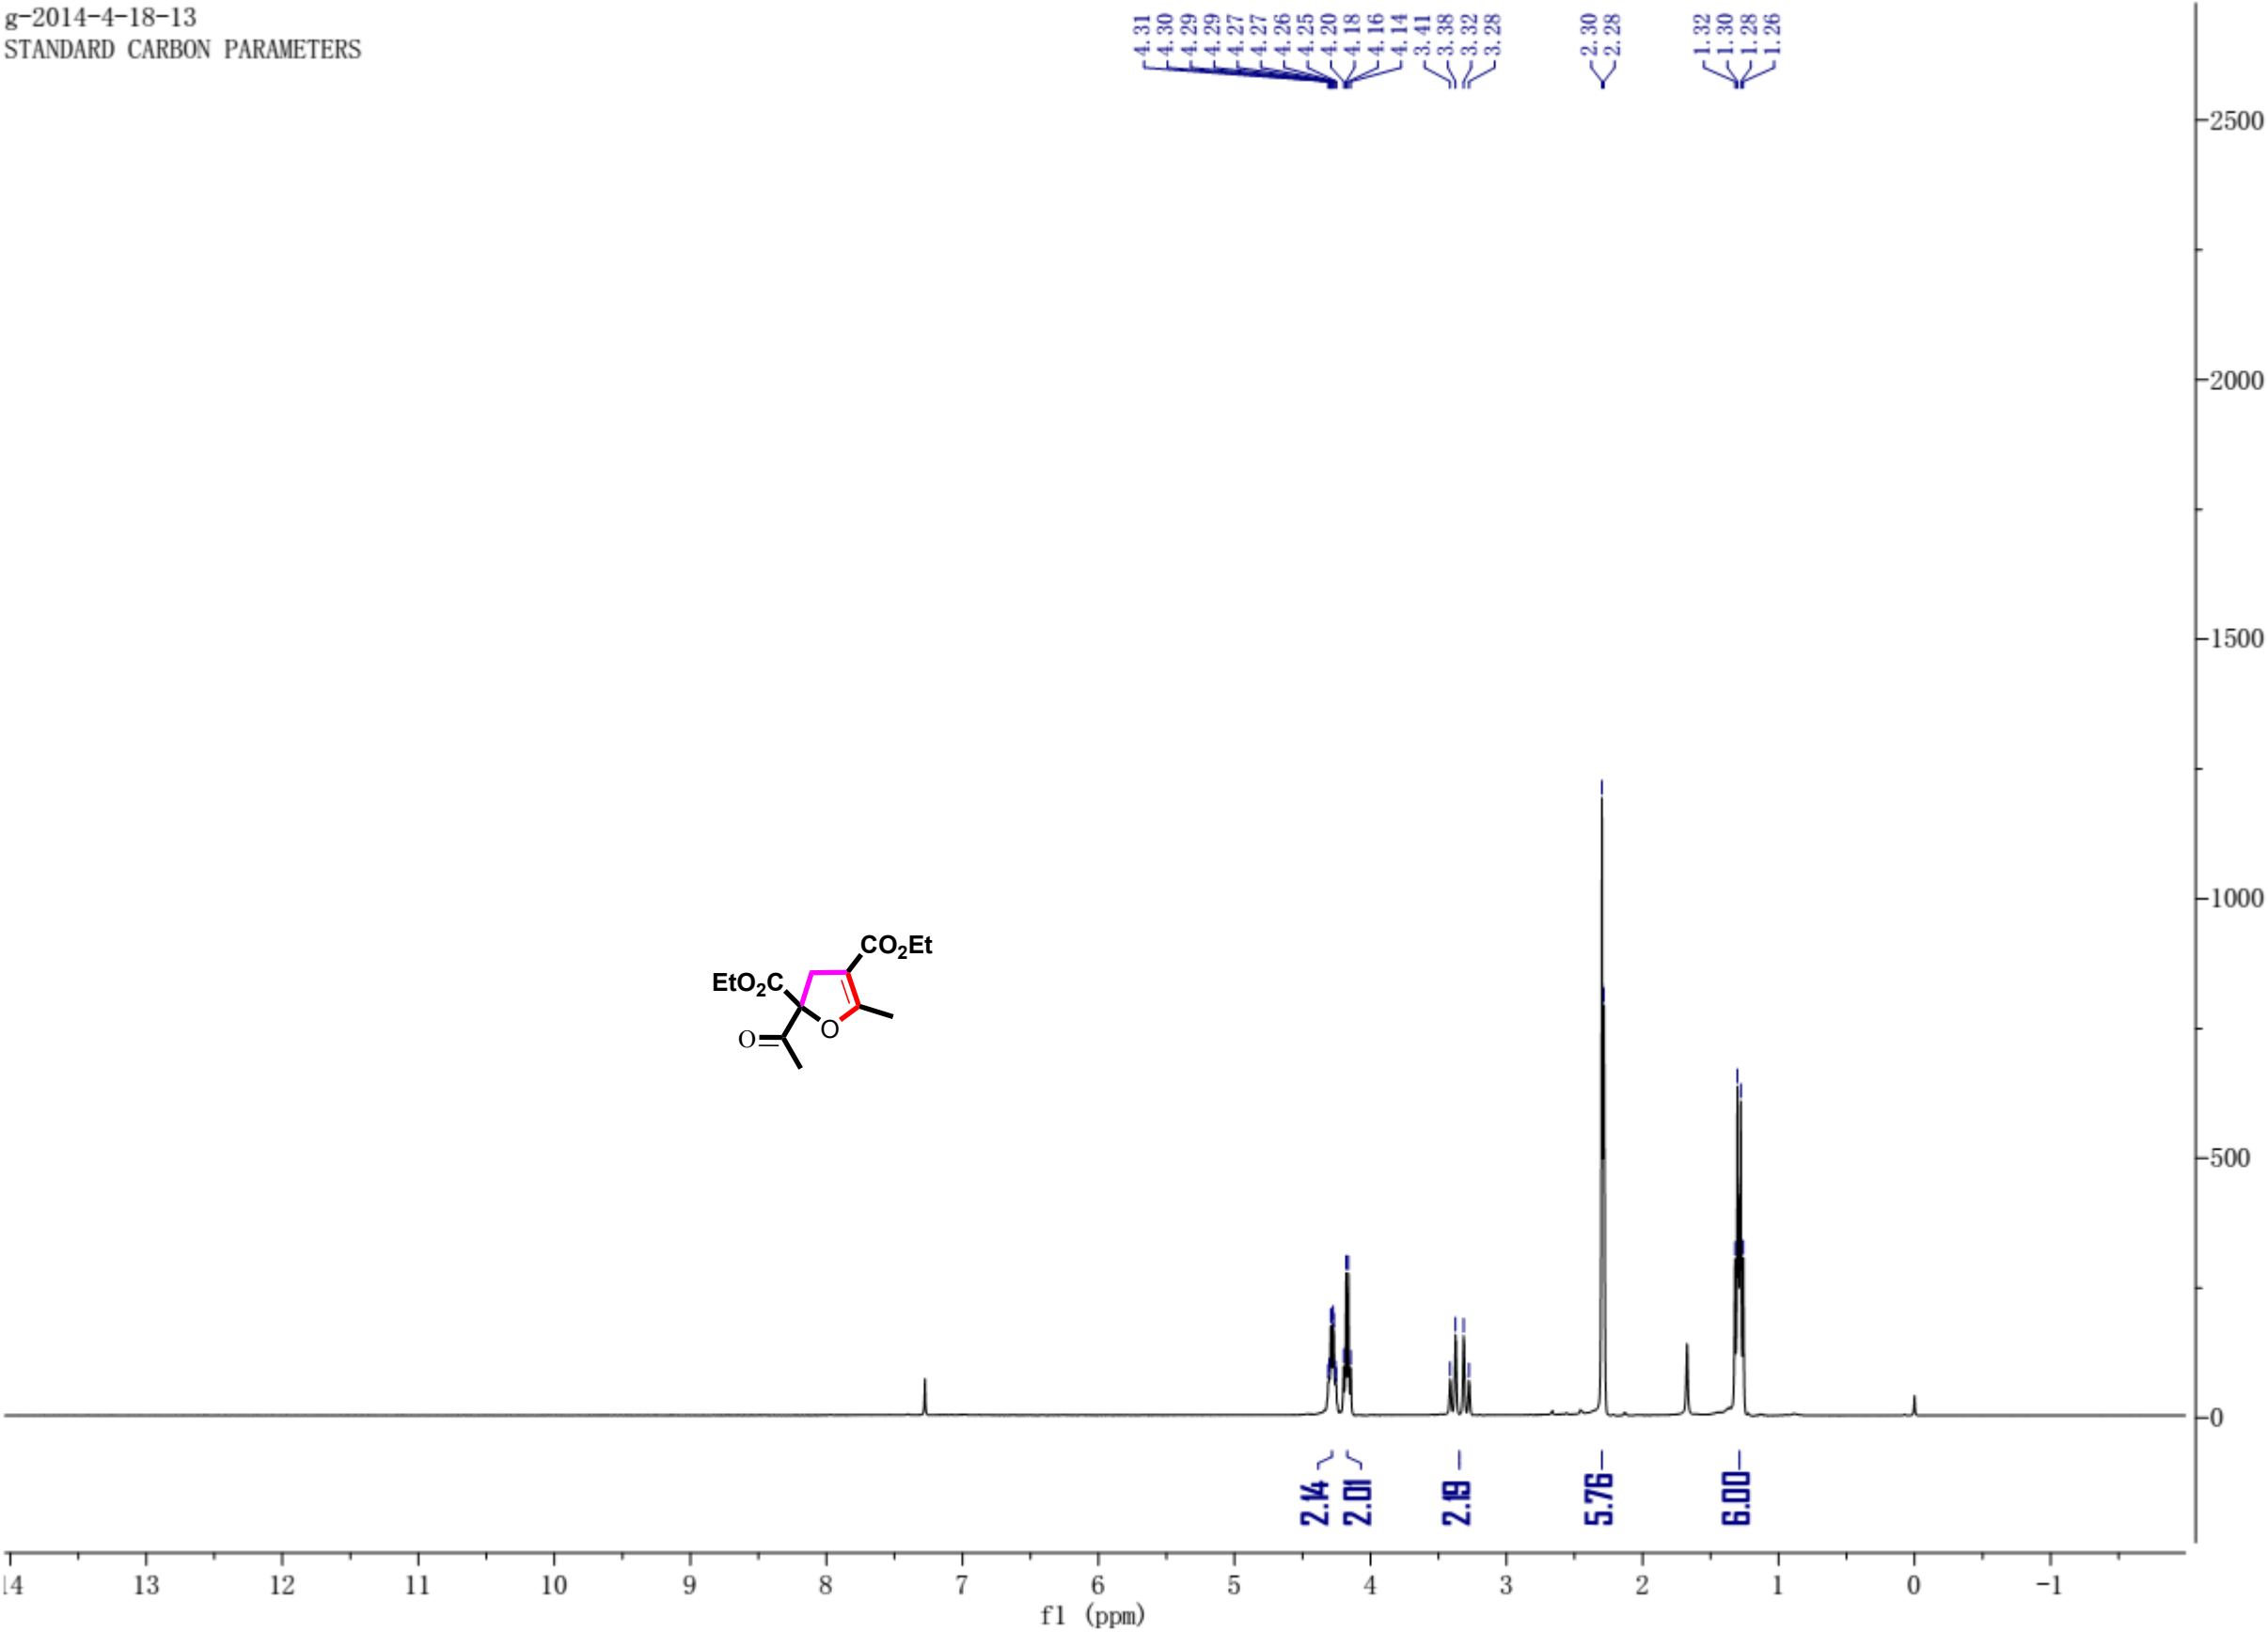

g-2014-4-18-13-c  
STANDARD CARBON PARAMETERS

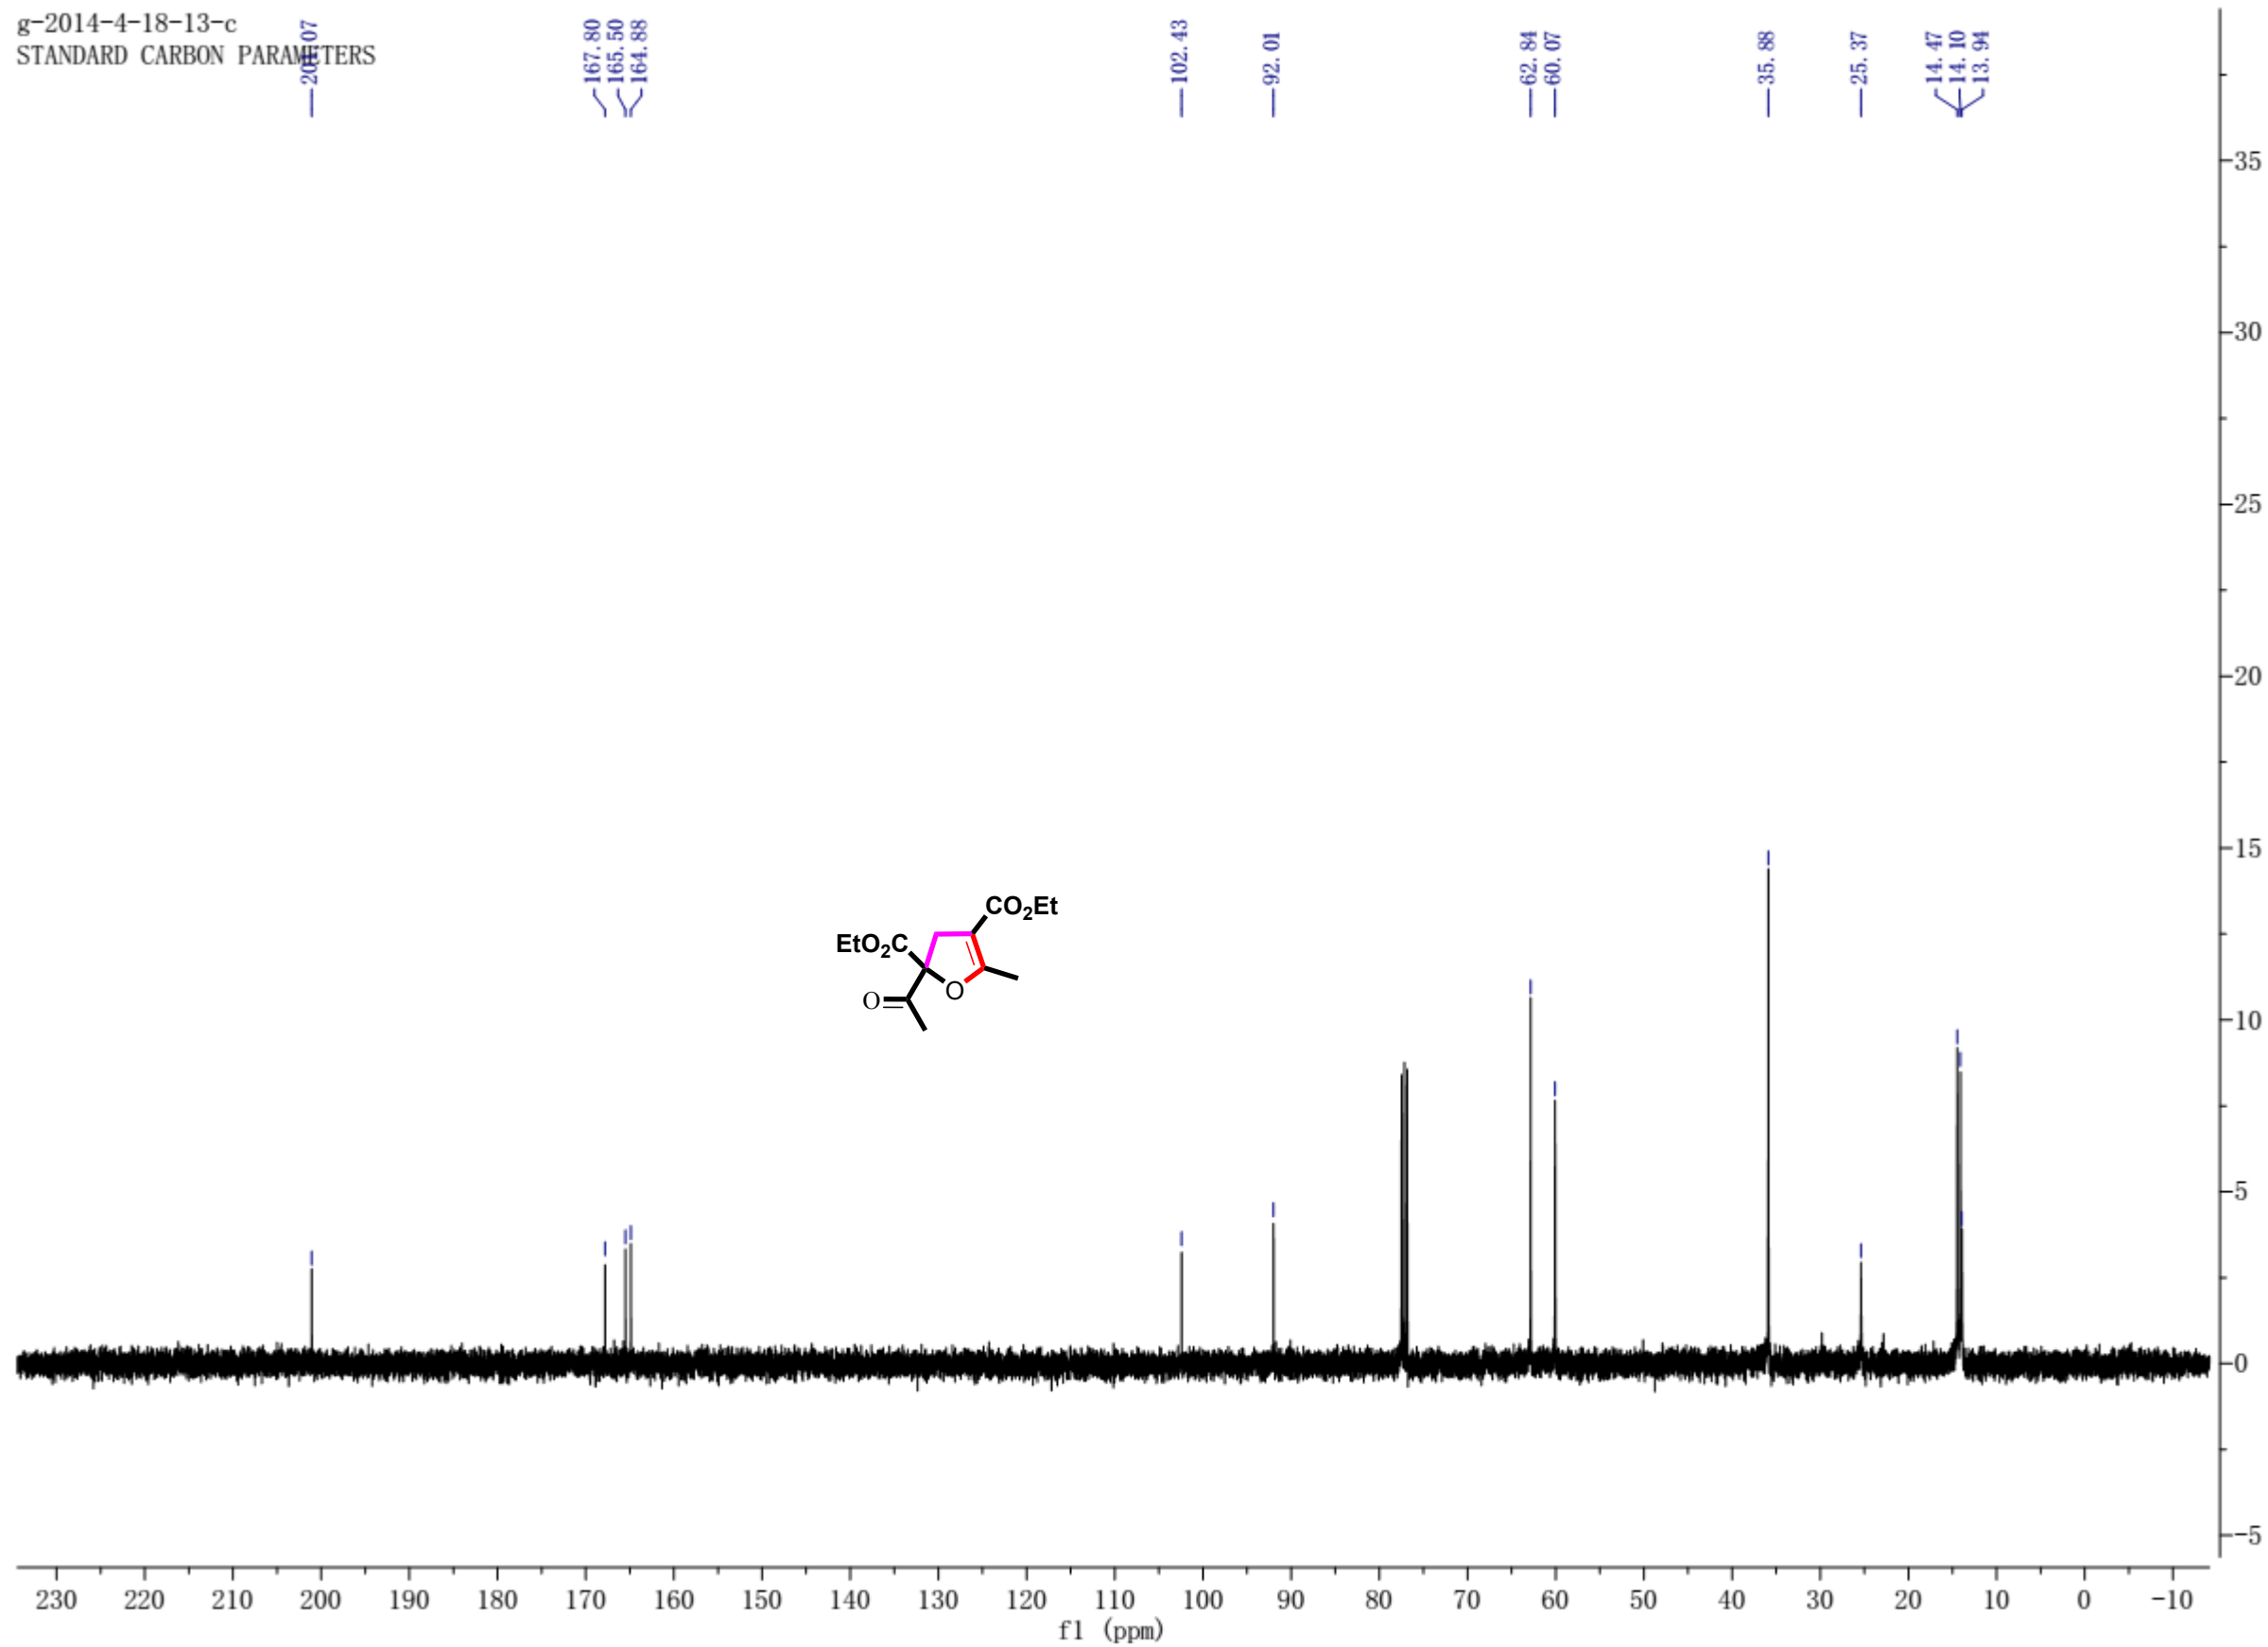

g-14-4-25-9  
STANDARD CARBON PARAMETERS

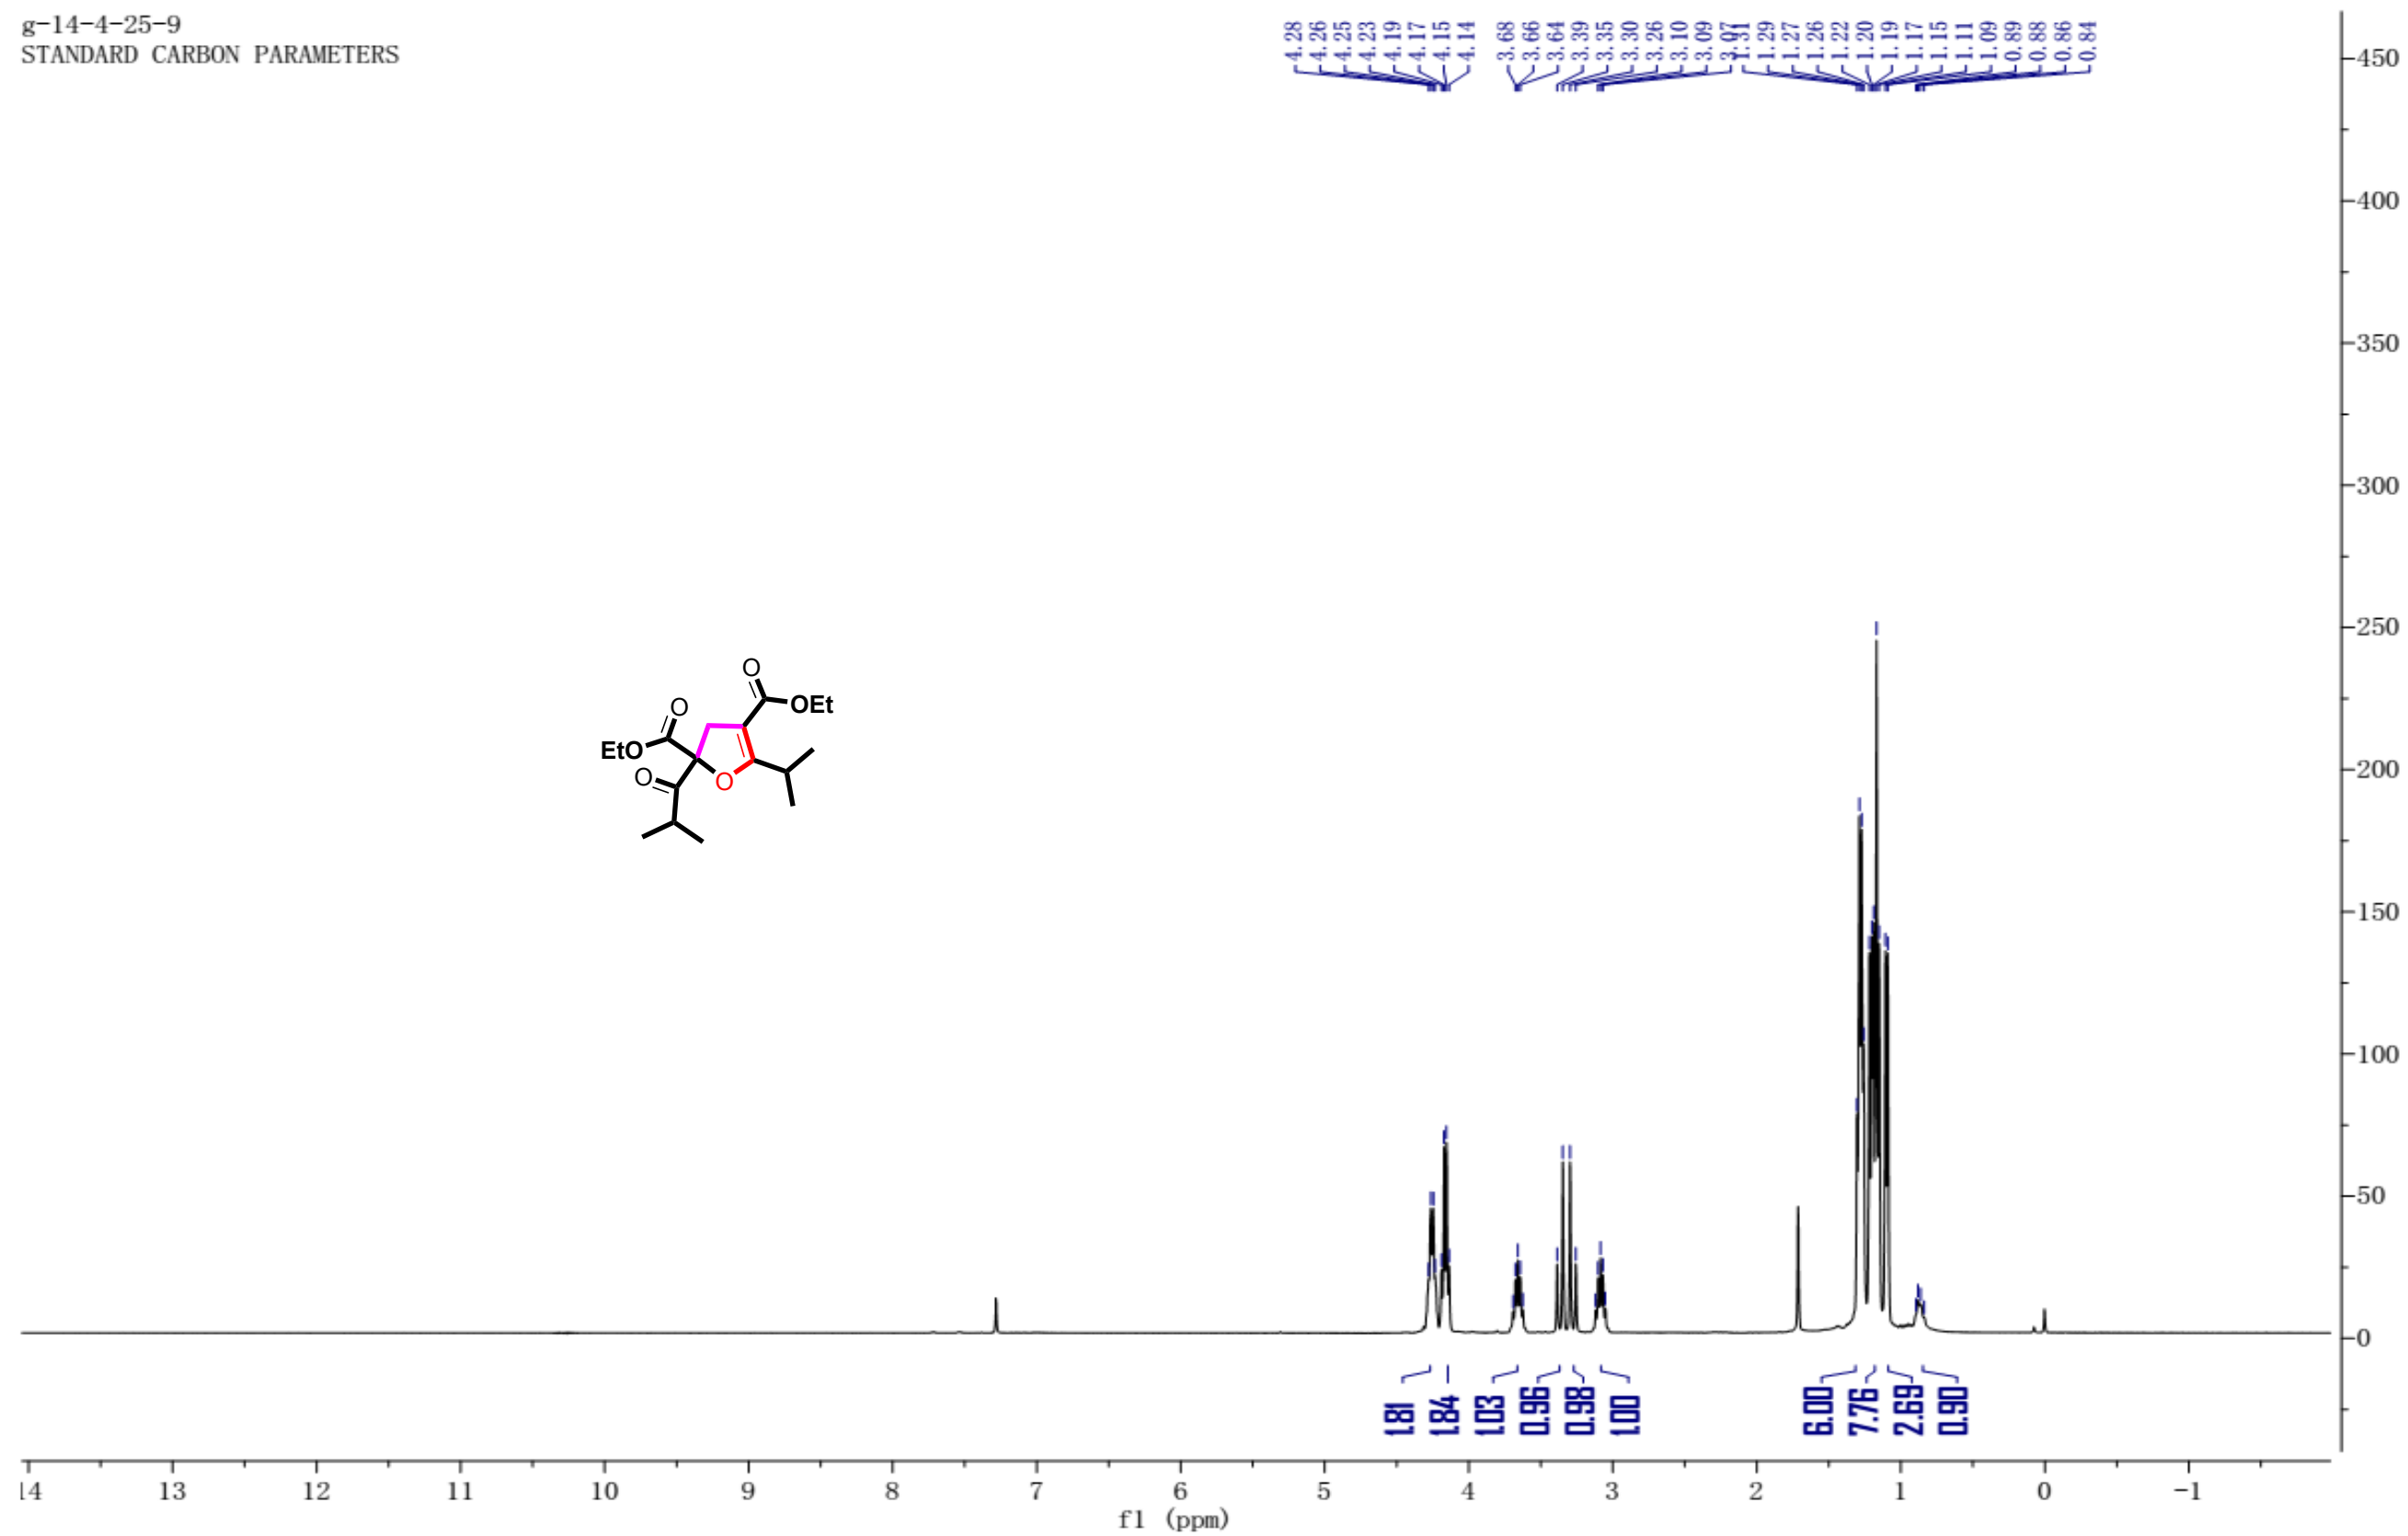

LULIN-13C-1  
Gradient Shimmin

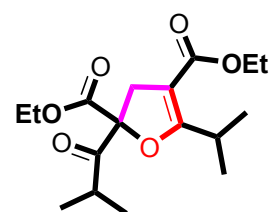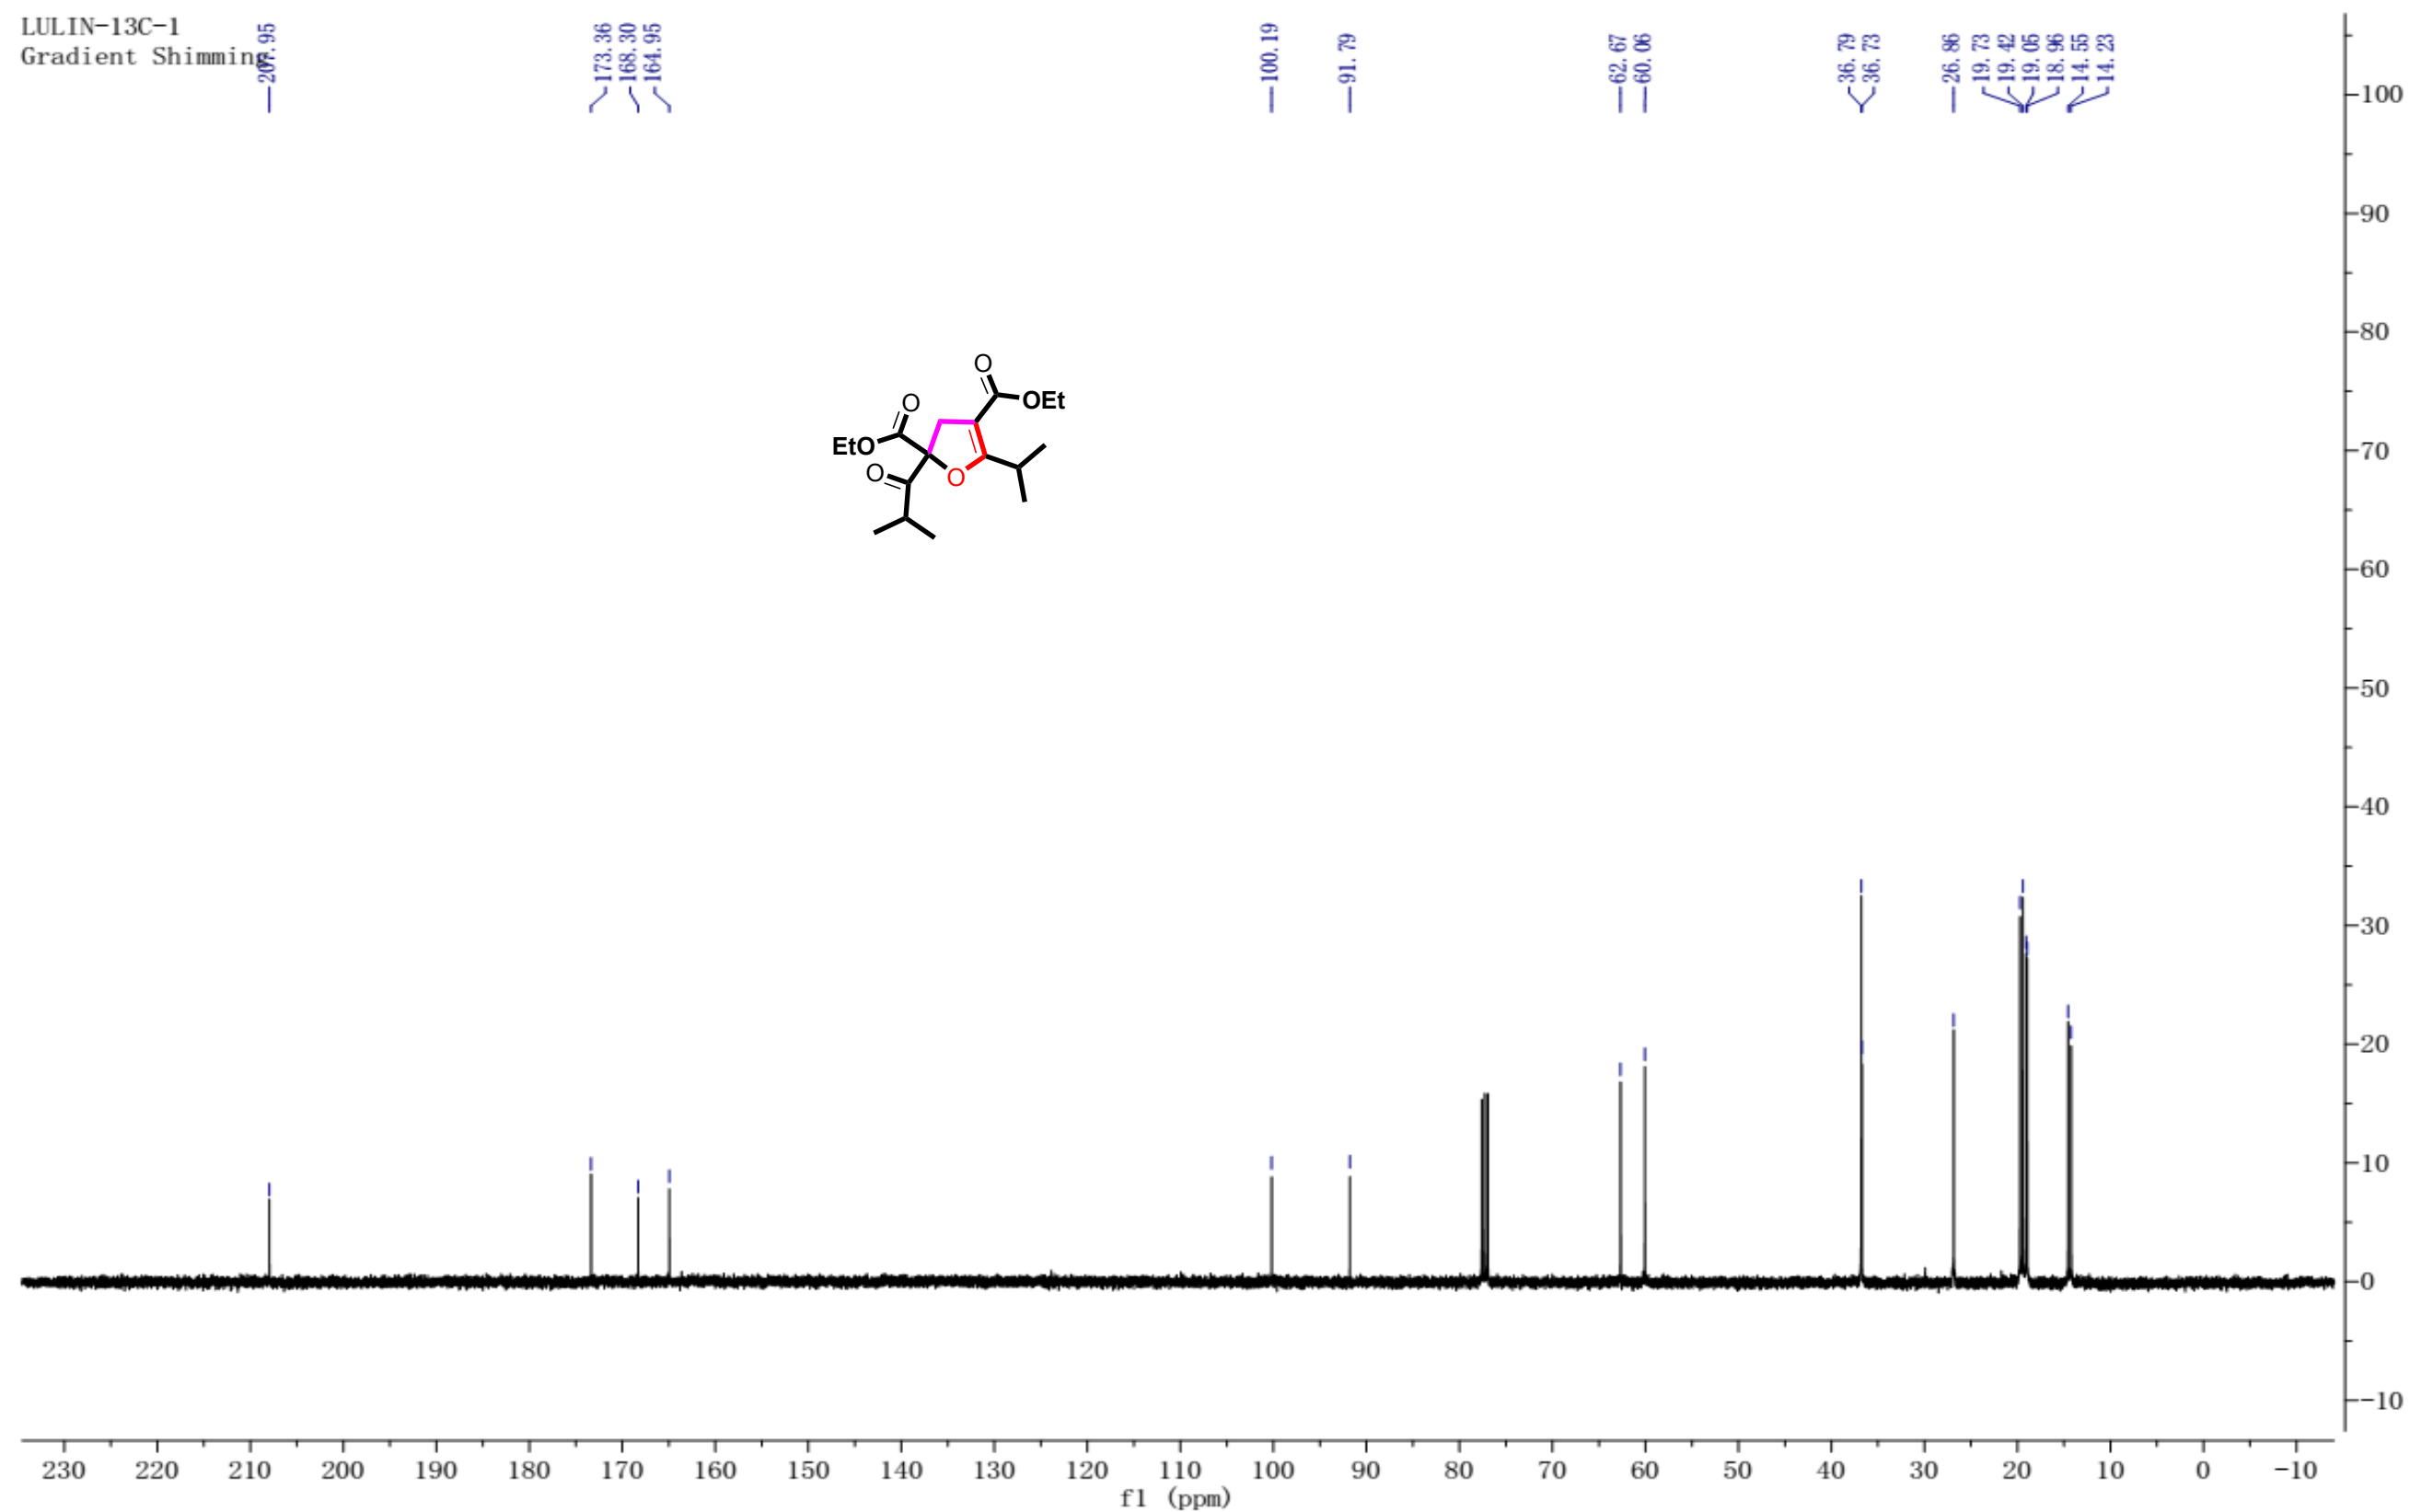

g-2014-4-26-1  
STANDARD CARBON PARAMETERS

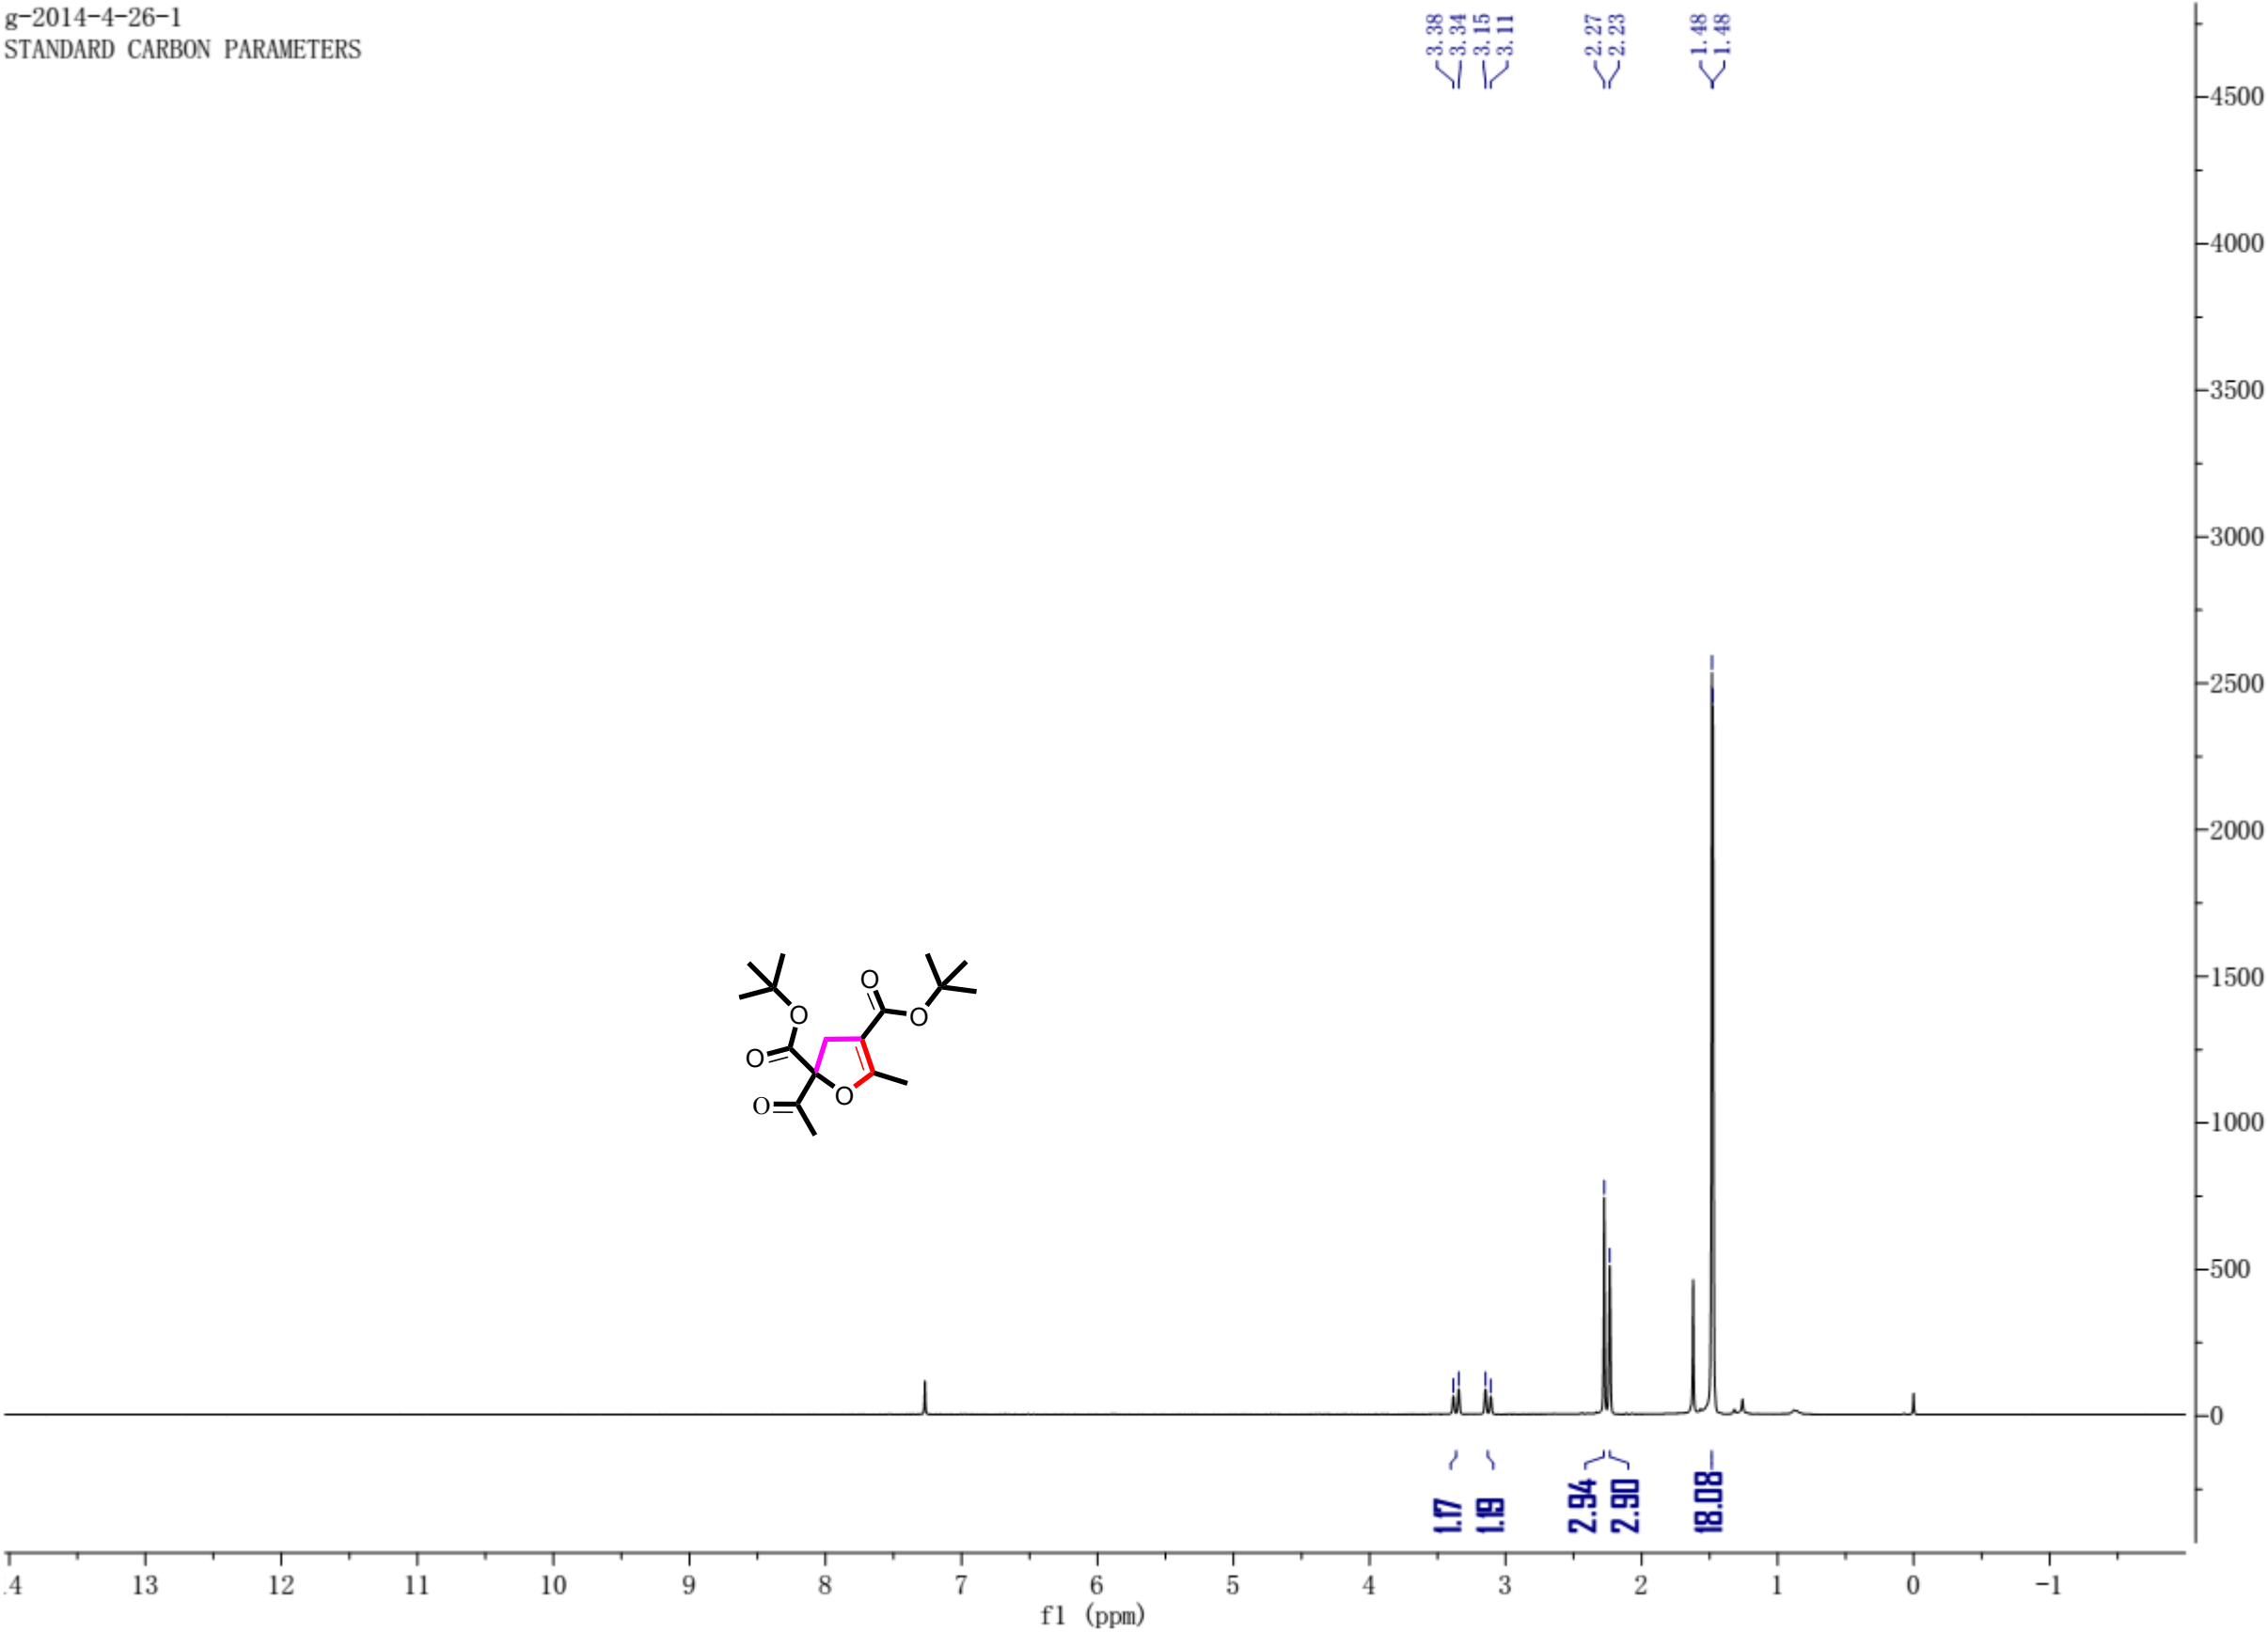

g-2014-4-26-1-c  
STANDARD CARBON PARAMETERS

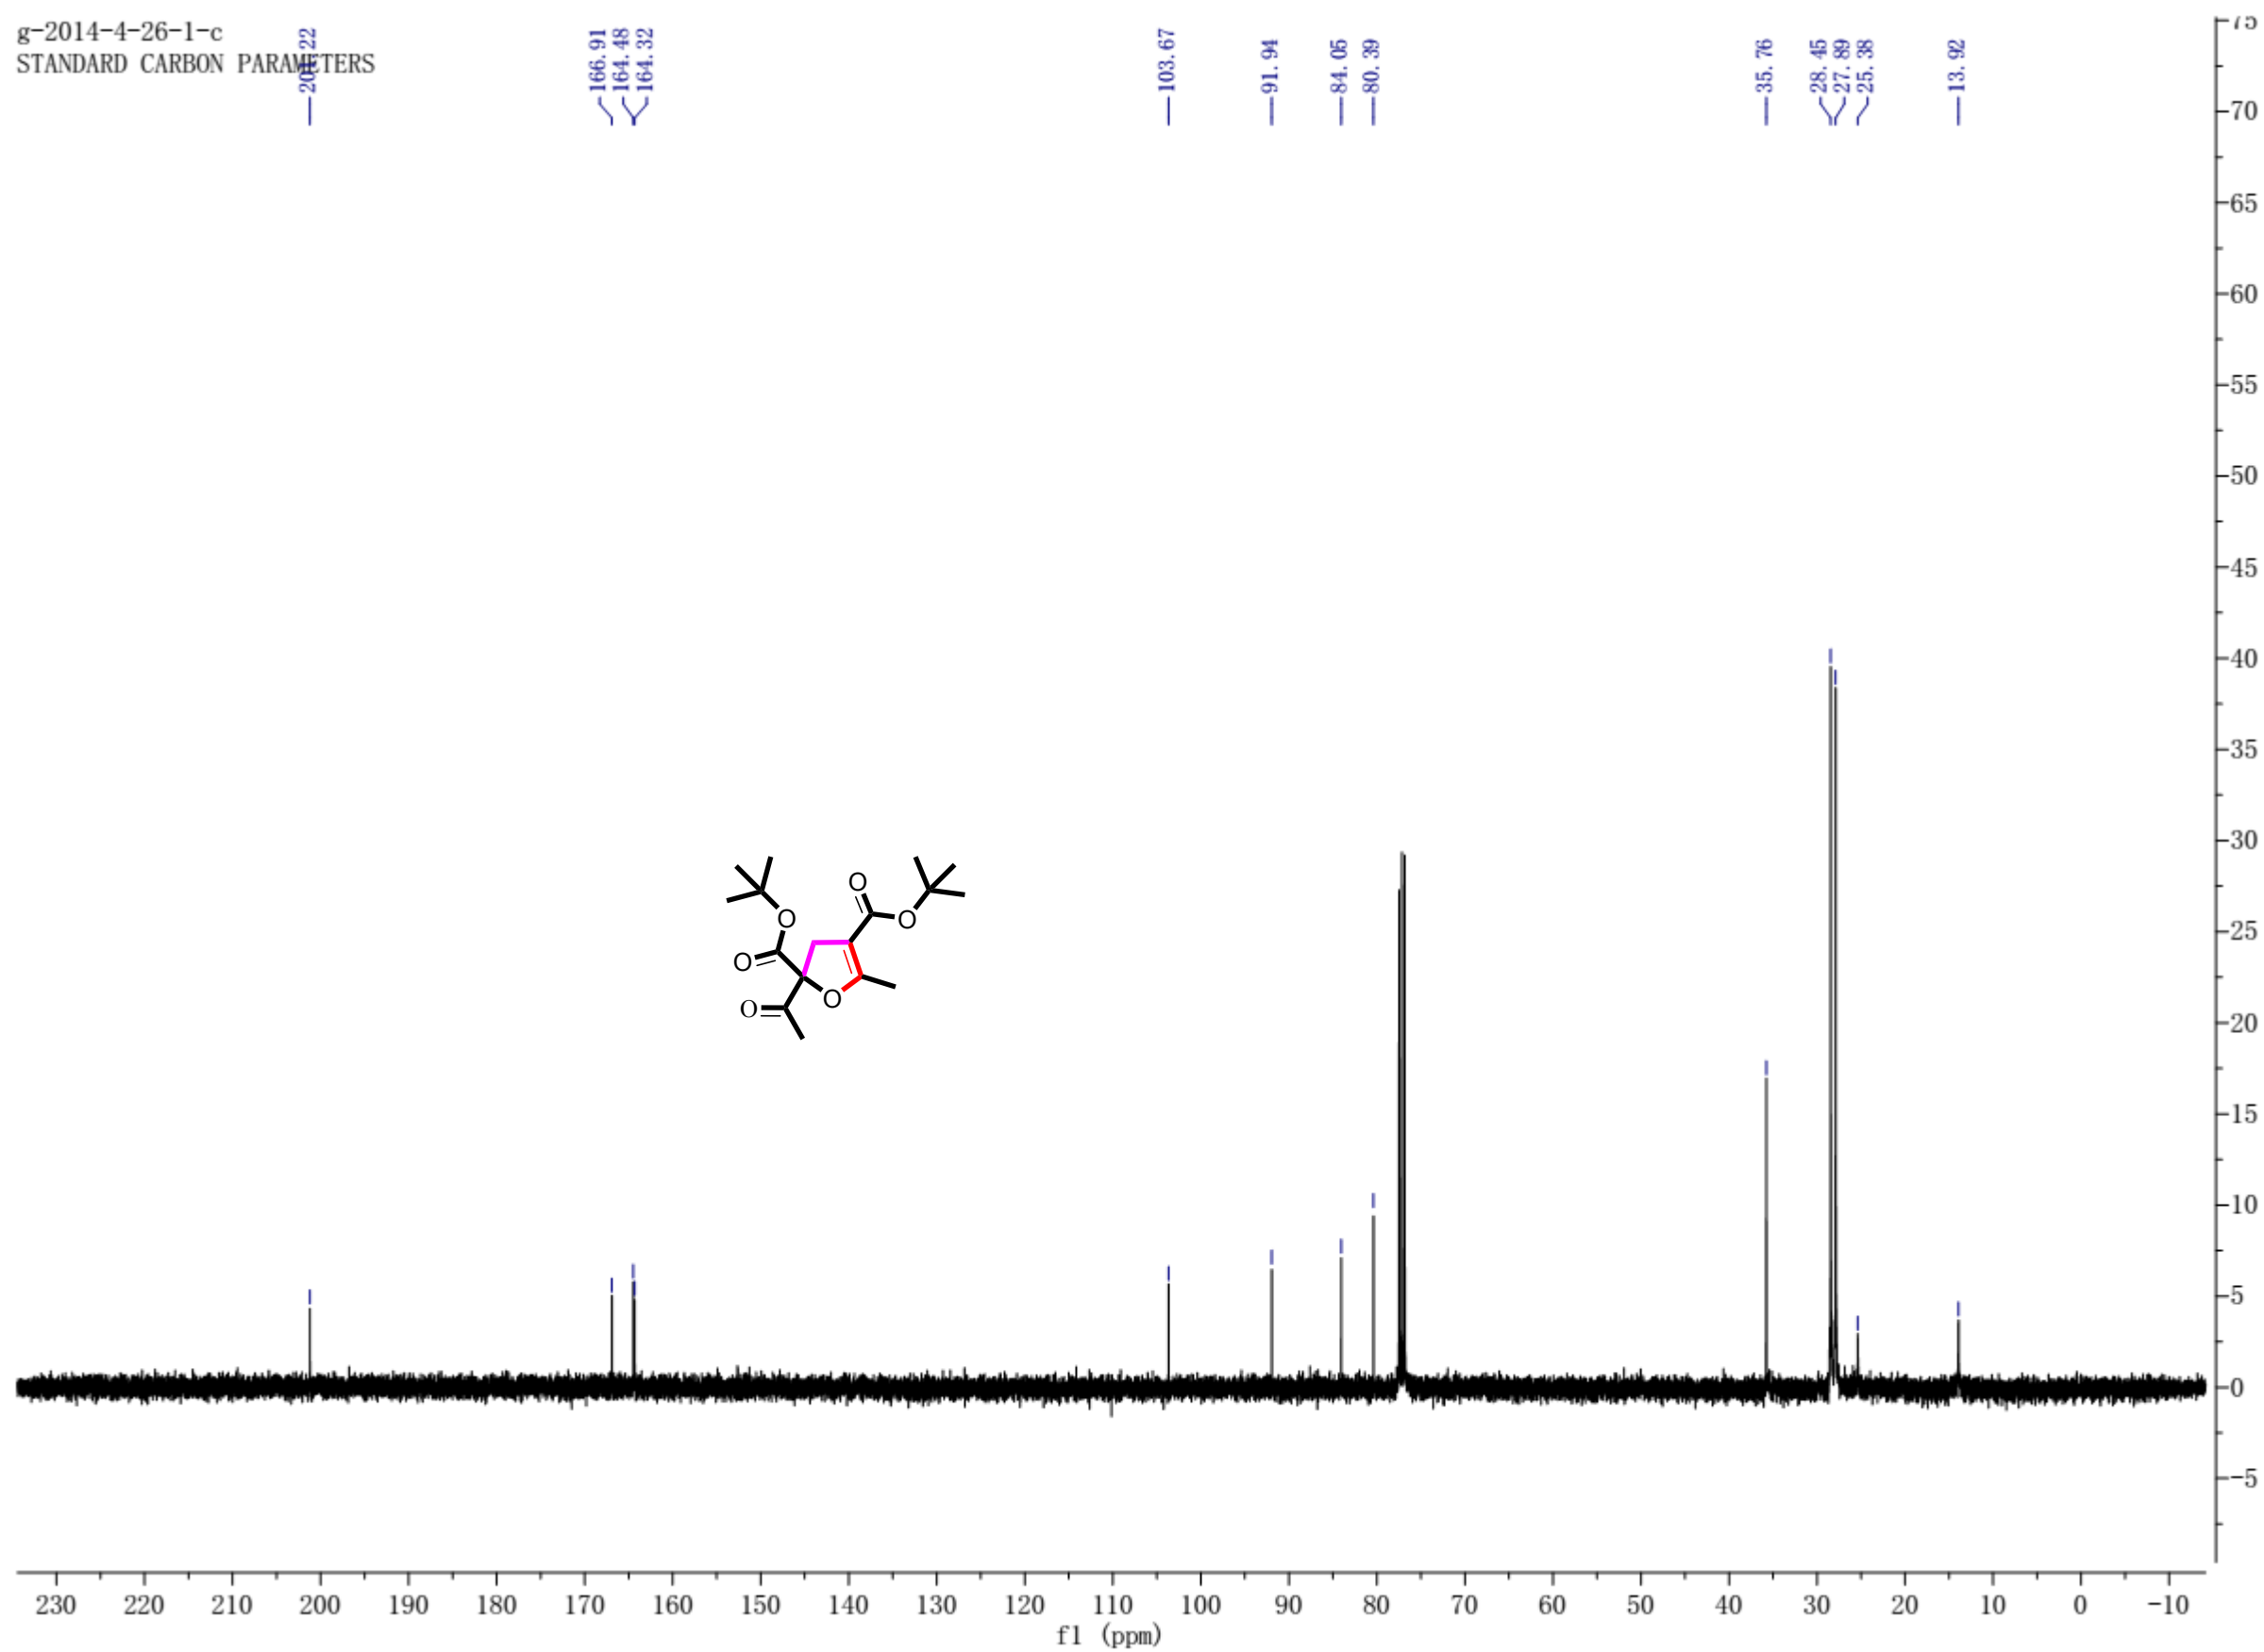

g-2014-4-26-2  
STANDARD CARBON PARAMETERS

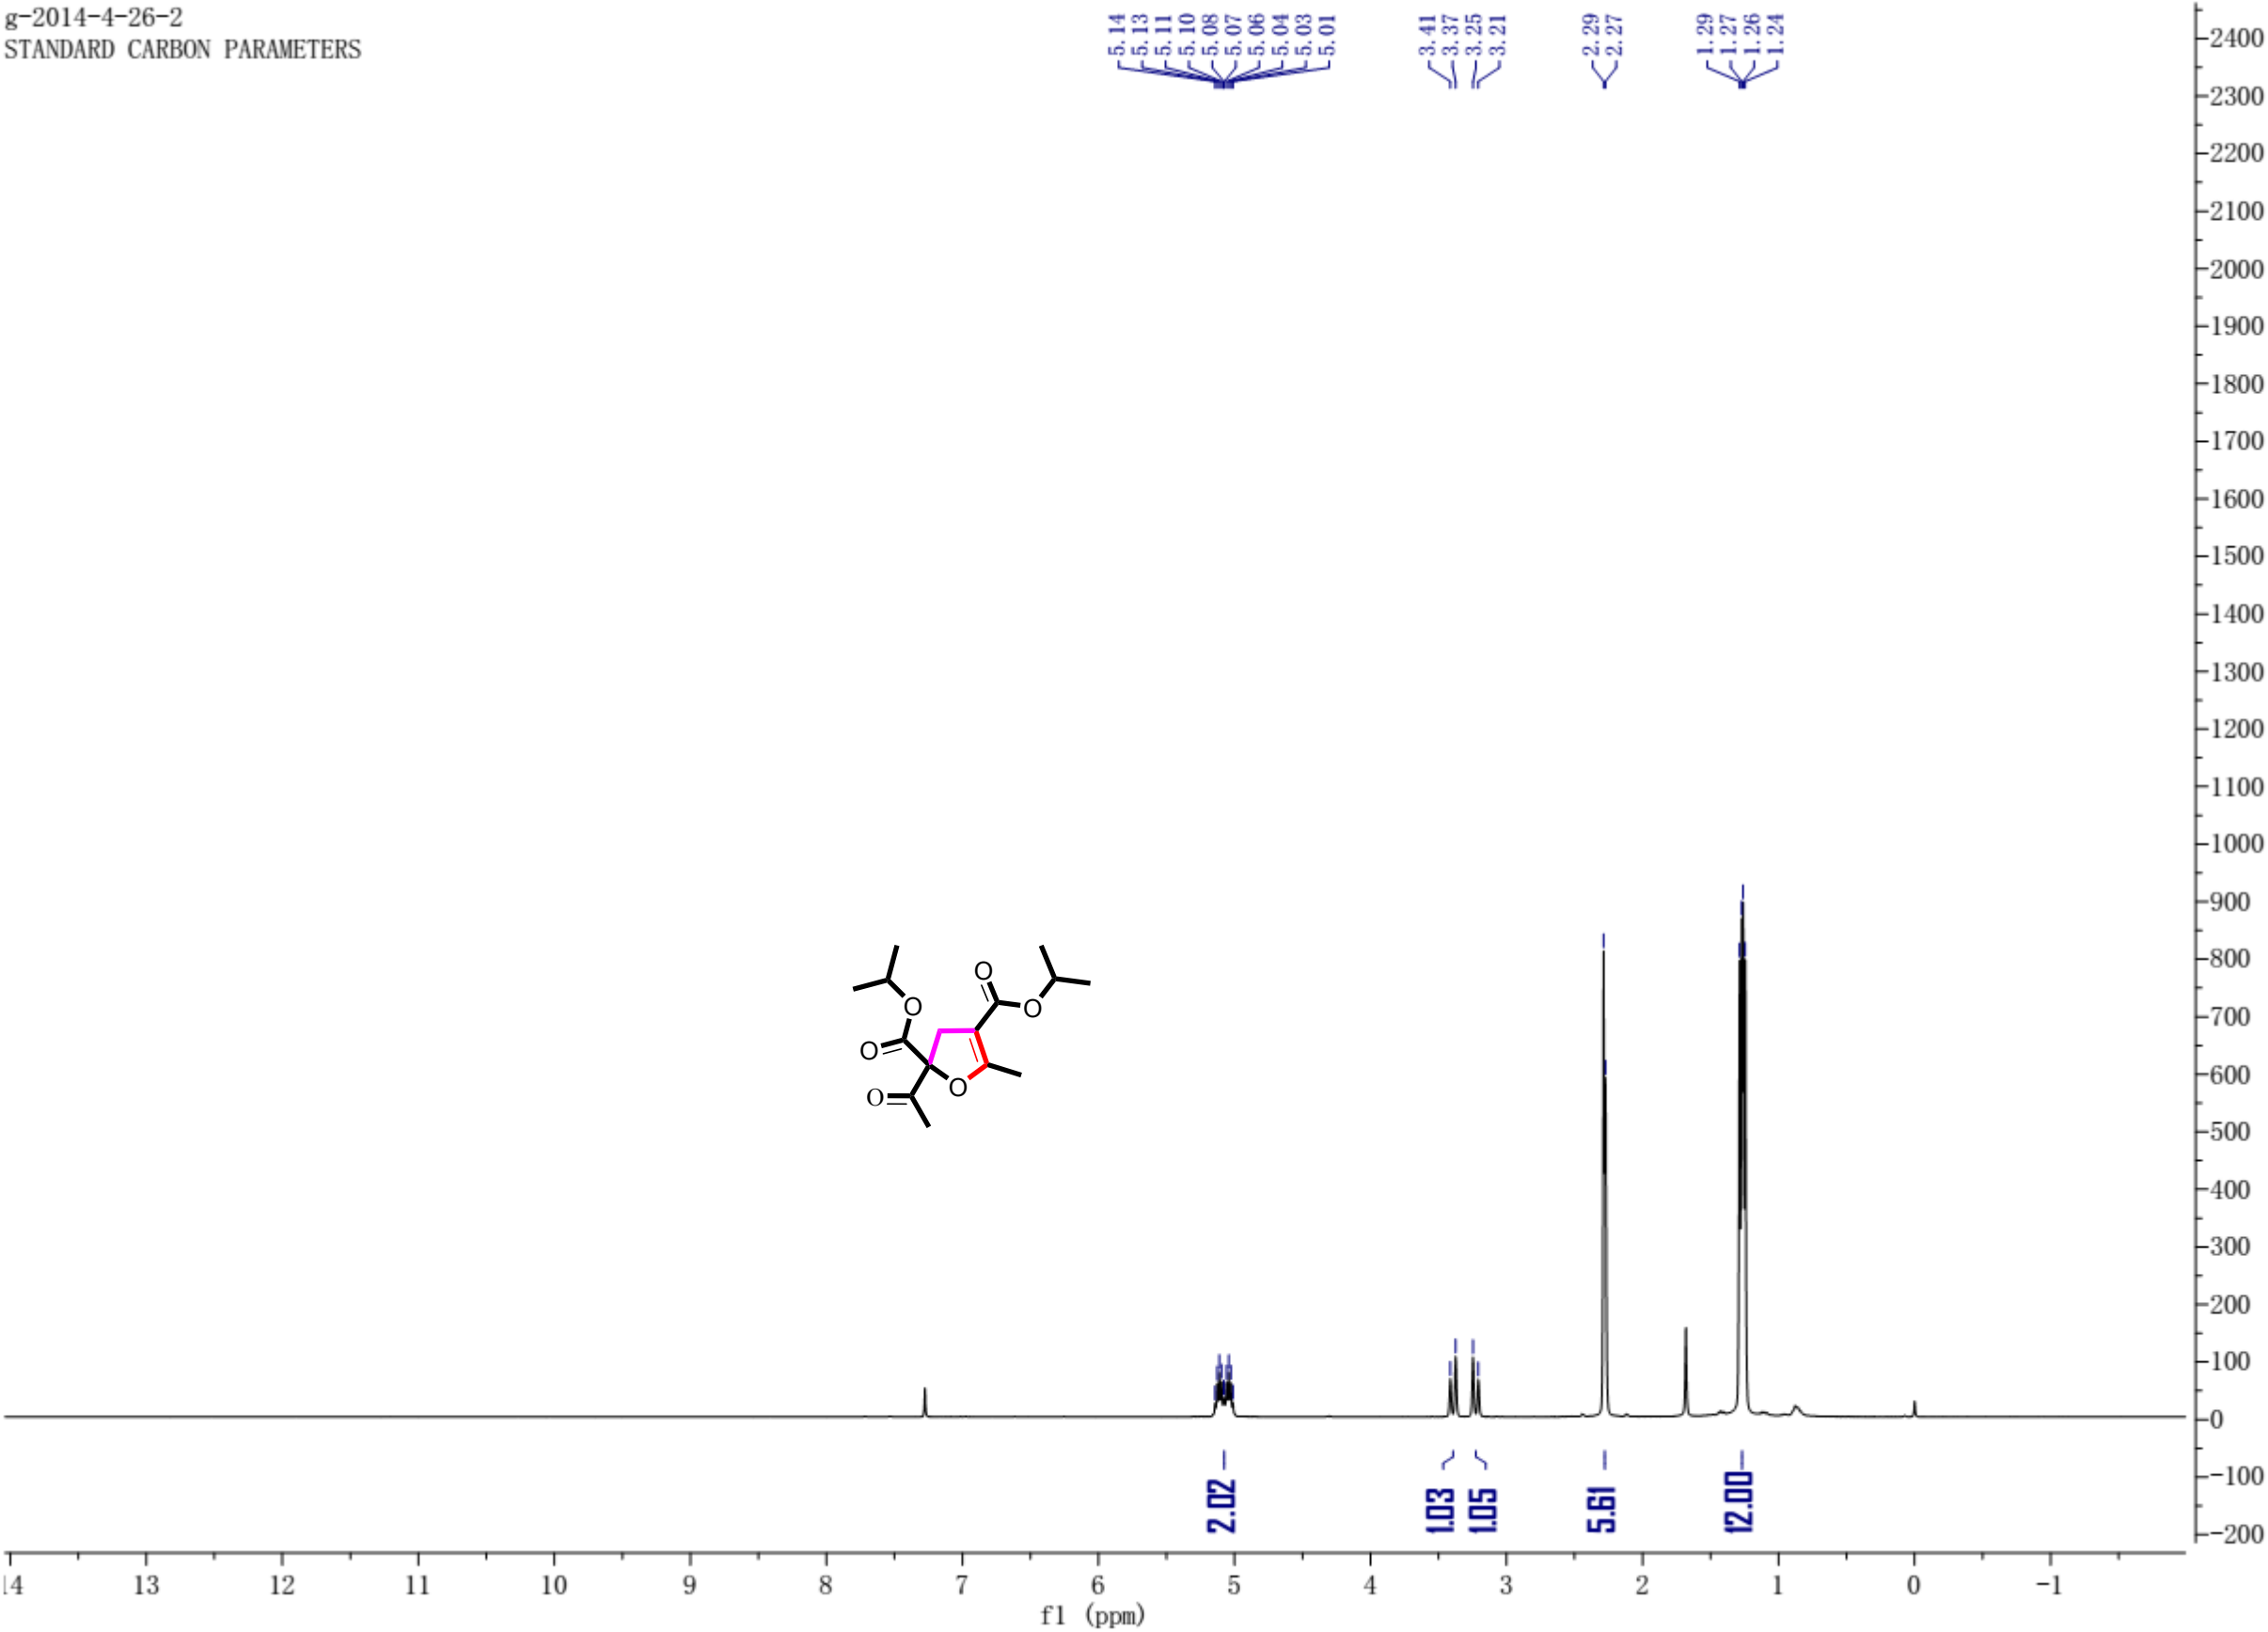

g-2014-4-26-2-c  
STANDARD CARBON PARAMETERS

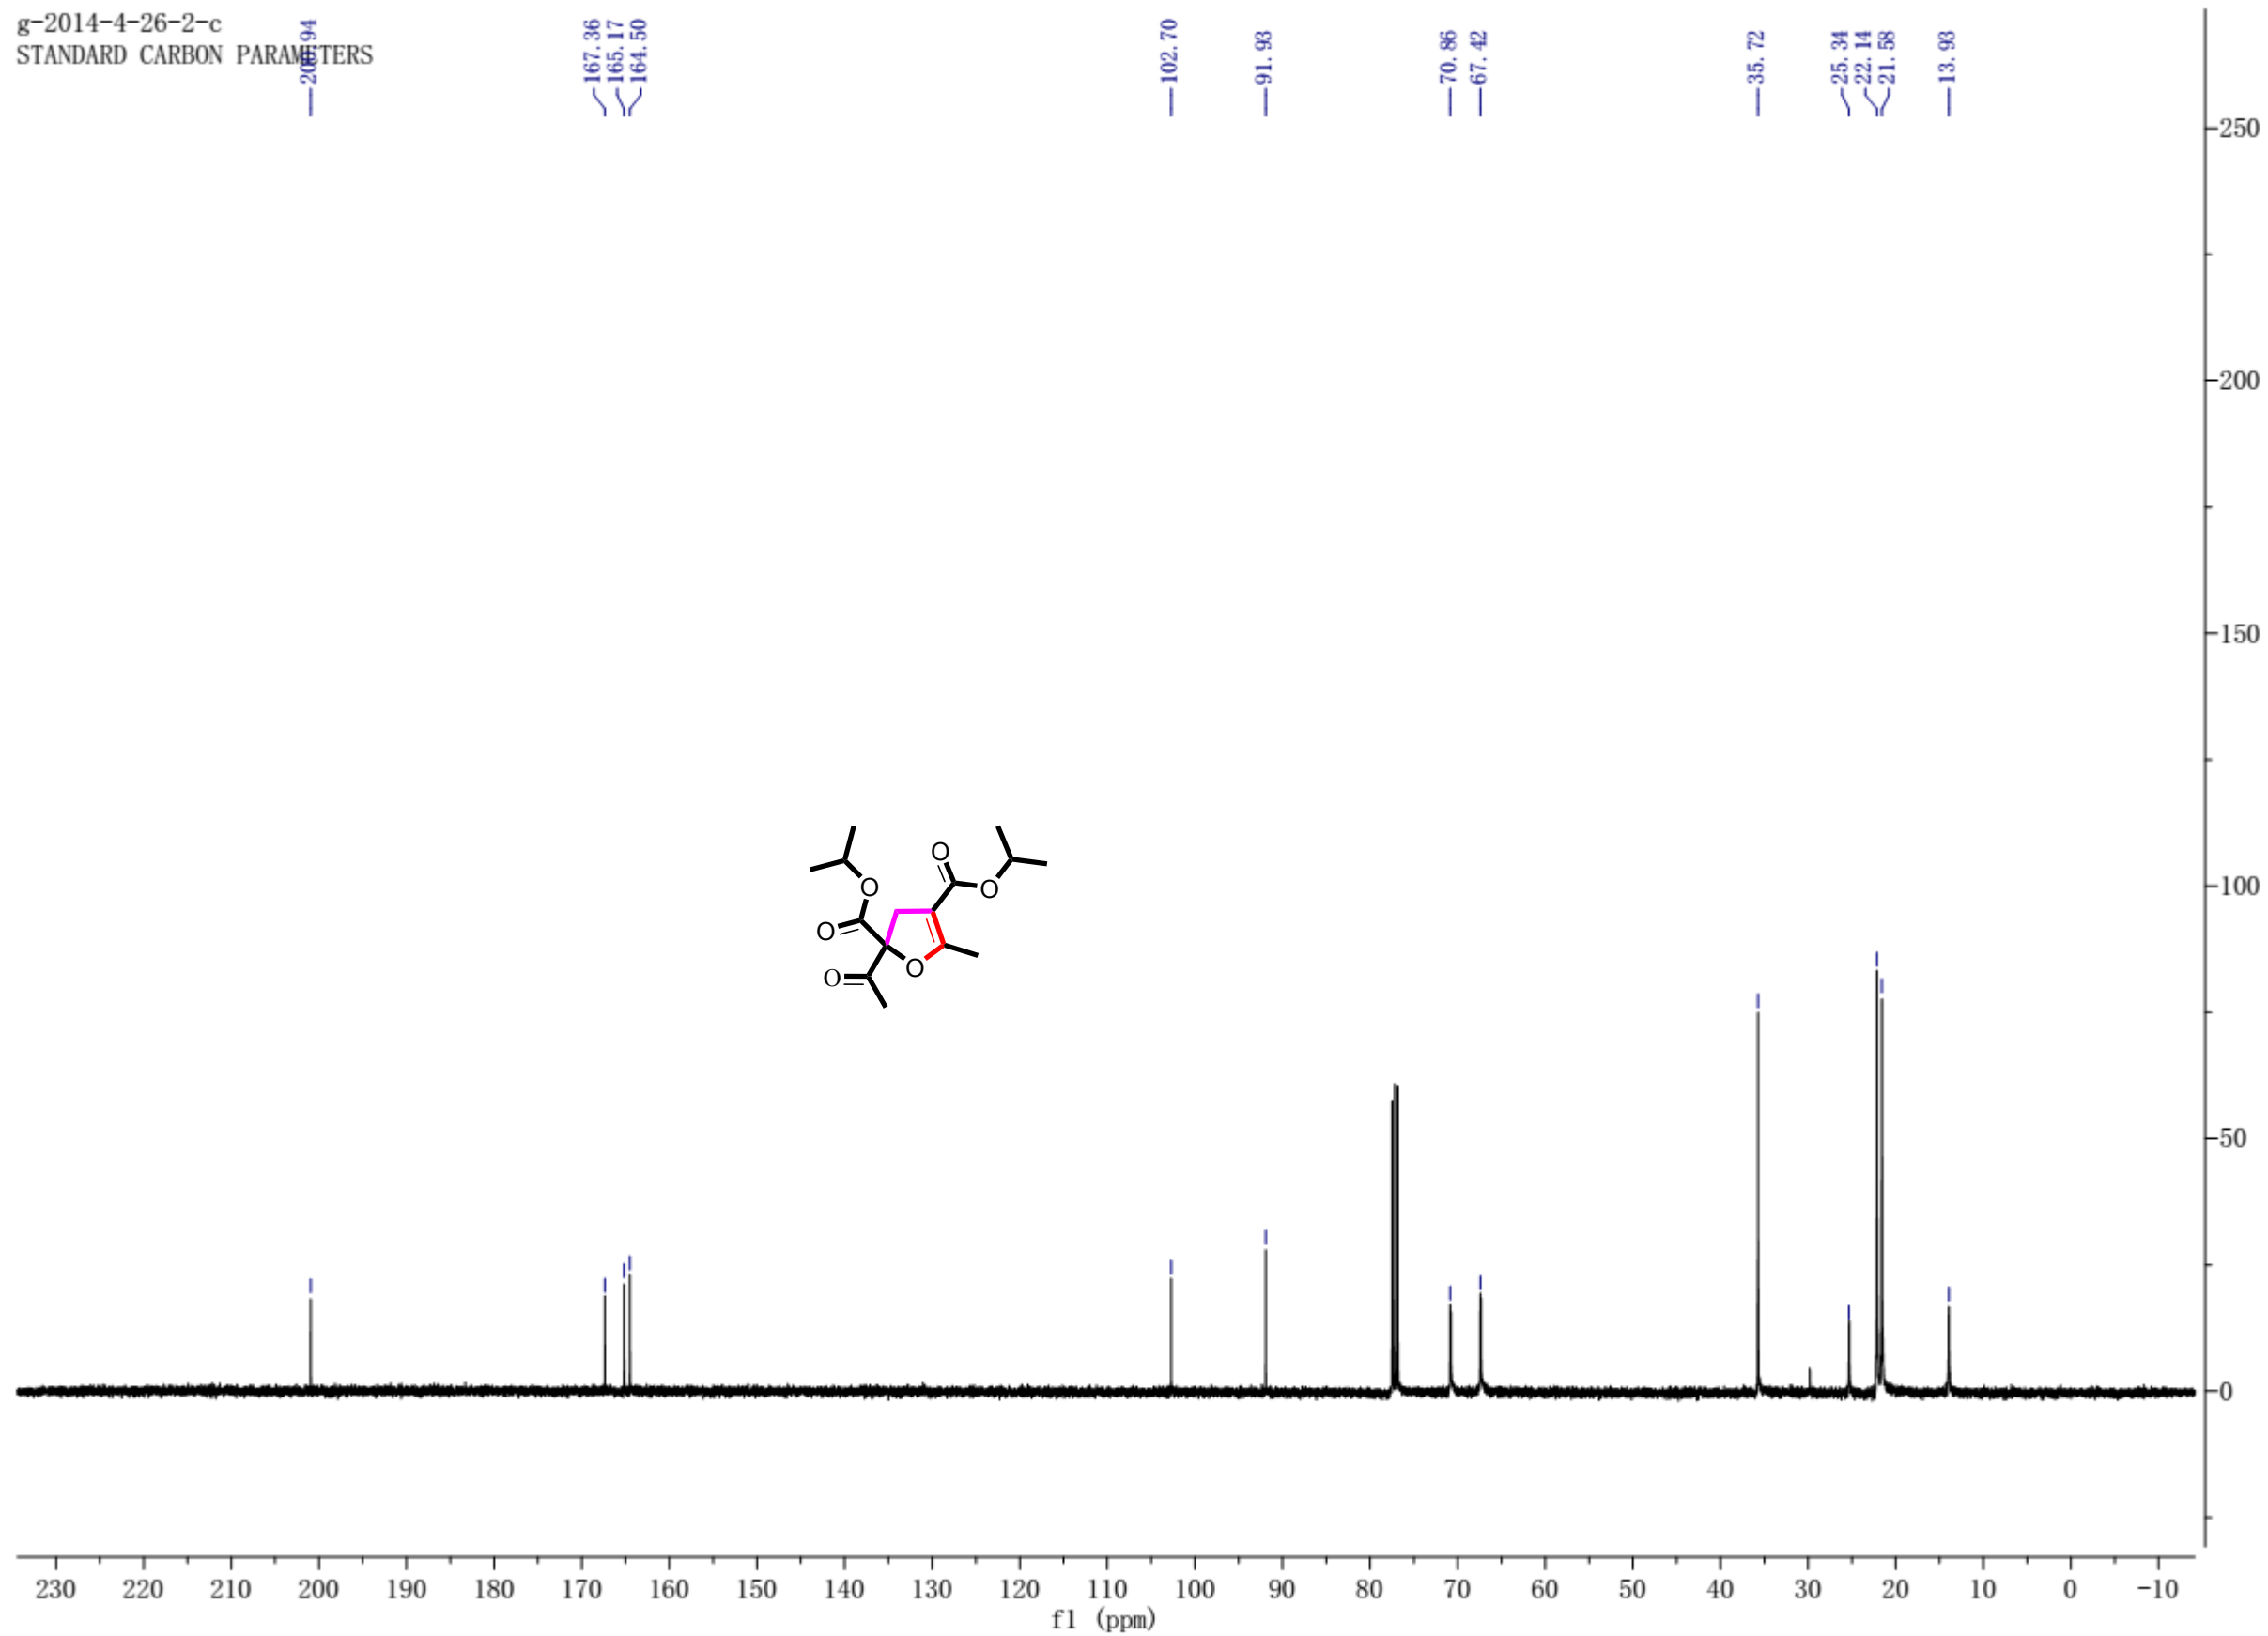



g-2014-4-18-15  
STANDARD CARBON PARAMETERS

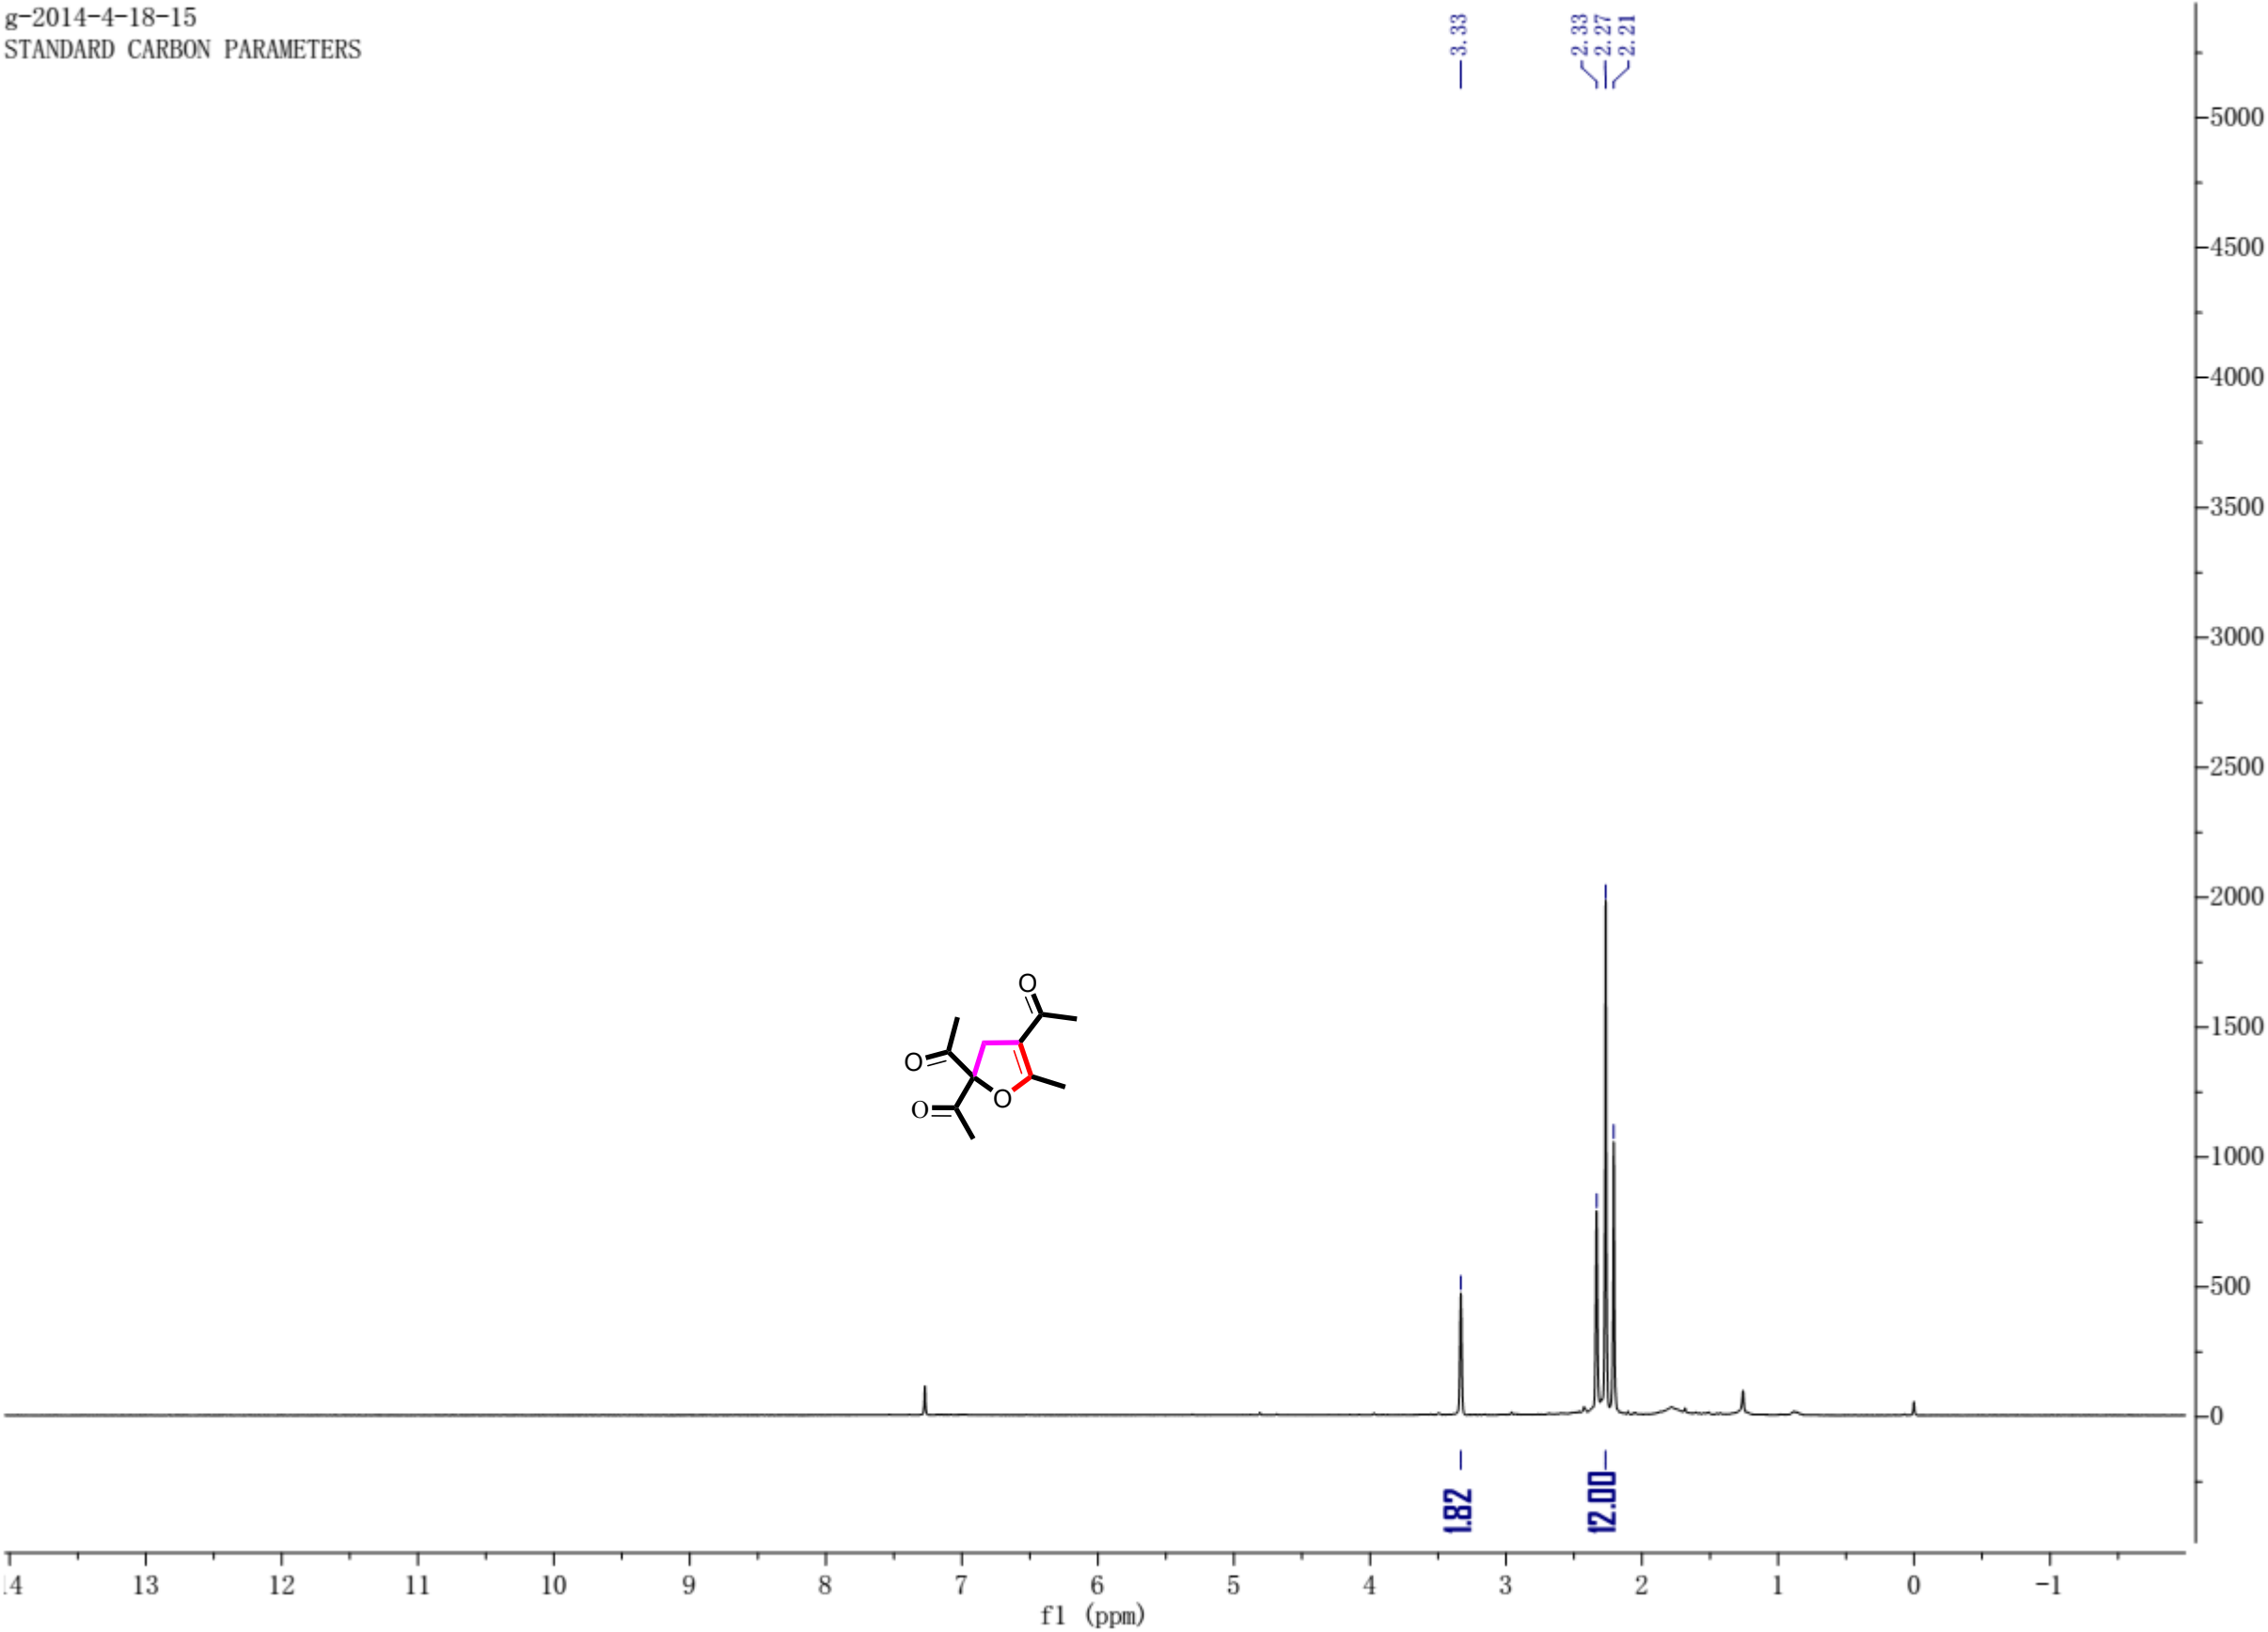

g-2014-4-18-15-c  
STANDARD CARBON PARAMETERS

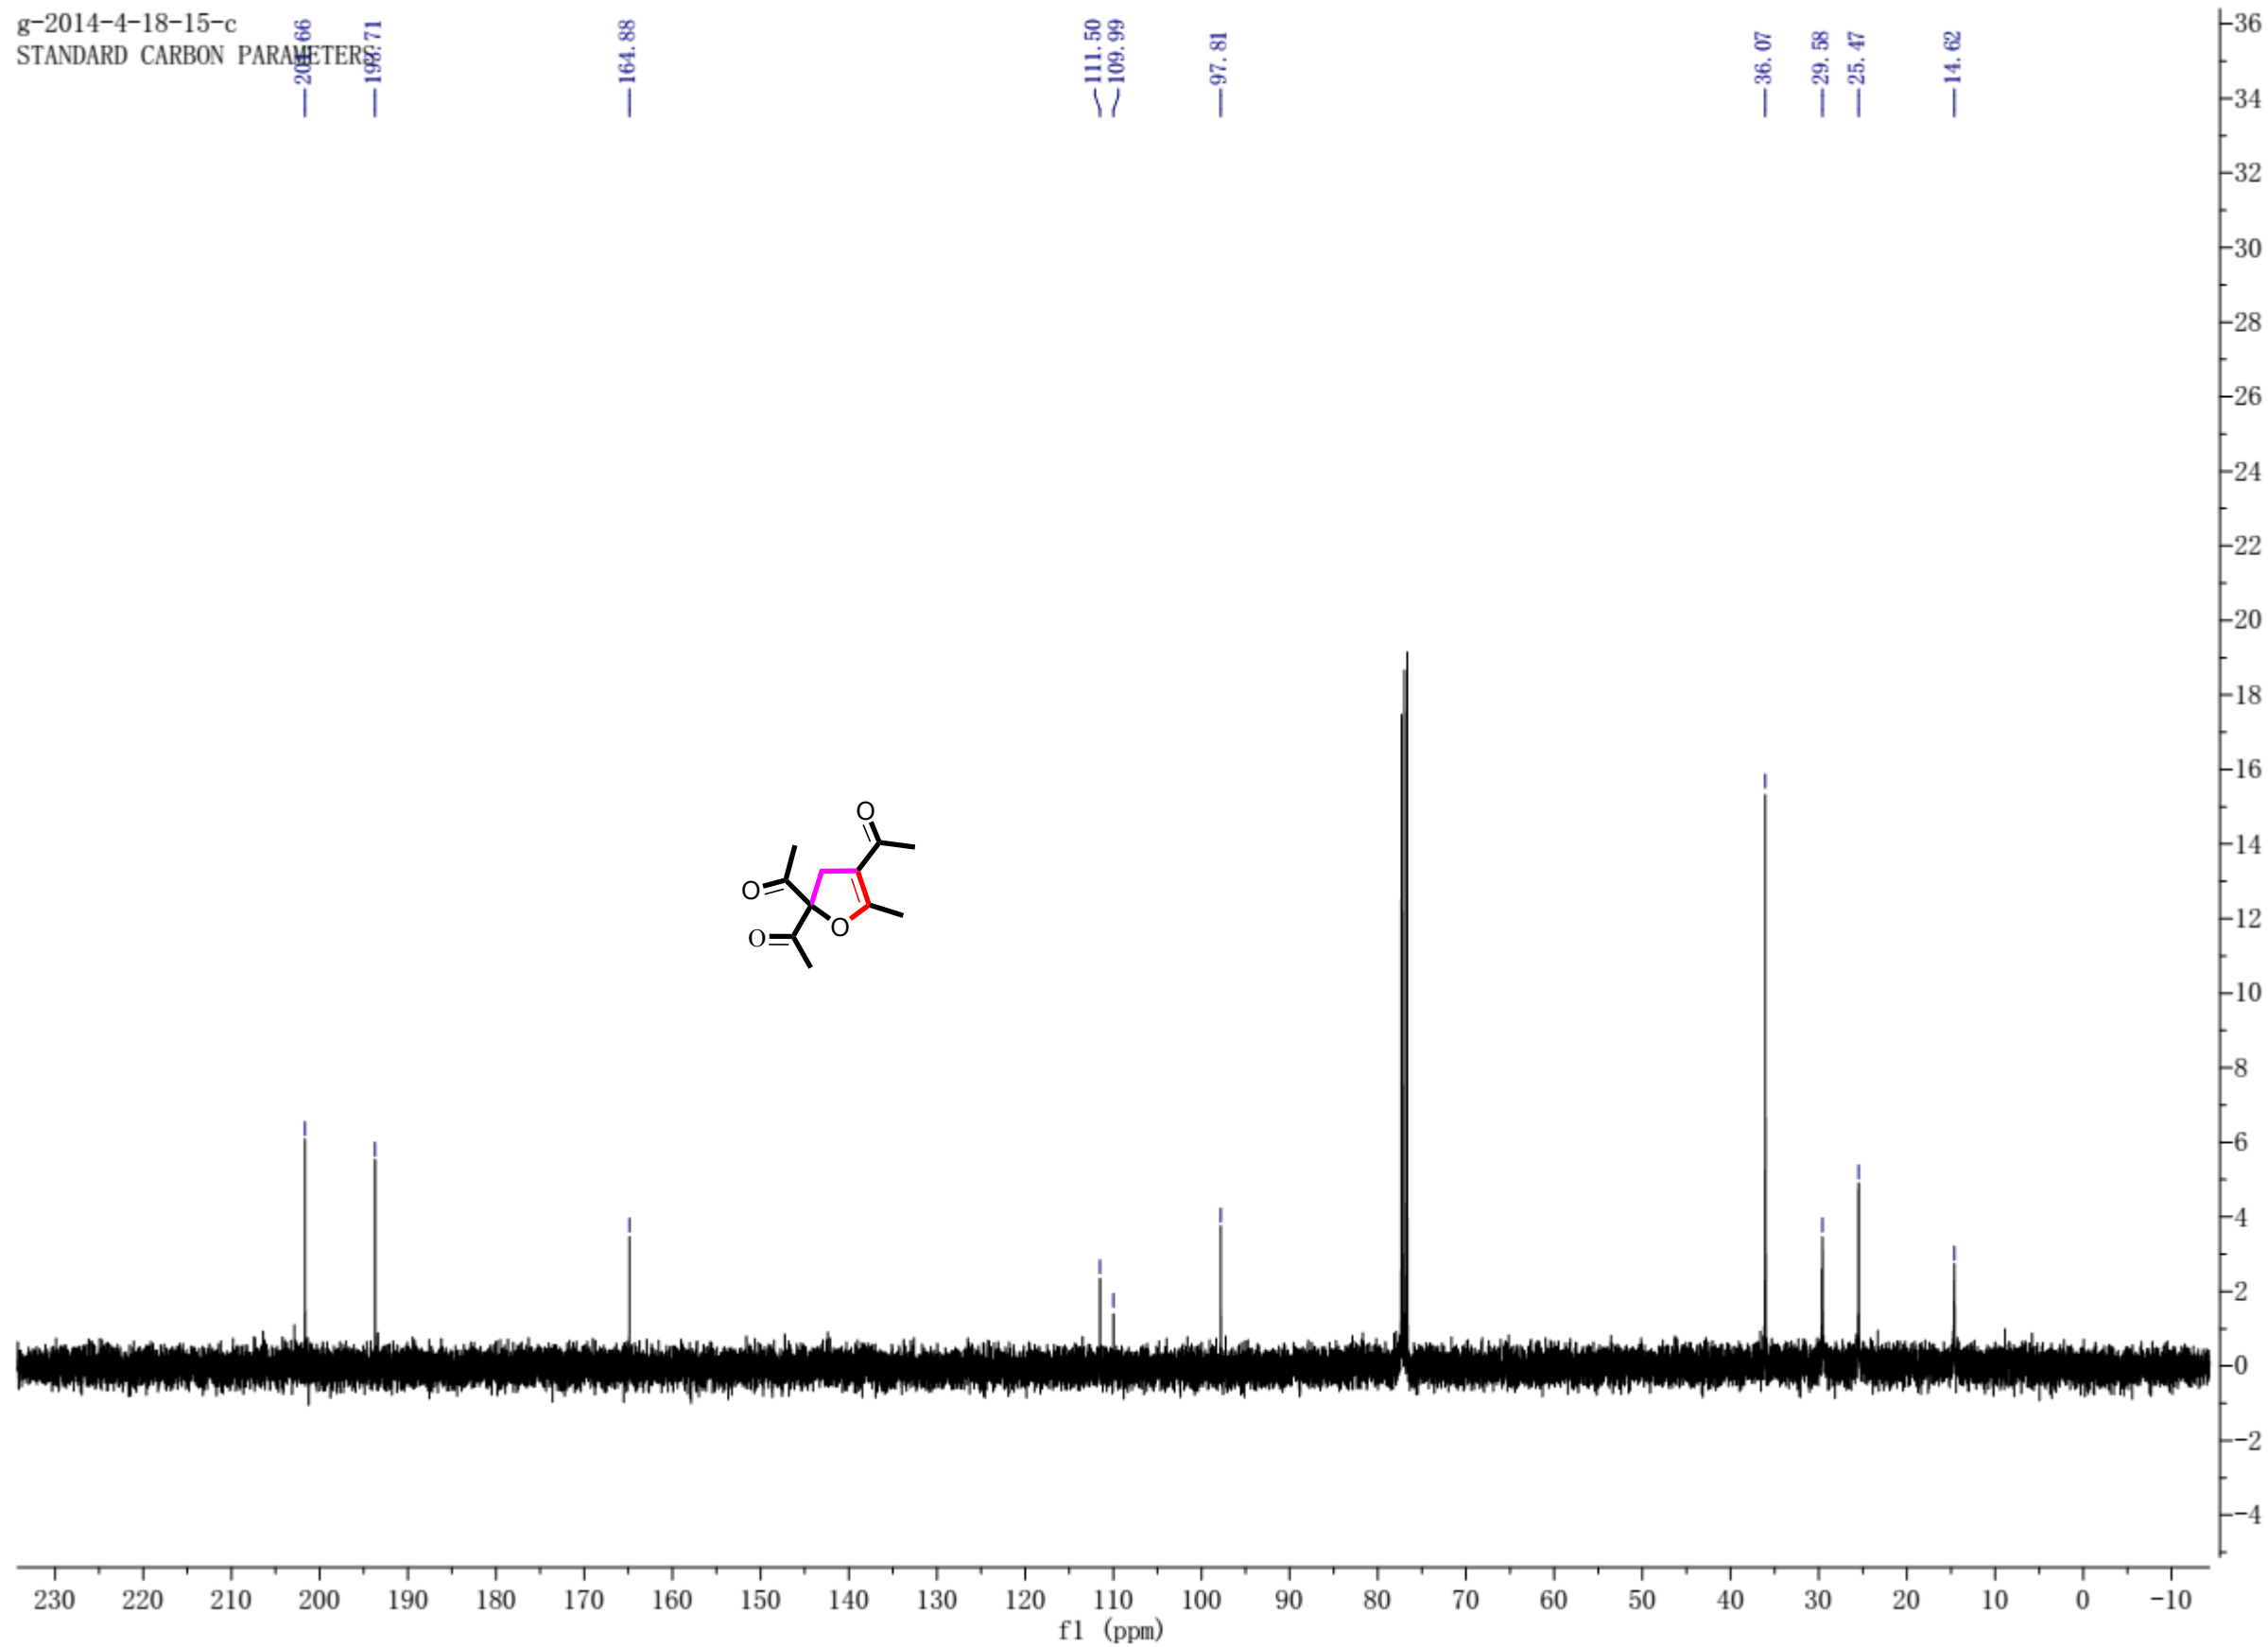

Supplement: c5ob00191a1.pdf [file c5ob00191a1.pdf]
